# Supplementary material
Source: publisher site journal article supplement (https://www.dovepress.com/article/559014)
Supplement: Supplementary file 1 [file 559014%20Supplementary%20Material.pdf]

Supplementary Table 1 PTs signaling of Hydromorphone and morphine stulfa

| PTs                                      | hydromorphone |                      |                       |           |            | morphine sulfate |              |                       |                       |          |            |               |
|------------------------------------------|---------------|----------------------|-----------------------|-----------|------------|------------------|--------------|-----------------------|-----------------------|----------|------------|---------------|
|                                          | Case Reports  | ROR(95% CI)          | PRR(95% CI)           | chisq     | IC(IC025)  | EBGM(EB GM05)    | Case Reports | ROR(95% CI)           | PRR(95% CI)           | chisq    | IC(IC025)  | EBGM(EB GM05) |
| drug dependence                          | 6925          | 47.56(46.35, 48.79)  | 42.05(41.23, 42.88)   | 266035.16 | 5.33(5.29) | 40.24(39.38)     | 3926         | 15.53(15.04, 16.04)   | 14.91(14.34, 15.51)   | 49817.31 | 3.86(3.82) | 14.56(14.17)  |
| emotional distress                       | 3423          | 29.59(28.57, 30.64)  | 27.92(26.85, 29.04)   | 86380.16  | 4.76(4.71) | 27.12(26.33)     | 1655         | 8.61(8.2, 9.05)       | 8.48(8.15, 8.82)      | 10780.04 | 3.07(2.99) | 8.37(8.03)    |
| drug abuse                               | 667           | 8.15(7.55, 8.8)      | 8.07(7.46, 8.73)      | 4098.96   | 3(2.89)    | 8(7.51)          | 1861         | 14.87(14.2, 15.58)    | 14.59(14.03, 15.17)   | 23013.05 | 3.83(3.77) | 14.26(13.71)  |
| learning disability                      | 355           | 66.31(59.52, 73.88)  | 65.92(59.77, 72.71)   | 21166.39  | 5.94(5.79) | 61.54(56.22)     | 127          | 14.39(12.07, 17.17)   | 14.38(12.05, 17.15)   | 1542.51  | 3.81(3.56) | 14.05(12.13)  |
| substance abuse                          | 264           | 32.88(29.08, 37.19)  | 32.74(29.11, 36.83)   | 7842.72   | 4.98(4.81) | 31.64(28.54)     | 504          | 41.44(37.85, 45.37)   | 41.22(37.37, 45.46)   | 18471.81 | 5.27(5.14) | 38.56(35.74)  |
| mental disorder                          | 246           | 5.7(5.03, 6.47)      | 5.68(5.05, 6.39)      | 944.04    | 2.5(2.32)  | 5.65(5.09)       |              |                       |                       |          |            |               |
| delirium                                 | 172           | 5.13(4.41, 5.96)     | 5.12(4.38, 5.99)      | 566.67    | 2.35(2.13) | 5.09(4.49)       | 256          | 4.88(4.32, 5.52)      | 4.87(4.33, 5.48)      | 781.35   | 2.27(2.1)  | 4.84(4.36)    |
| mental status changes                    | 98            | 3.53(2.9, 4.31)      | 3.53(2.9, 4.29)       | 176.82    | 1.81(1.53) | 3.52(2.98)       | 185          | 4.27(3.69, 4.93)      | 4.26(3.71, 4.89)      | 458.73   | 2.08(1.88) | 4.24(3.75)    |
| euphoric mood                            | 83            | 7.94(6.4, 9.86)      | 7.93(6.39, 9.84)      | 498.32    | 2.98(2.67) | 7.87(6.57)       | 119          | 7.29(6.08, 8.73)      | 7.28(6.1, 8.68)       | 636.75   | 2.85(2.59) | 7.2(6.19)     |
| substance dependence                     | 68            | 117.21(91.04, 150.9) | 117.08(90.75, 151.06) | 6934.39   | 6.7(6.34)  | 103.85(84.07)    | 107          | 127.02(103.04, 150.9) | 126.88(102.27, 150.9) | 10967.64 | 6.7(6.41)  | 104.31(87.56) |
| self esteem decreased                    | 68            | 27.21(21.37, 34.63)  | 27.18(21.48, 34.39)   | 1664.83   | 4.72(4.38) | 26.42(21.59)     | 36           | 9.05(6.51, 12.58)     | 9.05(6.49, 12.63)     | 253.87   | 3.16(2.69) | 8.93(6.78)    |
| post-traumatic stress disorder           | 53            | 8.08(6.17, 10.6)     | 8.08(6.14, 10.63)     | 325.82    | 3(2.62)    | 8.02(6.39)       | 39           | 3.78(2.76, 5.18)      | 3.78(2.76, 5.17)      | 79.34    | 1.91(1.46) | 3.76(2.89)    |
| substance use disorder                   | 40            | 22.38(16.35, 30.63)  | 22.36(16.34, 30.6)    | 796.81    | 4.45(4)    | 21.85(16.81)     | 23           | 8.12(5.38, 12.26)     | 8.12(5.38, 12.25)     | 141.59   | 3(2.42)    | 8.02(5.68)    |
| drug use disorder                        | 30            | 4.82(3.37, 6.9)      | 4.82(3.39, 6.86)      | 90.37     | 2.26(1.75) | 4.8(3.56)        | 44           | 4.52(3.36, 6.09)      | 4.52(3.37, 6.06)      | 119.76   | 2.17(1.74) | 4.49(3.51)    |
| suicidal behaviour                       | 25            | 5.86(3.96, 8.69)     | 5.86(3.96, 8.67)      | 100.19    | 2.54(1.99) | 5.83(4.2)        |              |                       |                       |          |            |               |
| attention deficit hyperactivity disorder | 20            | 5.54(3.57, 8.6)      | 5.54(3.6, 8.53)       | 73.9      | 2.46(1.84) | 5.51(3.81)       |              |                       |                       |          |            |               |
| alcohol abuse                            | 18            | 6.48(4.07, 10.3)     | 6.47(4.04, 10.36)     | 82.74     | 2.69(2.03) | 6.44(4.37)       | 15           | 3.44(2.07, 5.71)      | 3.44(2.07, 5.73)      | 25.78    | 1.78(1.07) | 3.42(2.24)    |
| behaviour disorder                       | 18            | 3.91(2.46, 6.2)      | 3.9(2.44, 6.24)       | 38.72     | 1.96(1.31) | 3.89(2.64)       |              |                       |                       |          |            |               |
| near death experience                    | 14            | 4.81(2.85, 8.14)     | 4.81(2.83, 8.17)      | 42.08     | 2.26(1.53) | 4.79(3.09)       |              |                       |                       |          |            |               |

|                                       |     |                      |                      |         |            |              |     |                     |                     |         |            |              |
|---------------------------------------|-----|----------------------|----------------------|---------|------------|--------------|-----|---------------------|---------------------|---------|------------|--------------|
| emotional poverty                     | 7   | 4.18(1.99, 8.79)     | 4.18(1.98, 8.8)      | 16.86   | 2.06(1.06) | 4.17(2.24)   | 11  | 4.2(2.32, 7.6)      | 4.2(2.33, 7.56)     | 26.65   | 2.06(1.24) | 4.18(2.54)   |
| self esteem inflated                  | 7   | 54.04(25.21, 115.83) | 54.03(25.16, 116.04) | 343.93  | 5.67(4.64) | 51.06(26.98) |     |                     |                     |         |            |              |
| antisocial behaviour                  | 6   | 5.84(2.62, 13.03)    | 5.84(2.61, 13.04)    | 23.9    | 2.54(1.47) | 5.81(2.97)   | 11  | 6.87(3.79, 12.44)   | 6.86(3.81, 12.35)   | 54.47   | 2.76(1.94) | 6.8(4.13)    |
| sexually inappropriate behaviour      | 4   | 9.04(3.38, 24.21)    | 9.04(3.39, 24.09)    | 28.32   | 3.16(1.89) | 8.96(3.93)   | 6   | 8.69(3.88, 19.47)   | 8.69(3.89, 19.41)   | 40.25   | 3.1(2.02)  | 8.58(4.37)   |
| grief reaction                        | 3   | 5.83(1.87, 18.13)    | 5.83(1.87, 18.17)    | 11.92   | 2.53(1.11) | 5.8(2.24)    |     |                     |                     |         |            |              |
| breathing-related sleep disorder      | 3   | 11.48(3.68, 35.85)   | 11.48(3.68, 35.78)   | 28.35   | 3.5(2.08)  | 11.35(4.38)  |     |                     |                     |         |            |              |
| imperception                          | 3   | 65.06(20.16, 209.9)  | 65.06(20.07, 210.88) | 176.6   | 5.93(4.45) | 60.78(22.81) |     |                     |                     |         |            |              |
| respiratory rate decreased            | 104 | 33.62(27.64, 40.9)   | 33.57(27.59, 40.84)  | 3169.25 | 5.02(4.74) | 32.41(27.51) | 125 | 25.96(21.7, 31.06)  | 25.93(21.74, 30.93) | 2868.11 | 4.64(4.38) | 24.86(21.4)  |
| general physical condition abnormal   | 42  | 6.25(4.61, 8.46)     | 6.24(4.65, 8.37)     | 183.71  | 2.63(2.2)  | 6.21(4.82)   |     |                     |                     |         |            |              |
| respiratory rate increased            | 34  | 3.84(2.74, 5.38)     | 3.84(2.75, 5.36)     | 71.19   | 1.94(1.46) | 3.83(2.89)   | 54  | 3.9(2.99, 5.1)      | 3.9(2.96, 5.13)     | 115.8   | 1.96(1.57) | 3.88(3.1)    |
| pulse absent                          | 25  | 5.12(3.45, 7.58)     | 5.12(3.46, 7.58)     | 82.35   | 2.35(1.79) | 5.09(3.67)   | 26  | 3.4(2.31, 4.99)     | 3.4(2.3, 5.03)      | 43.69   | 1.76(1.21) | 3.38(2.45)   |
| opiates positive                      | 22  | 44.54(29.03, 68.34)  | 44.53(28.93, 68.54)  | 892.46  | 5.41(4.81) | 42.5(29.7)   | 20  | 25.71(16.43, 40.24) | 25.71(16.38, 40.35) | 454.83  | 4.62(3.99) | 24.66(16.95) |
| drug screen negative                  | 21  | 11.72(7.62, 18.03)   | 11.72(7.61, 18.04)   | 203.29  | 3.53(2.93) | 11.58(8.08)  | 19  | 6.76(4.3, 10.62)    | 6.76(4.31, 10.61)   | 92.11   | 2.74(2.11) | 6.69(4.58)   |
| toxicologic test abnormal             | 20  | 30.42(19.48, 47.5)   | 30.41(19.37, 47.73)  | 550.48  | 4.88(4.25) | 29.46(20.29) | 34  | 33.78(23.9, 47.74)  | 33.77(23.73, 48.06) | 1021.76 | 5(4.51)    | 31.97(23.94) |
| postmortem blood drug level increased | 14  | 42.09(24.63, 71.93)  | 42.08(24.79, 71.43)  | 536.69  | 5.33(4.58) | 40.27(25.72) | 12  | 22.86(12.84, 40.71) | 22.86(12.95, 40.36) | 241.35  | 4.46(3.66) | 22.03(13.6)  |
| coma scale abnormal                   | 13  | 4.51(2.61, 7.78)     | 4.51(2.61, 7.81)     | 35.32   | 2.17(1.41) | 4.49(2.85)   | 16  | 3.54(2.17, 5.79)    | 3.54(2.17, 5.78)    | 29.04   | 1.82(1.13) | 3.53(2.34)   |
| oxygen saturation abnormal            | 12  | 4.73(2.68, 8.35)     | 4.73(2.68, 8.35)     | 35.13   | 2.24(1.45) | 4.71(2.93)   |     |                     |                     |         |            |              |
| blood ph decreased                    | 9   | 4.92(2.56, 9.48)     | 4.92(2.58, 9.39)     | 27.99   | 2.29(1.4)  | 4.9(2.83)    | 35  | 12.41(8.88, 17.35)  | 12.41(8.89, 17.32)  | 359.41  | 3.61(3.13) | 12.17(9.2)   |
| vital functions abnormal              | 8   | 9.7(4.83, 19.48)     | 9.7(4.79, 19.64)     | 61.78   | 3.26(2.32) | 9.61(5.36)   |     |                     |                     |         |            |              |
| postmortem blood drug level abnormal  | 8   | 60.73(29.69, 124.23) | 60.72(29.4, 125.4)   | 440.51  | 5.83(4.86) | 56.99(31.31) | 4   | 18.74(6.92, 50.73)  | 18.74(6.9, 50.92)   | 65.08   | 4.18(2.9)  | 18.19(7.91)  |
| pco2 increased                        | 7   | 9.57(4.55, 20.16)    | 9.57(4.54, 20.15)    | 53.18   | 3.25(2.24) | 9.48(5.09)   | 19  | 16.88(10.7, 26.64)  | 16.88(10.75, 26.49) | 275.83  | 4.04(3.4)  | 16.43(11.22) |

|                                             |     |                         |                         |         |            |                |     |                   |                  |        |            |            |
|---------------------------------------------|-----|-------------------------|-------------------------|---------|------------|----------------|-----|-------------------|------------------|--------|------------|------------|
| po2 decreased                               | 7   | 5.67(2.7, 11.92)        | 5.67(2.69, 11.94)       | 26.74   | 2.5(1.49)  | 5.64(3.03)     | 16  | 8.33(5.09, 13.65) | 8.33(5.1, 13.6)  | 101.74 | 3.04(2.35) | 8.23(5.44) |
| postmortem blood drug level                 | 6   | 105.1(45.1, 244.7)      | 105.09(45.24, 244.11)   | 554.6   | 6.56(5.43) | 94.32(46.51)   |     |                   |                  |        |            |            |
| forced vital capacity decreased             | 6   | 9.86(4.41, 22.05)       | 9.86(4.41, 22.02)       | 47.28   | 3.29(2.21) | 9.77(4.98)     |     |                   |                  |        |            |            |
| antidepressant drug level above therapeutic | 4   | 16.19(6.02, 43.52)      | 16.19(6.08, 43.14)      | 56.02   | 3.99(2.72) | 15.93(6.96)    |     |                   |                  |        |            |            |
| glomerular filtration rate increased        | 4   | 5.24(1.96, 14.01)       | 5.24(1.97, 13.96)       | 13.65   | 2.38(1.11) | 5.22(2.29)     |     |                   |                  |        |            |            |
| corneal reflex decreased                    | 3   | 8.01(2.57, 24.97)       | 8.01(2.57, 24.97)       | 18.25   | 2.99(1.57) | 7.95(3.07)     |     |                   |                  |        |            |            |
| oxygen saturation                           | 3   | 11.15(3.57, 34.82)      | 11.15(3.58, 34.75)      | 27.39   | 3.46(2.04) | 11.03(4.25)    |     |                   |                  |        |            |            |
| chest expansion decreased                   | 3   | 30.7(9.72, 97.02)       | 30.7(9.66, 97.58)       | 83.39   | 4.89(3.45) | 29.73(11.35)   |     |                   |                  |        |            |            |
| analgesic drug level                        | 3   | 151.8(44.7, 515.37)     | 151.8(45.0, 511.71)     | 385.21  | 7.03(5.49) | 130.25(46.84)  |     |                   |                  |        |            |            |
| antasthmatic drug level                     | 3   | 683.12(152.88, 3052.33) | 683.08(154.01, 3029.68) | 1167.57 | 8.61(6.88) | 390.76(111.67) |     |                   |                  |        |            |            |
| breath sounds absent                        | 3   | 27.88(8.84, 87.95)      | 27.88(8.77, 88.62)      | 75.44   | 4.76(3.32) | 27.08(10.36)   |     |                   |                  |        |            |            |
| inspiratory capacity decreased              | 3   | 12.89(4.12, 40.29)      | 12.89(4.14, 40.18)      | 32.44   | 3.67(2.24) | 12.72(4.9)     |     |                   |                  |        |            |            |
| unresponsive to stimuli                     | 246 | 9.82(8.66, 11.14)       | 9.79(8.7, 11.01)        | 1921.01 | 3.28(3.1)  | 9.69(8.72)     | 300 | 7.65(6.83, 8.58)  | 7.63(6.78, 8.58) | 1707.3 | 2.92(2.75) | 7.55(6.86) |
| sedation                                    | 146 | 6.05(5.14, 7.12)        | 6.04(5.16, 7.07)        | 609.62  | 2.59(2.35) | 6(5.24)        | 241 | 6.4(5.63, 7.26)   | 6.38(5.67, 7.18) | 1082.7 | 2.66(2.48) | 6.32(5.69) |
| depressed level of consciousness            | 137 | 3.46(2.93, 4.1)         | 3.46(2.9, 4.13)         | 238.46  | 1.79(1.54) | 3.45(3)        | 370 | 6.01(5.43, 6.66)  | 5.99(5.43, 6.61) | 1524.9 | 2.57(2.42) | 5.94(5.45) |
| hyperaesthesia                              | 89  | 10.54(8.55, 13)         | 10.53(8.49, 13.06)      | 758.83  | 3.38(3.08) | 10.42(8.75)    | 95  | 7.18(5.87, 8.79)  | 7.17(5.89, 8.72) | 498.77 | 2.83(2.54) | 7.1(5.99)  |
| myoclonus                                   | 58  | 4.9(3.79, 6.35)         | 4.9(3.8, 6.32)          | 179.12  | 2.29(1.92) | 4.88(3.93)     | 150 | 8.17(6.95, 9.6)   | 8.15(6.97, 9.53) | 928.69 | 3.01(2.78) | 8.06(7.04) |
| brain injury                                | 30  | 3.01(2.11, 4.31)        | 3.01(2.12, 4.28)        | 40.21   | 1.59(1.08) | 3.01(2.23)     | 58  | 3.73(2.88, 4.83)  | 3.73(2.89, 4.81) | 115.01 | 1.89(1.52) | 3.71(2.99) |
| stupor                                      | 24  | 7.26(4.86, 10.86)       | 7.26(4.91, 10.74)       | 128.57  | 2.85(2.28) | 7.21(5.15)     | 36  | 6.98(5.02, 9.7)   | 6.98(5, 9.74)    | 182.15 | 2.79(2.32) | 6.91(5.25) |
| incoherent                                  | 23  | 3.47(2.3, 5.22)         | 3.47(2.3, 5.24)         | 40.24   | 1.79(1.21) | 3.46(2.45)     | 44  | 4.25(3.16, 5.72)  | 4.25(3.17, 5.7)  | 108.43 | 2.08(1.66) | 4.22(3.29) |

|                                           |      |                       |                      |          |            |              |      |                    |                    |          |            |              |
|-------------------------------------------|------|-----------------------|----------------------|----------|------------|--------------|------|--------------------|--------------------|----------|------------|--------------|
| psychomotor skills impaired               | 23   | 8.64(5.73, 13.02)     | 8.63(5.72, 13.02)    | 153.81   | 3.1(2.52)  | 8.56(6.07)   | 53   | 12.86(9.79, 16.88) | 12.85(9.77, 16.91) | 566.78   | 3.65(3.27) | 12.6(10.03)  |
| judgement impaired                        | 19   | 12.5(7.95, 19.66)     | 12.49(7.96, 19.6)    | 198.2    | 3.63(2.99) | 12.34(8.45)  | 30   | 12.69(8.84, 18.22) | 12.69(8.92, 18.06) | 316.05   | 3.64(3.12) | 12.44(9.19)  |
| radiculopathy                             | 10   | 3.75(2.02, 6.98)      | 3.75(2, 7.02)        | 20.11    | 1.9(1.05)  | 3.74(2.22)   |      |                    |                    |          |            |              |
| complex regional pain syndrome            | 8    | 5.15(2.57, 10.33)     | 5.15(2.59, 10.23)    | 26.63    | 2.36(1.41) | 5.13(2.87)   | 9    | 3.7(1.92, 7.13)    | 3.7(1.94, 7.06)    | 17.63    | 1.88(0.98) | 3.68(2.13)   |
| allodynia                                 | 7    | 7.86(3.74, 16.55)     | 7.86(3.73, 16.55)    | 41.56    | 2.96(1.96) | 7.8(4.19)    | 24   | 17.57(11.7, 26.37) | 17.56(11.6, 26.5)  | 363.87   | 4.09(3.52) | 17.08(12.16) |
| drug withdrawal convulsions               | 7    | 3.85(1.83, 8.08)      | 3.85(1.83, 8.11)     | 14.69    | 1.94(0.94) | 3.84(2.06)   |      |                    |                    |          |            |              |
| hyporesponsive to stimuli                 | 7    | 6.68(3.17, 14.04)     | 6.68(3.17, 14.07)    | 33.53    | 2.73(1.73) | 6.63(3.56)   |      |                    |                    |          |            |              |
| toxic leukoencephalopathy                 | 7    | 10.38(4.93, 21.88)    | 10.38(4.93, 21.86)   | 58.69    | 3.36(2.36) | 10.28(5.51)  | 26   | 25.4(17.15, 37.61) | 25.39(17.1, 37.58) | 583.64   | 4.61(4.05) | 24.37(17.54) |
| sleep deficit                             | 7    | 4.11(1.96, 8.63)      | 4.11(1.95, 8.66)     | 16.39    | 2.03(1.03) | 4.09(2.2)    |      |                    |                    |          |            |              |
| hypertensive encephalopathy               | 5    | 8.28(3.43, 19.97)     | 8.28(3.43, 20)       | 31.71    | 3.04(1.88) | 8.21(3.93)   |      |                    |                    |          |            |              |
| arachnoiditis                             | 4    | 5.65(2.11, 15.1)      | 5.65(2.12, 15.05)    | 15.21    | 2.49(1.22) | 5.62(2.47)   | 8    | 7.25(3.61, 14.56)  | 7.25(3.58, 14.68)  | 42.58    | 2.84(1.89) | 7.17(4)      |
| medication overuse headache               | 4    | 4.8(1.8, 12.82)       | 4.8(1.8, 12.79)      | 11.97    | 2.26(0.99) | 4.78(2.1)    |      |                    |                    |          |            |              |
| pseudostroke                              | 4    | 18.04(6.7, 48.52)     | 18.04(6.77, 48.07)   | 63.11    | 4.15(2.87) | 17.7(7.73)   |      |                    |                    |          |            |              |
| chanter syndrome                          | 4    | 75.9(27.37, 210.5)    | 75.9(27.39, 210.32)  | 272.9    | 6.13(4.81) | 70.14(29.87) |      |                    |                    |          |            |              |
| retrograde amnesia                        | 3    | 6.07(1.95, 18.9)      | 6.07(1.95, 18.92)    | 12.63    | 2.59(1.17) | 6.04(2.34)   | 5    | 6.48(2.69, 15.66)  | 6.48(2.68, 15.65)  | 22.94    | 2.68(1.52) | 6.42(3.07)   |
| reversible ischaemic neurological deficit | 3    | 24.84(7.89, 78.21)    | 24.84(7.82, 78.95)   | 66.82    | 4.6(3.16)  | 24.21(9.27)  |      |                    |                    |          |            |              |
| central pain syndrome                     | 3    | 12.89(4.12, 40.29)    | 12.89(4.14, 40.18)   | 32.44    | 3.67(2.24) | 12.72(4.9)   |      |                    |                    |          |            |              |
| overdose                                  | 3212 | 15.51(14.9, 6, 16.07) | 14.71(14.1, 4, 15.3) | 40547.74 | 3.86(3.81) | 14.49(14.07) | 2402 | 7.15(6.87, 7.45)   | 6.99(6.72, 7.27)   | 12228.61 | 2.79(2.73) | 6.92(6.69)   |
| foetal exposure during pregnancy          | 566  | 7.16(6.59, 7.78)      | 7.1(6.56, 7.68)      | 2946.42  | 2.82(2.7)  | 7.05(6.58)   |      |                    |                    |          |            |              |
| maternal exposure during pregnancy        | 265  | 3.24(2.87, 3.65)      | 3.23(2.87, 3.63)     | 406.21   | 1.69(1.51) | 3.22(2.91)   |      |                    |                    |          |            |              |
| accidental overdose                       | 134  | 3.89(3.28, 4.61)      | 3.88(3.25, 4.63)     | 285.85   | 1.95(1.71) | 3.87(3.36)   | 497  | 9.34(8.55, 10.21)  | 9.3(8.43, 10.26)   | 3623.83  | 3.2(3.07)  | 9.17(8.51)   |

|                                                     |    |                       |                       |        |            |               |    |                     |                     |         |            |              |
|-----------------------------------------------------|----|-----------------------|-----------------------|--------|------------|---------------|----|---------------------|---------------------|---------|------------|--------------|
| incorrect route of product administration           | 47 | 3.11(2.34, 4.15)      | 3.11(2.32, 4.17)      | 67.13  | 1.63(1.23) | 3.1(2.44)     |    |                     |                     |         |            |              |
| alcohol poisoning                                   | 28 | 10.68(7.36, 15.5)     | 10.67(7.35, 15.48)    | 242.68 | 3.4(2.87)  | 10.56(7.73)   | 25 | 6.07(4.1, 9.01)     | 6.07(4.1, 8.98)     | 104.84  | 2.59(2.03) | 6.02(4.33)   |
| exposure to toxic agent                             | 24 | 9.18(6.14, 13.73)     | 9.18(6.08, 13.85)     | 173.21 | 3.19(2.62) | 9.1(6.5)      | 96 | 24.18(19.71, 29.66) | 24.16(19.86, 29.39) | 2046.04 | 4.54(4.25) | 23.23(19.58) |
| postoperative ileus                                 | 15 | 27.11(16.22, 45.31)   | 27.11(16.22, 45.13)   | 366.25 | 4.72(4)    | 26.35(17.15)  |    |                     |                     |         |            |              |
| exposure via father                                 | 13 | 9.12(5.28, 15.74)     | 9.11(5.26, 15.77)     | 92.99  | 3.18(2.42) | 9.03(5.72)    |    |                     |                     |         |            |              |
| labelled drug-drug interaction issue                | 11 | 10.77(5.95, 19.52)    | 10.77(5.98, 19.39)    | 96.38  | 3.41(2.59) | 10.66(6.48)   |    |                     |                     |         |            |              |
| anaesthetic complication neurological               | 10 | 15.01(8.03, 28.04)    | 15(8.01, 28.09)       | 128.59 | 3.89(3.03) | 14.78(8.76)   |    |                     |                     |         |            |              |
| sedation complication                               | 9  | 3.86(2.01, 7.43)      | 3.86(2.02, 7.37)      | 19     | 1.94(1.05) | 3.85(2.23)    | 62 | 17.41(13.53, 22.42) | 17.4(13.49, 22.45)  | 930.68  | 4.08(3.72) | 16.93(13.7)  |
| product name confusion                              | 8  | 6.5(3.24, 13.03)      | 6.5(3.27, 12.91)      | 36.97  | 2.69(1.75) | 6.46(3.61)    |    |                     |                     |         |            |              |
| decompression sickness                              | 6  | 130.12(55.31, 306.11) | 130.11(54.93, 308.21) | 672.62 | 6.83(5.69) | 113.97(55.71) |    |                     |                     |         |            |              |
| documented hypersensitivity to administered product | 4  | 5.09(1.9, 13.6)       | 5.09(1.91, 13.56)     | 13.07  | 2.34(1.07) | 5.07(2.23)    | 11 | 9.02(4.97, 16.35)   | 9.01(5, 16.22)      | 77.18   | 3.15(2.33) | 8.89(5.4)    |
| ocular procedural complication                      | 4  | 23.51(8.71, 63.42)    | 23.5(8.65, 63.85)     | 84.02  | 4.52(3.24) | 22.94(10)     |    |                     |                     |         |            |              |
| post-traumatic pain                                 | 4  | 8.04(3.01, 21.52)     | 8.04(3.02, 21.42)     | 24.45  | 3(1.72)    | 7.98(3.5)     |    |                     |                     |         |            |              |
| post procedural discharge                           | 4  | 5.9(2.21, 15.76)      | 5.89(2.21, 15.69)     | 16.15  | 2.55(1.28) | 5.86(2.58)    |    |                     |                     |         |            |              |
| paternal exposure timing unspecified                | 4  | 14.52(5.41, 38.98)    | 14.51(5.45, 38.66)    | 49.54  | 3.84(2.56) | 14.3(6.26)    |    |                     |                     |         |            |              |
| spinal shock                                        | 3  | 47.11(14.76, 150.36)  | 47.11(14.82, 149.74)  | 128.73 | 5.49(4.03) | 44.84(16.98)  |    |                     |                     |         |            |              |
| stab wound                                          | 3  | 8.57(2.75, 26.7)      | 8.57(2.75, 26.71)     | 19.86  | 3.09(1.66) | 8.49(3.28)    | 3  | 5.46(1.75, 17.03)   | 5.46(1.75, 17.02)   | 10.84   | 2.44(1.02) | 5.42(2.09)   |
| exposure via partner                                | 3  | 5.67(1.82, 17.64)     | 5.67(1.82, 17.67)     | 11.46  | 2.5(1.08)  | 5.64(2.18)    |    |                     |                     |         |            |              |
| vascular access site thrombosis                     | 3  | 75.9(23.37, 246.48)   | 75.9(23.42, 246.02)   | 204.68 | 6.13(4.65) | 70.14(26.18)  |    |                     |                     |         |            |              |
| transfusion-related acute lung injury               | 3  | 10.59(3.39, 33.06)    | 10.59(3.4, 33.01)     | 25.76  | 3.39(1.96) | 10.48(4.04)   |    |                     |                     |         |            |              |
| febrile nonhaemolytic transfusion reaction          | 3  | 18.72(5.97, 58.71)    | 18.71(6, 58.31)       | 49.29  | 4.2(2.77)  | 18.36(7.05)   |    |                     |                     |         |            |              |

|                                      |      |                     |                     |          |            |              |      |                     |                     |          |            |              |  |
|--------------------------------------|------|---------------------|---------------------|----------|------------|--------------|------|---------------------|---------------------|----------|------------|--------------|--|
| pain                                 | 3903 | 6.7(6.49, 6.93)     | 6.32(6.08, 6.57)    | 17560.5  | 2.65(2.61) | 6.29(6.12)   |      |                     |                     |          |            |              |  |
| drug withdrawal syndrome             | 2340 | 26.49(25.41, 27.63) | 25.47(24.49, 26.49) | 53609.21 | 4.63(4.57) | 24.81(23.95) | 1582 | 11.06(10.52, 11.63) | 10.89(10.27, 11.55) | 13966.97 | 3.42(3.35) | 10.71(10.27) |  |
| drug withdrawal syndrome neonatal    | 554  | 36.33(33.36, 39.56) | 35.99(33.28, 38.93) | 18135.34 | 5.12(4.99) | 34.66(32.27) | 213  | 8.64(7.54, 9.89)    | 8.62(7.51, 9.89)    | 1413.8   | 3.09(2.89) | 8.51(7.6)    |  |
| developmental delay                  | 352  | 37.93(34.09, 42.22) | 37.71(34.19, 41.59) | 12081.9  | 5.18(5.03) | 36.25(33.15) | 121  | 8.06(6.74, 9.65)    | 8.05(6.75, 9.6)     | 737.13   | 2.99(2.73) | 7.95(6.85)   |  |
| withdrawal syndrome                  | 172  | 4.06(3.5, 4.72)     | 4.05(3.46, 4.74)    | 394.18   | 2.01(1.8)  | 4.04(3.56)   | 288  | 4.35(3.88, 4.89)    | 4.34(3.86, 4.88)    | 736.11   | 2.11(1.94) | 4.32(3.92)   |  |
| inadequate analgesia                 | 103  | 11.73(9.66, 14.25)  | 11.71(9.63, 14.25)  | 996.43   | 3.53(3.25) | 11.58(9.84)  | 196  | 14.41(12.51, 16.61) | 14.38(12.54, 16.49) | 2382.31  | 3.81(3.61) | 14.06(12.49) |  |
| drug tolerance                       | 60   | 12(9.3, 15.48)      | 11.99(9.29, 15.47)  | 596.4    | 3.57(3.2)  | 11.84(9.57)  | 81   | 10.38(8.33, 12.93)  | 10.37(8.36, 12.87)  | 673.87   | 3.35(3.04) | 10.21(8.49)  |  |
| accidental death                     | 35   | 18.44(13.19, 25.77) | 18.43(13.21, 25.72) | 565.39   | 4.18(3.7)  | 18.08(13.66) | 52   | 17.65(13.39, 23.26) | 17.64(13.41, 23.21) | 792.08   | 4.1(3.71)  | 17.15(13.61) |  |
| granuloma                            | 21   | 6.15(4, 9.45)       | 6.15(4, 9.47)       | 89.96    | 2.61(2.01) | 6.12(4.27)   | 28   | 5.24(3.61, 7.61)    | 5.24(3.61, 7.6)     | 95.29    | 2.38(1.85) | 5.2(3.81)    |  |
| breakthrough pain                    | 16   | 6.61(4.04, 10.81)   | 6.61(4.05, 10.79)   | 75.62    | 2.72(2.03) | 6.57(4.35)   | 34   | 9.04(6.44, 12.68)   | 9.03(6.47, 12.6)    | 239.17   | 3.16(2.67) | 8.91(6.71)   |  |
| temperature regulation disorder      | 16   | 8.06(4.93, 13.19)   | 8.06(4.94, 13.16)   | 98.08    | 3(2.31)    | 8(5.3)       |      |                     |                     |          |            |              |  |
| drug tolerance increased             | 14   | 17.28(10.18, 29.33) | 17.28(10.18, 29.33) | 210.7    | 4.09(3.35) | 16.97(10.9)  | 21   | 16.69(10.82, 25.76) | 16.69(10.84, 25.69) | 301.13   | 4.02(3.41) | 16.25(11.31) |  |
| foreign body reaction                | 7    | 28.72(13.53, 60.95) | 28.72(13.64, 60.48) | 181.55   | 4.8(3.78)  | 27.87(14.85) |      |                     |                     |          |            |              |  |
| fat tissue decreased                 | 5    | 14.14(5.85, 34.21)  | 14.14(5.85, 34.16)  | 60.13    | 3.8(2.64)  | 13.94(6.66)  |      |                     |                     |          |            |              |  |
| therapeutic product effect increased | 5    | 4.64(1.93, 11.18)   | 4.64(1.92, 11.21)   | 14.22    | 2.21(1.05) | 4.62(2.22)   |      |                     |                     |          |            |              |  |
| feeling of relaxation                | 5    | 7.01(2.91, 16.89)   | 7.01(2.9, 16.93)    | 25.55    | 2.8(1.64)  | 6.96(3.33)   |      |                     |                     |          |            |              |  |
| administration site bruise           | 4    | 13.06(4.87, 35.04)  | 13.06(4.9, 34.8)    | 43.91    | 3.69(2.41) | 12.89(5.64)  |      |                     |                     |          |            |              |  |
| administration site swelling         | 4    | 12.56(4.68, 33.7)   | 12.56(4.71, 33.47)  | 41.99    | 3.63(2.36) | 12.41(5.43)  |      |                     |                     |          |            |              |  |
| administration site erythema         | 3    | 11.29(3.62, 35.26)  | 11.29(3.62, 35.19)  | 27.79    | 3.48(2.06) | 11.16(4.31)  | 4    | 9.64(3.59, 25.91)   | 9.64(3.62, 25.69)   | 30.48    | 3.25(1.97) | 9.5(4.16)    |  |
| respiratory depression               | 191  | 15.73(13.63, 18.15) | 15.68(13.67, 17.99) | 2580.73  | 3.95(3.74) | 15.43(13.69) | 452  | 24.35(22.16, 26.76) | 24.24(21.98, 26.74) | 9669.02  | 4.54(4.41) | 23.31(21.54) |  |
| respiratory arrest                   | 153  | 5.33(4.54, 6.25)    | 5.32(4.55, 6.22)    | 533.28   | 2.4(2.17)  | 5.29(4.63)   | 426  | 9.58(8.7, 10.55)    | 9.54(8.65, 10.52)   | 3206.38  | 3.23(3.09) | 9.4(8.68)    |  |

|                               |    |                    |                    |        |            |              |     |                    |                    |        |            |              |
|-------------------------------|----|--------------------|--------------------|--------|------------|--------------|-----|--------------------|--------------------|--------|------------|--------------|
| apnoea                        | 64 | 8.07(6.31, 10.32)  | 8.06(6.25, 10.4)   | 392.43 | 3(2.65)    | 8(6.51)      | 134 | 10.89(9.18, 12.92) | 10.87(9.11, 12.97) | 1179.3 | 3.42(3.17) | 10.69(9.27)  |
| hypopnoea                     | 24 | 7.23(4.84, 10.81)  | 7.23(4.89, 10.7)   | 127.85 | 2.84(2.28) | 7.18(5.13)   | 31  | 5.97(4.19, 8.51)   | 5.97(4.2, 8.5)     | 127.02 | 2.57(2.06) | 5.92(4.4)    |
| respiratory acidosis          | 22 | 5.72(3.76, 8.7)    | 5.72(3.79, 8.63)   | 85.16  | 2.51(1.92) | 5.69(4.01)   | 54  | 9.04(6.91, 11.83)  | 9.04(6.87, 11.89)  | 380.2  | 3.16(2.77) | 8.92(7.12)   |
| hypercapnia                   | 19 | 6.45(4.11, 10.13)  | 6.45(4.11, 10.12)  | 86.88  | 2.68(2.05) | 6.41(4.39)   | 42  | 9.18(6.77, 12.45)  | 9.17(6.7, 12.55)   | 301.14 | 3.18(2.74) | 9.05(7.01)   |
| snoring                       | 18 | 4.73(2.98, 7.52)   | 4.73(2.96, 7.57)   | 52.72  | 2.24(1.59) | 4.71(3.2)    | 27  | 4.54(3.11, 6.63)   | 4.54(3.13, 6.59)   | 73.97  | 2.17(1.64) | 4.51(3.29)   |
| hypoventilation               | 15 | 4.46(2.69, 7.41)   | 4.46(2.68, 7.42)   | 40.05  | 2.15(1.44) | 4.44(2.91)   | 46  | 8.82(6.59, 11.8)   | 8.81(6.57, 11.82)  | 313.83 | 3.12(2.7)  | 8.7(6.81)    |
| apnoeic attack                | 15 | 26.23(15.7, 43.83) | 26.22(15.7, 43.65) | 353.72 | 4.67(3.96) | 25.52(16.61) | 6   | 6.58(2.94, 14.71)  | 6.58(2.95, 14.7)   | 28.06  | 2.7(1.63)  | 6.52(3.32)   |
| bradypnoea                    | 11 | 4.34(2.4, 7.85)    | 4.34(2.41, 7.81)   | 28.13  | 2.11(1.29) | 4.32(2.63)   | 64  | 16.49(12.8, 21.15) | 16.48(12.7, 21.26) | 905.14 | 4.01(3.65) | 16.06(13.04) |
| diaphragmatic paralysis       | 7  | 11.76(5.58, 24.8)  | 11.76(5.58, 24.77) | 68.06  | 3.54(2.53) | 11.63(6.23)  |     |                    |                    |        |            |              |
| pulmonary granuloma           | 5  | 4.32(1.79, 10.39)  | 4.32(1.79, 10.44)  | 12.68  | 2.1(0.95)  | 4.3(2.06)    |     |                    |                    |        |            |              |
| pulmonary vascular disorder   | 4  | 7.95(2.97, 21.29)  | 7.95(2.98, 21.18)  | 24.11  | 2.98(1.71) | 7.89(3.46)   |     |                    |                    |        |            |              |
| chylothorax                   | 4  | 6.04(2.26, 16.15)  | 6.04(2.27, 16.09)  | 16.72  | 2.59(1.32) | 6.01(2.64)   |     |                    |                    |        |            |              |
| pleural adhesion              | 3  | 14.31(4.57, 44.75) | 14.31(4.59, 44.6)  | 36.55  | 3.82(2.39) | 14.1(5.43)   |     |                    |                    |        |            |              |
| neonatal respiratory acidosis | 3  | 18.59(5.93, 58.3)  | 18.59(5.96, 57.94) | 48.92  | 4.19(2.76) | 18.24(7.01)  |     |                    |                    |        |            |              |
| oxygen therapy                | 13 | 9.2(5.33, 15.89)   | 9.2(5.31, 15.93)   | 94.06  | 3.19(2.43) | 9.12(5.77)   |     |                    |                    |        |            |              |
| resuscitation                 | 8  | 4.7(2.35, 9.41)    | 4.7(2.37, 9.33)    | 23.17  | 2.23(1.28) | 4.68(2.62)   |     |                    |                    |        |            |              |
| life support                  | 7  | 11.68(5.54, 24.61) | 11.68(5.55, 24.6)  | 67.47  | 3.53(2.52) | 11.54(6.18)  |     |                    |                    |        |            |              |
| intensive care                | 7  | 5.72(2.72, 12.02)  | 5.72(2.72, 12.05)  | 27.08  | 2.51(1.5)  | 5.69(3.05)   |     |                    |                    |        |            |              |
| fluid replacement             | 6  | 17.08(7.62, 38.3)  | 17.08(7.65, 38.15) | 89.14  | 4.07(2.99) | 16.78(8.54)  |     |                    |                    |        |            |              |
| drug detoxification           | 6  | 6.51(2.91, 14.52)  | 6.51(2.91, 14.54)  | 27.76  | 2.69(1.62) | 6.47(3.3)    |     |                    |                    |        |            |              |
| analgesic therapy             | 6  | 28.61(12.6, 64.49) | 28.61(12.8, 63.9)  | 155.01 | 4.8(3.71)  | 27.77(14.07) |     |                    |                    |        |            |              |

|                                           |    |                       |                       |        |            |               |     |                   |                  |        |            |            |
|-------------------------------------------|----|-----------------------|-----------------------|--------|------------|---------------|-----|-------------------|------------------|--------|------------|------------|
| spinal laminectomy                        | 5  | 5.19(2.15, 12.49)     | 5.19(2.15, 12.54)     | 16.8   | 2.37(1.21) | 5.16(2.47)    |     |                   |                  |        |            |            |
| therapeutic embolisation                  | 4  | 12.48(4.65, 33.47)    | 12.48(4.68, 33.25)    | 41.66  | 3.62(2.35) | 12.32(5.4)    |     |                   |                  |        |            |            |
| rest regimen                              | 4  | 151.81(52.67, 437.53) | 151.8(52.68, 437.45)  | 513.61 | 7.03(5.66) | 130.25(53.72) |     |                   |                  |        |            |            |
| drug therapy                              | 4  | 18.22(6.77, 49.01)    | 18.22(6.84, 48.55)    | 63.81  | 4.16(2.88) | 17.88(7.81)   |     |                   |                  |        |            |            |
| coccygectomy                              | 3  | 248.41(69.3, 890.44)  | 248.39(69.48, 888.03) | 580.79 | 7.61(6.02) | 195.38(67.14) |     |                   |                  |        |            |            |
| palliative sedation                       | 3  | 151.8(44.71, 515.37)  | 151.8(45.03, 511.71)  | 385.21 | 7.03(5.49) | 130.25(46.84) |     |                   |                  |        |            |            |
| sleep disorder therapy                    | 3  | 26.79(8.5, 84.45)     | 26.79(8.43, 85.15)    | 72.35  | 4.7(3.26)  | 26.05(9.97)   |     |                   |                  |        |            |            |
| pneumonia aspiration                      | 77 | 3.13(2.5, 3.91)       | 3.12(2.51, 3.87)      | 110.78 | 1.64(1.32) | 3.12(2.58)    | 136 | 3.53(2.98, 4.18)  | 3.53(2.96, 4.21) | 244.96 | 1.81(1.57) | 3.51(3.05) |
| hepatitis c                               | 52 | 4.05(3.08, 5.31)      | 4.04(3.07, 5.32)      | 118.57 | 2.01(1.62) | 4.03(3.21)    |     |                   |                  |        |            |            |
| systemic infection                        | 8  | 4.69(2.34, 9.39)      | 4.69(2.36, 9.31)      | 23.07  | 2.22(1.28) | 4.67(2.61)    |     |                   |                  |        |            |            |
| extradural abscess                        | 7  | 9.04(4.3, 19.04)      | 9.04(4.29, 19.04)     | 49.58  | 3.16(2.16) | 8.96(4.81)    |     |                   |                  |        |            |            |
| spinal cord infection                     | 7  | 11.29(5.36, 23.78)    | 11.28(5.36, 23.76)    | 64.81  | 3.48(2.47) | 11.16(5.98)   |     |                   |                  |        |            |            |
| lower respiratory tract infection viral   | 6  | 12.95(5.79, 28.99)    | 12.95(5.8, 28.92)     | 65.23  | 3.68(2.6)  | 12.78(6.51)   | 5   | 6.87(2.84, 16.59) | 6.87(2.84, 16.6) | 24.77  | 2.77(1.6)  | 6.8(3.25)  |
| human immunodeficiency virus transmission | 4  | 15.91(5.92, 42.76)    | 15.91(5.97, 42.39)    | 54.93  | 3.97(2.69) | 15.65(6.84)   |     |                   |                  |        |            |            |
| endometritis                              | 4  | 6.13(2.29, 16.4)      | 6.13(2.3, 16.33)      | 17.07  | 2.61(1.34) | 6.1(2.68)     |     |                   |                  |        |            |            |
| respiratory tract infection bacterial     | 3  | 5.94(1.91, 18.49)     | 5.94(1.91, 18.51)     | 12.24  | 2.56(1.14) | 5.91(2.28)    |     |                   |                  |        |            |            |
| vascular access site infection            | 3  | 35.95(11.34, 113.97)  | 35.95(11.31, 114.27)  | 98.07  | 5.11(3.66) | 34.62(13.19)  |     |                   |                  |        |            |            |
| congenital anomaly                        | 58 | 7.49(5.79, 9.71)      | 7.49(5.81, 9.66)      | 323.41 | 2.89(2.52) | 7.43(5.99)    |     |                   |                  |        |            |            |
| spina bifida                              | 24 | 10.84(7.25, 16.21)    | 10.84(7.18, 16.36)    | 211.8  | 3.42(2.85) | 10.72(7.66)   |     |                   |                  |        |            |            |
| multiple congenital abnormalities         | 9  | 5.85(3.04, 11.26)     | 5.85(3.06, 11.17)     | 35.93  | 2.54(1.64) | 5.82(3.36)    |     |                   |                  |        |            |            |
| hypermobility syndrome                    | 6  | 12.51(5.59, 27.99)    | 12.5(5.6, 27.92)      | 62.65  | 3.63(2.55) | 12.35(6.29)   |     |                   |                  |        |            |            |

|                                         |    |                       |                       |        |            |               |    |                     |                     |        |            |             |  |
|-----------------------------------------|----|-----------------------|-----------------------|--------|------------|---------------|----|---------------------|---------------------|--------|------------|-------------|--|
| congenital choroid plexus cyst          | 4  | 12.61(4.7, 33.82)     | 12.61(4.73, 33.6)     | 42.16  | 3.64(2.36) | 12.45(5.45)   |    |                     |                     |        |            |             |  |
| congenital hydronephrosis               | 4  | 5.6(2.09, 14.96)      | 5.6(2.1, 14.92)       | 15.01  | 2.48(1.21) | 5.57(2.45)    |    |                     |                     |        |            |             |  |
| congenital megaureter                   | 4  | 20.7(7.68, 55.77)     | 20.7(7.62, 56.25)     | 73.32  | 4.34(3.06) | 20.26(8.84)   |    |                     |                     |        |            |             |  |
| kidney duplex                           | 4  | 17.77(6.61, 47.81)    | 17.77(6.67, 47.35)    | 62.1   | 4.13(2.85) | 17.45(7.62)   |    |                     |                     |        |            |             |  |
| congenital hearing disorder             | 4  | 25.13(9.3, 67.86)     | 25.12(9.24, 68.26)    | 90.17  | 4.61(3.33) | 24.48(10.66)  |    |                     |                     |        |            |             |  |
| faecaloma                               | 19 | 3.68(2.34, 5.77)      | 3.68(2.34, 5.78)      | 36.87  | 1.87(1.24) | 3.67(2.51)    | 33 | 4.09(2.9, 5.76)     | 4.09(2.93, 5.71)    | 76.37  | 2.02(1.54) | 4.06(3.05)  |  |
| appendicolith                           | 10 | 31.96(17.01, 60.05)   | 31.96(17.07, 59.84)   | 289.72 | 4.95(4.08) | 30.91(18.23)  |    |                     |                     |        |            |             |  |
| subileus                                | 9  | 4.18(2.17, 8.06)      | 4.18(2.19, 7.98)      | 21.71  | 2.06(1.16) | 4.17(2.41)    |    |                     |                     |        |            |             |  |
| gastrointestinal tract irritation       | 9  | 8.51(4.42, 16.41)     | 8.51(4.46, 16.25)     | 59.11  | 3.08(2.18) | 8.44(4.87)    |    |                     |                     |        |            |             |  |
| abdominal compartment syndrome          | 9  | 15.47(8, 29.9)        | 15.47(7.94, 30.12)    | 119.74 | 3.93(3.03) | 15.22(8.77)   |    |                     |                     |        |            |             |  |
| narcotic bowel syndrome                 | 8  | 51.32(25.17, 104.62)  | 51.31(25.34, 103.91)  | 373.6  | 5.6(4.63)  | 48.63(26.8)   | 8  | 32.74(16.06, 66.73) | 32.73(16.16, 66.28) | 232.99 | 4.96(3.99) | 31.04(17.1) |  |
| intestinal pseudo-obstruction           | 7  | 9.35(4.44, 19.69)     | 9.35(4.44, 19.69)     | 51.66  | 3.21(2.21) | 9.26(4.97)    | 11 | 9.43(5.2, 17.11)    | 9.43(5.24, 16.98)   | 81.54  | 3.22(2.39) | 9.29(5.64)  |  |
| faecal vomiting                         | 3  | 6.17(1.98, 19.2)      | 6.17(1.98, 19.23)     | 12.9   | 2.62(1.2)  | 6.13(2.37)    |    |                     |                     |        |            |             |  |
| needle track marks                      | 5  | 14.88(6.15, 36.02)    | 14.88(6.16, 35.95)    | 63.71  | 3.87(2.71) | 14.66(7)      | 8  | 15.34(7.6, 30.96)   | 15.34(7.58, 31.06)  | 104.49 | 3.9(2.95)  | 14.97(8.32) |  |
| pruritus allergic                       | 5  | 4.34(1.8, 10.44)      | 4.34(1.8, 10.48)      | 12.78  | 2.11(0.95) | 4.32(2.07)    | 14 | 7.81(4.61, 13.24)   | 7.81(4.6, 13.26)    | 82.08  | 2.95(2.21) | 7.72(4.97)  |  |
| adiposis dolorosa                       | 5  | 116.78(46.03, 296.29) | 116.77(46.48, 293.36) | 508.66 | 6.7(5.47)  | 103.61(47.54) |    |                     |                     |        |            |             |  |
| urticaria thermal                       | 4  | 28.46(10.5, 77)       | 28.46(10.47, 77.33)   | 102.78 | 4.79(3.5)  | 27.63(12.01)  |    |                     |                     |        |            |             |  |
| generalised bullous fixed drug eruption | 4  | 17.86(6.64, 48.04)    | 17.86(6.7, 47.59)     | 62.43  | 4.13(2.85) | 17.53(7.66)   |    |                     |                     |        |            |             |  |
| skin ulcer haemorrhage                  | 3  | 7.78(2.5, 24.26)      | 7.78(2.5, 24.25)      | 17.59  | 2.95(1.53) | 7.73(2.99)    |    |                     |                     |        |            |             |  |
| malignant cranial nerve neoplasm        | 4  | 165.61(57.07, 480.59) | 165.6(57.46, 477.22)  | 553.73 | 7.13(5.76) | 140.27(57.52) |    |                     |                     |        |            |             |  |
| retro-orbital neoplasm                  | 4  | 74.35(26.83, 206.04)  | 74.35(26.83, 206.02)  | 267.6  | 6.1(4.78)  | 68.81(29.33)  |    |                     |                     |        |            |             |  |

|                                 |     |                      |                      |         |            |                |      |                     |                     |           |            |              |
|---------------------------------|-----|----------------------|----------------------|---------|------------|----------------|------|---------------------|---------------------|-----------|------------|--------------|
| neuroblastoma recurrent         | 3   | 16.66(5.32, 52.2)    | 16.66(5.35, 51.93)   | 43.37   | 4.03(2.6)  | 16.38(6.3)     |      |                     |                     |           |            |              |
| brain stem glioma               | 3   | 19.8(6.31, 62.15)    | 19.8(6.35, 61.71)    | 52.41   | 4.28(2.84) | 19.4(7.45)     |      |                     |                     |           |            |              |
| costochondritis                 | 12  | 7.34(4.16, 12.95)    | 7.34(4.16, 12.96)    | 65.13   | 2.86(2.08) | 7.28(4.53)     |      |                     |                     |           |            |              |
| dupuytren's contracture         | 5   | 5.71(2.37, 13.75)    | 5.71(2.36, 13.79)    | 19.29   | 2.51(1.35) | 5.68(2.72)     |      |                     |                     |           |            |              |
| intervertebral disc compression | 5   | 4.7(1.95, 11.33)     | 4.7(1.95, 11.35)     | 14.51   | 2.23(1.07) | 4.69(2.25)     |      |                     |                     |           |            |              |
| rib deformity                   | 3   | 11.58(3.71, 36.16)   | 11.58(3.72, 36.09)   | 28.63   | 3.52(2.09) | 11.44(4.41)    |      |                     |                     |           |            |              |
| drug hypersensitivity           | 654 | 3.35(3.1, 3.62)      | 3.33(3.08, 3.6)      | 1063.71 | 1.73(1.62) | 3.32(3.11)     | 7364 | 26.9(26.26, 27.56)  | 24.82(24.34, 25.31) | 162013.95 | 4.58(4.54) | 23.85(23.37) |
| reaction to excipient           | 9   | 4.1(2.13, 7.89)      | 4.1(2.15, 7.83)      | 20.99   | 2.03(1.13) | 4.08(2.36)     |      |                     |                     |           |            |              |
| secondary amyloidosis           | 3   | 21.02(6.69, 66.03)   | 21.02(6.74, 65.51)   | 55.91   | 4.36(2.93) | 20.57(7.89)    |      |                     |                     |           |            |              |
| allergy to metals               | 3   | 5.24(1.69, 16.32)    | 5.24(1.68, 16.33)    | 10.25   | 2.38(0.96) | 5.22(2.02)     |      |                     |                     |           |            |              |
| miosis                          | 52  | 6.82(5.19, 8.97)     | 6.82(5.18, 8.97)     | 256.35  | 2.76(2.37) | 6.78(5.39)     | 235  | 20.24(17.77, 23.06) | 20.19(17.6, 23.16)  | 4143.35   | 4.29(4.1)  | 19.55(17.53) |
| vision abnormal neonatal        | 35  | 83.28(58.91, 117.73) | 83.23(58.49, 118.44) | 2605.4  | 6.25(5.76) | 76.34(57.14)   | 19   | 27.67(17.46, 43.85) | 27.67(17.63, 43.43) | 466.17    | 4.73(4.08) | 26.46(18)    |
| orbital oedema                  | 4   | 7.8(2.92, 20.87)     | 7.8(2.93, 20.78)     | 23.52   | 2.95(1.68) | 7.74(3.4)      |      |                     |                     |           |            |              |
| hypoesthesia eye                | 4   | 7.09(2.65, 18.96)    | 7.09(2.66, 18.89)    | 20.75   | 2.82(1.55) | 7.04(3.09)     |      |                     |                     |           |            |              |
| vein collapse                   | 8   | 10.88(5.42, 21.84)   | 10.87(5.37, 22.01)   | 70.89   | 3.43(2.48) | 10.76(6)       |      |                     |                     |           |            |              |
| foreign body embolism           | 7   | 277.23(118.95, .95)  | 277.19(119.33, .33)  | 1476.89 | 7.73(6.61) | 212.75(104.81) |      |                     |                     |           |            |              |
| arterial insufficiency          | 3   | 15.01(4.8, 46.99)    | 15.01(4.82, 46.78)   | 38.6    | 3.89(2.46) | 14.79(5.69)    |      |                     |                     |           |            |              |
| vaginal flatulence              | 6   | 21.18(9.43, 47.59)   | 21.18(9.48, 47.31)   | 112.75  | 4.37(3.29) | 20.72(10.53)   | 5    | 11.22(4.63, 27.18)  | 11.22(4.64, 27.1)   | 45.65     | 3.46(2.3)  | 11.02(5.26)  |
| adnexal torsion                 | 3   | 10.27(3.29, 32.06)   | 10.27(3.3, 32.01)    | 24.83   | 3.35(1.92) | 10.17(3.92)    |      |                     |                     |           |            |              |
| urinary tract discomfort        | 4   | 9.39(3.51, 25.15)    | 9.39(3.52, 25.02)    | 29.68   | 3.22(1.95) | 9.3(4.08)      |      |                     |                     |           |            |              |
| renal artery thrombosis         | 3   | 10.08(3.23, 31.46)   | 10.08(3.23, 31.42)   | 24.28   | 3.32(1.9)  | 9.98(3.85)     |      |                     |                     |           |            |              |

|                                           |    |                     |                      |         |            |              |     |                     |                     |                                   |
|-------------------------------------------|----|---------------------|----------------------|---------|------------|--------------|-----|---------------------|---------------------|-----------------------------------|
| weight decrease neonatal                  | 4  | 19.91(7.39, 53.62)  | 19.91(7.33, 54.1)    | 70.3    | 4.29(3)    | 19.5(8.51)   |     |                     |                     |                                   |
| protein deficiency                        | 4  | 13.59(5.06, 36.49)  | 13.59(5.1, 36.21)    | 45.98   | 3.75(2.47) | 13.41(5.87)  |     |                     |                     |                                   |
| congestive hepatopathy                    | 3  | 7.61(2.44, 23.71)   | 7.61(2.44, 23.72)    | 17.08   | 2.92(1.5)  | 7.56(2.92)   |     |                     |                     |                                   |
| carcinoid syndrome                        | 3  | 8.06(2.59, 25.12)   | 8.06(2.59, 25.12)    | 18.39   | 3(1.58)    | 8(3.09)      |     |                     |                     |                                   |
| neonatal hypoacusis                       | 21 | 91.11(58.17, 142.7) | 91.08(58.03, 142.96) | 1700.79 | 6.37(5.74) | 82.89(56.95) | 5   | 12.85(5.3, 31.19)   | 12.85(5.32, 31.04)  | 53.48 3.66(2.49) 12.6(6)          |
| cardiac ventricular disorder              | 3  | 7.13(2.29, 22.22)   | 7.13(2.29, 22.22)    | 15.7    | 2.83(1.4)  | 7.09(2.74)   |     |                     |                     |                                   |
| hypersplenism                             | 5  | 10.19(4.22, 24.6)   | 10.19(4.22, 24.62)   | 40.97   | 3.33(2.17) | 10.09(4.82)  |     |                     |                     |                                   |
| drug screen positive                      |    |                     |                      |         |            |              | 135 | 11.29(9.52, 13.38)  | 11.27(9.45, 13.44)  | 1239.73 3.47(3.22) 11.08(9.6)     |
| blood pressure systolic increased         |    |                     |                      |         |            |              | 112 | 3.66(3.04, 4.4)     | 3.65(3.06, 4.35)    | 214.62 1.86(1.6) 3.64(3.11)       |
| body temperature decreased                |    |                     |                      |         |            |              | 69  | 4.36(3.44, 5.52)    | 4.36(3.45, 5.52)    | 177.09 2.11(1.78) 4.33(3.55)      |
| blood pressure diastolic decreased        |    |                     |                      |         |            |              | 55  | 4.66(3.57, 6.07)    | 4.66(3.54, 6.13)    | 156.64 2.21(1.83) 4.63(3.71)      |
| product residue present                   |    |                     |                      |         |            |              | 44  | 5.86(4.35, 7.88)    | 5.85(4.36, 7.85)    | 175.34 2.54(2.11) 5.81(4.53)      |
| blood pressure diastolic increased        |    |                     |                      |         |            |              | 31  | 4.33(3.04, 6.17)    | 4.33(3.04, 6.16)    | 78.89 2.11(1.61) 4.31(3.21)       |
| creatinine renal clearance decreased      |    |                     |                      |         |            |              | 25  | 3.77(2.55, 5.59)    | 3.77(2.55, 5.58)    | 50.64 1.91(1.35) 3.76(2.7)        |
| blood pressure systolic decreased         |    |                     |                      |         |            |              | 23  | 3.27(2.17, 4.92)    | 3.27(2.17, 4.94)    | 35.96 1.7(1.12) 3.25(2.31)        |
| foetal non-stress test abnormal           |    |                     |                      |         |            |              | 21  | 329.84(193.07, .07, | 329.77(194.26, .26, | 4390.98 7.72(7.01) 210.73(134.62) |
| electroencephalogram abnormal             |    |                     |                      |         |            |              | 18  | 3.52(2.22, 5.6)     | 3.52(2.2, 5.63)     | 32.3 1.81(1.16) 3.51(2.38)        |
| blood bicarbonate decreased               |    |                     |                      |         |            |              | 17  | 5.7(3.53, 9.19)     | 5.7(3.56, 9.12)     | 65.18 2.5(1.83) 5.65(3.79)        |
| drug screen false positive                |    |                     |                      |         |            |              | 16  | 3.47(2.13, 5.68)    | 3.47(2.13, 5.66)    | 28.02 1.79(1.1) 3.46(2.29)        |
| blood creatine phosphokinase mb increased |    |                     |                      |         |            |              | 13  | 5.99(3.47, 10.34)   | 5.99(3.46, 10.37)   | 53.43 2.57(1.81) 5.93(3.76)       |
| blood alcohol increased                   |    |                     |                      |         |            |              | 12  | 9.19(5.19, 16.25)   | 9.19(5.21, 16.22)   | 86.18 3.18(2.39) 9.06(5.62)       |

|                                                                    |     |                       |                        |         |            |               |
|--------------------------------------------------------------------|-----|-----------------------|------------------------|---------|------------|---------------|
| blood ph increased                                                 | 9   | 9.83(5.09, 19)        | 9.83(5.05, 19.14)      | 70.19   | 3.28(2.37) | 9.68(5.58)    |
| electrocardiogram st segment abnormal                              | 9   | 7.13(3.7, 13.77)      | 7.13(3.66, 13.88)      | 46.89   | 2.82(1.92) | 7.06(4.07)    |
| foetal heart rate abnormal                                         | 9   | 6.09(3.16, 11.74)     | 6.09(3.13, 11.86)      | 37.87   | 2.59(1.69) | 6.03(3.48)    |
| transcranial electrical motor evoked potential monitoring abnormal | 8   | 309.9(131.39, 730.96) | 309.88(130.82, 734.06) | 1606.32 | 7.66(6.56) | 202.44(98.73) |
| anti-cyclic citrullinated peptide antibody                         | 8   | 9.35(4.65, 18.81)     | 9.35(4.62, 18.93)      | 58.73   | 3.2(2.25)  | 9.22(5.14)    |
| pco2 decreased                                                     | 7   | 4.28(2.03, 9)         | 4.28(2.03, 9.01)       | 17.45   | 2.09(1.08) | 4.25(2.28)    |
| neurological examination abnormal                                  | 6   | 7.98(3.56, 17.86)     | 7.98(3.57, 17.82)      | 36.12   | 2.98(1.9)  | 7.88(4.02)    |
| blood albumin increased                                            | 6   | 4.28(1.92, 9.56)      | 4.28(1.92, 9.56)       | 14.99   | 2.09(1.02) | 4.26(2.17)    |
| blood ethanol increased                                            | 5   | 14.38(5.92, 34.93)    | 14.38(5.95, 34.74)     | 60.75   | 3.81(2.64) | 14.06(6.69)   |
| analgesic drug level above therapeutic drug level                  | 5   | 22.01(9.01, 53.76)    | 22.01(8.93, 54.22)     | 96.61   | 4.41(3.23) | 21.24(10.06)  |
| po2 abnormal                                                       | 5   | 50.97(20.43, 127.16)  | 50.97(20.29, 128.05)   | 225.18  | 5.55(4.34) | 46.94(21.84)  |
| blood bicarbonate increased                                        | 4   | 47.43(17.12, 131.44)  | 47.43(17.12, 131.43)   | 168.08  | 5.46(4.14) | 43.93(18.72)  |
| grip strength                                                      | 4   | 5.09(1.9, 13.61)      | 5.09(1.91, 13.56)      | 13.01   | 2.34(1.06) | 5.05(2.22)    |
| electrocardiogram pr shortened                                     | 4   | 14.17(5.26, 38.21)    | 14.17(5.21, 38.5)      | 47.8    | 3.79(2.51) | 13.86(6.04)   |
| pco2 abnormal                                                      | 3   | 9.27(2.96, 29.01)     | 9.27(2.97, 28.89)      | 21.79   | 3.19(1.76) | 9.14(3.52)    |
| band neutrophil count increased                                    | 3   | 37.09(11.54, 119.16)  | 37.09(11.44, 120.22)   | 99.02   | 5.13(3.66) | 34.92(13.15)  |
| benzodiazepine drug level increased                                | 3   | 9.27(2.96, 29.01)     | 9.27(2.97, 28.89)      | 21.79   | 3.19(1.76) | 9.14(3.52)    |
| somnolence                                                         | 3   | 21.79(6.88, 69)       | 21.79(6.86, 69.26)     | 57.35   | 4.39(2.95) | 21.04(8.02)   |
| coma                                                               | 948 | 3.06(2.87, 3.26)      | 3.04(2.87, 3.22)       | 1291.38 | 1.6(1.5)   | 3.02(2.87)    |
|                                                                    | 444 | 6.01(5.47, 6.6)       | 5.99(5.43, 6.61)       | 1826.81 | 2.57(2.43) | 5.94(5.49)    |

|                                  |     |                      |                      |        |            |              |
|----------------------------------|-----|----------------------|----------------------|--------|------------|--------------|
| lethargy                         | 299 | 3.32(2.96, 3.72)     | 3.31(2.94, 3.72)     | 480.13 | 1.72(1.56) | 3.3(3)       |
| brain oedema                     | 89  | 4.58(3.72, 5.64)     | 4.58(3.69, 5.68)     | 246.77 | 2.19(1.89) | 4.55(3.82)   |
| leukoencephalopathy              | 38  | 6.44(4.67, 8.86)     | 6.43(4.7, 8.8)       | 172.47 | 2.67(2.22) | 6.37(4.88)   |
| areflexia                        | 32  | 7.53(5.31, 10.68)    | 7.53(5.29, 10.72)    | 178.91 | 2.9(2.4)   | 7.45(5.56)   |
| hypoxic-ischaemic encephalopathy | 30  | 7.43(5.18, 10.65)    | 7.43(5.22, 10.57)    | 164.74 | 2.88(2.37) | 7.35(5.43)   |
| cerebrospinal fluid leakage      | 29  | 10.56(7.31, 15.25)   | 10.56(7.28, 15.32)   | 246.44 | 3.38(2.86) | 10.39(7.64)  |
| spinal cord compression          | 28  | 4.52(3.12, 6.56)     | 4.52(3.11, 6.56)     | 76.21  | 2.17(1.64) | 4.49(3.29)   |
| hyperreflexia                    | 21  | 3.73(2.43, 5.73)     | 3.73(2.42, 5.74)     | 41.7   | 1.89(1.29) | 3.71(2.59)   |
| paraplegia                       | 17  | 3.79(2.35, 6.1)      | 3.79(2.37, 6.07)     | 34.65  | 1.91(1.25) | 3.77(2.53)   |
| brain hypoxia                    | 13  | 8.2(4.74, 14.18)     | 8.2(4.74, 14.2)      | 81.06  | 3.02(2.26) | 8.1(5.12)    |
| paraparesis                      | 12  | 4.24(2.41, 7.49)     | 4.24(2.4, 7.49)      | 29.54  | 2.08(1.29) | 4.22(2.62)   |
| consciousness fluctuating        | 10  | 6.45(3.46, 12.03)    | 6.45(3.44, 12.08)    | 45.53  | 2.68(1.82) | 6.39(3.79)   |
| slow response to stimuli         | 9   | 4.58(2.38, 8.82)     | 4.58(2.4, 8.75)      | 24.98  | 2.19(1.29) | 4.55(2.63)   |
| anterior spinal artery syndrome  | 9   | 73.66(36.81, 147.37) | 73.65(37.09, 146.25) | 572.41 | 6.03(5.09) | 65.48(36.65) |
| cauda equina syndrome            | 6   | 5.08(2.28, 11.35)    | 5.08(2.27, 11.35)    | 19.5   | 2.34(1.26) | 5.05(2.58)   |
| amnesic disorder                 | 6   | 7.98(3.56, 17.86)    | 7.98(3.57, 17.82)    | 36.12  | 2.98(1.9)  | 7.88(4.02)   |
| clonic convulsion                | 5   | 4.39(1.82, 10.58)    | 4.39(1.82, 10.61)    | 12.98  | 2.13(0.97) | 4.36(2.09)   |
| brain stem syndrome              | 5   | 4.3(1.79, 10.37)     | 4.3(1.78, 10.39)     | 12.59  | 2.1(0.94)  | 4.28(2.05)   |
| anaesthesia                      | 3   | 5.38(1.73, 16.77)    | 5.38(1.73, 16.77)    | 10.6   | 2.42(0.99) | 5.34(2.06)   |
| piriformis syndrome              | 3   | 11.78(3.76, 36.94)   | 11.78(3.78, 36.72)   | 29     | 3.53(2.1)  | 11.56(4.44)  |
| radicular pain                   | 3   | 5.35(1.72, 16.67)    | 5.35(1.72, 16.67)    | 10.5   | 2.41(0.99) | 5.31(2.05)   |

|                                         |     |                       |                      |        |            |               |
|-----------------------------------------|-----|-----------------------|----------------------|--------|------------|---------------|
| somnolence neonatal                     | 3   | 9.74(3.11, 30.48)     | 9.74(3.13, 30.36)    | 23.13  | 3.26(1.83) | 9.59(3.69)    |
| spinal cord oedema                      | 3   | 5.22(1.67, 16.26)     | 5.22(1.67, 16.27)    | 10.14  | 2.37(0.95) | 5.18(2)       |
| dreamy state                            | 3   | 5.73(1.84, 17.88)     | 5.73(1.84, 17.86)    | 11.61  | 2.51(1.08) | 5.69(2.2)     |
| phantom limb syndrome                   | 3   | 11.25(3.59, 35.25)    | 11.25(3.61, 35.06)   | 27.47  | 3.47(2.03) | 11.05(4.25)   |
| infant sedation                         | 3   | 124.51(35.78, 433.27) | 124.5(35.51, 436.46) | 302.68 | 6.68(5.12) | 102.71(36.18) |
| completed suicide                       | 642 | 4.88(4.52, 5.28)      | 4.86(4.49, 5.26)     | 1952.1 | 2.27(2.16) | 4.82(4.52)    |
| hallucination                           | 414 | 3.62(3.29, 3.99)      | 3.61(3.27, 3.98)     | 777.08 | 1.85(1.71) | 3.59(3.31)    |
| suspected suicide                       | 58  | 10.59(8.16, 13.73)    | 10.58(8.2, 13.65)    | 494.18 | 3.38(3.01) | 10.41(8.38)   |
| adjustment disorder with depressed mood | 10  | 4.04(2.17, 7.53)      | 4.04(2.16, 7.56)     | 22.72  | 2.01(1.15) | 4.02(2.39)    |
| perseveration                           | 8   | 29.24(14.37, 59.48)   | 29.23(14.43, 59.19)  | 207.69 | 4.8(3.83)  | 27.88(15.39)  |
| psychotic behaviour                     | 8   | 4.87(2.43, 9.77)      | 4.87(2.4, 9.86)      | 24.42  | 2.28(1.33) | 4.84(2.7)     |
| trance                                  | 8   | 13.88(6.88, 27.98)    | 13.88(6.85, 28.11)   | 93.35  | 3.76(2.81) | 13.57(7.55)   |
| hallucination, tactile                  | 6   | 6.06(2.71, 13.55)     | 6.06(2.71, 13.54)    | 25.1   | 2.59(1.51) | 6.01(3.07)    |
| delusional perception                   | 5   | 7.71(3.19, 18.62)     | 7.71(3.19, 18.63)    | 28.8   | 2.93(1.77) | 7.62(3.64)    |
| posturing                               | 5   | 5.92(2.45, 14.28)     | 5.92(2.45, 14.3)     | 20.22  | 2.55(1.39) | 5.87(2.81)    |
| suicide threat                          | 5   | 9.34(3.86, 22.6)      | 9.34(3.87, 22.56)    | 36.65  | 3.2(2.04)  | 9.21(4.4)     |
| belligerence                            | 4   | 5.57(2.08, 14.92)     | 5.57(2.09, 14.84)    | 14.87  | 2.47(1.2)  | 5.53(2.43)    |
| delirium tremens                        | 4   | 5.93(2.21, 15.88)     | 5.93(2.23, 15.8)     | 16.22  | 2.56(1.28) | 5.88(2.58)    |
| time perception altered                 | 4   | 7.31(2.73, 19.59)     | 7.31(2.74, 19.48)    | 21.51  | 2.85(1.58) | 7.23(3.17)    |
| helplessness                            | 4   | 5.27(1.97, 14.1)      | 5.27(1.98, 14.04)    | 13.71  | 2.39(1.12) | 5.23(2.3)     |
| neologism                               | 3   | 91.74(27.15, 310.03)  | 91.74(27.21, 309.25) | 232.54 | 6.31(4.78) | 79.37(28.65)  |

|                                                       |      |                           |                           |         |            |                  |
|-------------------------------------------------------|------|---------------------------|---------------------------|---------|------------|------------------|
| mental disorder due to a<br>general medical condition | 3    | 6.18(1.98,<br>19.28)      | 6.18(1.98,<br>19.26)      | 12.89   | 2.62(1.19) | 6.13(2.36)       |
| autophobia                                            | 3    | 7.48(2.4,<br>23.37)       | 7.48(2.4,<br>23.31)       | 16.63   | 2.89(1.46) | 7.4(2.85)        |
| toxicity to various agents                            | 1385 | 5.56(5.27,<br>5.87)       | 5.49(5.18,<br>5.82)       | 5056.68 | 2.45(2.37) | 5.45(5.21)       |
| medication error                                      | 264  | 3.1(2.75,<br>3.5)         | 3.09(2.75,<br>3.48)       | 372.41  | 1.62(1.45) | 3.08(2.79)       |
| poisoning                                             | 170  | 8.55(7.34,<br>9.94)       | 8.53(7.29,<br>9.98)       | 1114.1  | 3.07(2.86) | 8.42(7.42)       |
| poisoning deliberate                                  | 59   | 4.63(3.58,<br>5.98)       | 4.63(3.59,<br>5.97)       | 166.57  | 2.2(1.84)  | 4.6(3.71)        |
| subdural haemorrhage                                  | 36   | 8.29(5.96,<br>11.52)      | 8.28(5.93,<br>11.55)      | 227.33  | 3.03(2.56) | 8.18(6.21)       |
| gun shot wound                                        | 19   | 6.22(3.96,<br>9.78)       | 6.22(3.96,<br>9.76)       | 82.41   | 2.62(1.99) | 6.17(4.22)       |
| anaesthetic complication                              | 18   | 4.27(2.69,<br>6.79)       | 4.27(2.67,<br>6.83)       | 44.79   | 2.09(1.44) | 4.25(2.88)       |
| maternal exposure during<br>delivery                  | 14   | 11.62(6.85,<br>19.73)     | 11.62(6.85,<br>19.73)     | 133.23  | 3.51(2.77) | 11.41(7.33<br>)  |
| vasoplegia syndrome                                   | 14   | 6.35(3.75,<br>10.75)      | 6.35(3.74,<br>10.78)      | 62.42   | 2.65(1.92) | 6.29(4.05)       |
| procedural hypotension                                | 13   | 9.35(5.4,<br>16.17)       | 9.35(5.4,<br>16.19)       | 95.38   | 3.2(2.44)  | 9.22(5.83)       |
| transcription medication error                        | 12   | 4.77(2.7,<br>8.42)        | 4.77(2.7,<br>8.42)        | 35.45   | 2.24(1.46) | 4.74(2.95)       |
| carbon monoxide poisoning                             | 10   | 14.98(7.99,<br>28.06)     | 14.97(8,<br>28.03)        | 127.14  | 3.87(3.01) | 14.62(8.65<br>)  |
| mechanical ventilation<br>complication                | 10   | 48.02(25.2,<br>91.53)     | 48.02(25.1<br>5, 91.69)   | 425.24  | 5.47(4.59) | 44.43(25.9<br>)  |
| dislocation of vertebra                               | 10   | 3.78(2.03,<br>7.04)       | 3.78(2.02,<br>7.08)       | 20.32   | 1.91(1.06) | 3.76(2.24)       |
| deep vein thrombosis<br>postoperative                 | 10   | 4.48(2.4,<br>8.35)        | 4.48(2.39,<br>8.39)       | 26.82   | 2.15(1.3)  | 4.45(2.65)       |
| delayed recovery from<br>anaesthesia                  | 8    | 5.61(2.8,<br>11.26)       | 5.61(2.77,<br>11.36)      | 30.04   | 2.48(1.53) | 5.57(3.11)       |
| post lumbar puncture<br>syndrome                      | 8    | 4.83(2.41,<br>9.69)       | 4.83(2.39,<br>9.78)       | 24.11   | 2.26(1.32) | 4.8(2.68)        |
| obstetric procedure<br>complication                   | 6    | 120.22(49.<br>91, 289.57) | 120.21(49.<br>76, 290.39) | 587.72  | 6.64(5.47) | 99.77(47.8<br>2) |
| drug monitoring procedure<br>incorrectly performed    | 6    | 6.2(2.77,<br>13.87)       | 6.2(2.78,<br>13.85)       | 25.91   | 2.62(1.54) | 6.15(3.14)       |

|                                 |    |                      |                       |         |            |               |
|---------------------------------|----|----------------------|-----------------------|---------|------------|---------------|
| procedural nausea               | 5  | 4.32(1.79, 10.41)    | 4.32(1.79, 10.44)     | 12.65   | 2.1(0.94)  | 4.29(2.06)    |
| procedural vomiting             | 5  | 5.01(2.08, 12.08)    | 5.01(2.07, 12.1)      | 15.91   | 2.31(1.15) | 4.97(2.38)    |
| exposure to contaminated device | 4  | 9.41(3.5, 25.27)     | 9.41(3.53, 25.07)     | 29.58   | 3.21(1.94) | 9.28(4.06)    |
| environmental exposure          | 3  | 8.72(2.79, 27.25)    | 8.72(2.8, 27.18)      | 20.19   | 3.1(1.68)  | 8.6(3.31)     |
| thermal burns of eye            | 3  | 10.89(3.48, 34.14)   | 10.89(3.49, 33.94)    | 26.46   | 3.42(1.99) | 10.71(4.12)   |
| hypothermia                     | 83 | 5.34(4.3, 6.63)      | 5.33(4.3, 6.61)       | 289.67  | 2.4(2.09)  | 5.29(4.42)    |
| brain death                     | 32 | 6.6(4.66, 9.35)      | 6.6(4.64, 9.39)       | 150.21  | 2.71(2.21) | 6.53(4.88)    |
| injection site granuloma        | 24 | 82.53(53.82, 126.57) | 82.51(53.61, 126.99)  | 1692.25 | 6.18(5.58) | 72.38(50.61)  |
| foaming at mouth                | 14 | 4.44(2.63, 7.52)     | 4.44(2.62, 7.54)      | 37.06   | 2.14(1.41) | 4.42(2.84)    |
| implant site extravasation      | 13 | 9.99(5.77, 17.29)    | 9.99(5.77, 17.29)     | 103.41  | 3.3(2.54)  | 9.84(6.22)    |
| moaning                         | 12 | 6.99(3.96, 12.36)    | 6.99(3.96, 12.34)     | 60.9    | 2.79(2)    | 6.92(4.3)     |
| catheter site granuloma         | 8  | 119.19(55.7, 255.06) | 119.18(55.49, 255.96) | 777.95  | 6.63(5.6)  | 99.07(52.42)  |
| infusion site granuloma         | 6  | 217.9(85.26, 556.86) | 217.88(85.04, 558.22) | 942.05  | 7.31(6.09) | 158.73(72.39) |
| infusion site urticaria         | 5  | 5.59(2.32, 13.48)    | 5.59(2.31, 13.5)      | 18.65   | 2.47(1.31) | 5.54(2.65)    |
| implant site discharge          | 5  | 8.67(3.59, 20.97)    | 8.67(3.59, 20.94)     | 33.44   | 3.1(1.93)  | 8.56(4.09)    |
| haemorrhagic cyst               | 5  | 8.21(3.39, 19.84)    | 8.21(3.4, 19.83)      | 31.2    | 3.02(1.85) | 8.11(3.87)    |
| device intolerance              | 4  | 11.28(4.19, 30.35)   | 11.28(4.23, 30.06)    | 36.77   | 3.47(2.19) | 11.09(4.84)   |
| medical device site erythema    | 3  | 16.44(5.22, 51.81)   | 16.44(5.17, 52.25)    | 42.32   | 4(2.56)    | 16.02(6.13)   |
| tachyphylaxis                   | 3  | 5.27(1.69, 16.41)    | 5.27(1.69, 16.43)     | 10.27   | 2.39(0.96) | 5.23(2.02)    |
| pulmonary congestion            | 88 | 4.22(3.42, 5.2)      | 4.21(3.39, 5.22)      | 214.22  | 2.07(1.77) | 4.19(3.52)    |
| acute chest syndrome            | 79 | 62.33(49.42, 78.62)  | 62.28(49.23, 78.79)   | 4302.29 | 5.82(5.48) | 56.35(46.4)   |

|                                 |    |                    |                    |        |            |              |
|---------------------------------|----|--------------------|--------------------|--------|------------|--------------|
| aspiration                      | 78 | 4.75(3.8, 5.93)    | 4.74(3.82, 5.88)   | 228.61 | 2.24(1.92) | 4.71(3.91)   |
| asphyxia                        | 75 | 5.9(4.7, 7.41)     | 5.9(4.66, 7.46)    | 302.23 | 2.55(2.22) | 5.85(4.84)   |
| rhonchi                         | 16 | 7.24(4.42, 11.85)  | 7.23(4.43, 11.8)   | 84.91  | 2.84(2.15) | 7.16(4.74)   |
| infantile apnoea                | 13 | 10.95(6.32, 18.95) | 10.95(6.33, 18.96) | 115.32 | 3.43(2.66) | 10.76(6.8)   |
| obliterative bronchiolitis      | 12 | 5.81(3.29, 10.26)  | 5.81(3.29, 10.26)  | 47.32  | 2.53(1.74) | 5.76(3.58)   |
| respiratory paralysis           | 6  | 24.9(11, 56.38)    | 24.9(10.93, 56.72) | 131.99 | 4.58(3.49) | 23.92(12.07) |
| neonatal respiratory depression | 6  | 11.74(5.23, 26.34) | 11.74(5.26, 26.22) | 57.77  | 3.53(2.45) | 11.53(5.86)  |
| paranasal cyst                  | 6  | 17.7(7.85, 39.87)  | 17.7(7.92, 39.53)  | 91.72  | 4.1(3.02)  | 17.2(8.72)   |
| irregular breathing             | 5  | 5.89(2.44, 14.22)  | 5.89(2.44, 14.23)  | 20.11  | 2.55(1.39) | 5.84(2.8)    |
| anoxia                          | 4  | 6.94(2.59, 18.59)  | 6.94(2.6, 18.49)   | 20.09  | 2.78(1.51) | 6.87(3.01)   |
| pneumonitis aspiration          | 4  | 10.56(3.93, 28.4)  | 10.56(3.96, 28.14) | 34.02  | 3.38(2.1)  | 10.39(4.54)  |
| cheyne-stokes respiration       | 3  | 7.48(2.4, 23.37)   | 7.48(2.4, 23.31)   | 16.63  | 2.89(1.46) | 7.4(2.85)    |
| implant site infection          | 16 | 4.29(2.63, 7.02)   | 4.29(2.63, 7)      | 40.13  | 2.09(1.41) | 4.27(2.83)   |
| retinitis                       | 15 | 7.94(4.77, 13.21)  | 7.94(4.77, 13.22)  | 89.73  | 2.97(2.26) | 7.84(5.12)   |
| lupus vulgaris                  | 13 | 11.66(6.73, 20.19) | 11.66(6.74, 20.19) | 124.16 | 3.52(2.75) | 11.45(7.23)  |
| mastoiditis                     | 8  | 5.42(2.7, 10.88)   | 5.42(2.68, 10.98)  | 28.6   | 2.43(1.48) | 5.38(3.01)   |
| abscess jaw                     | 7  | 4.11(1.95, 8.64)   | 4.11(1.95, 8.66)   | 16.35  | 2.03(1.03) | 4.09(2.19)   |
| lymph gland infection           | 5  | 7.02(2.91, 16.95)  | 7.02(2.91, 16.96)  | 25.49  | 2.8(1.63)  | 6.95(3.32)   |
| meningitis herpes               | 4  | 15.7(5.82, 42.4)   | 15.7(5.78, 42.66)  | 53.62  | 3.94(2.65) | 15.32(6.67)  |
| herpes zoster oticus            | 4  | 5.44(2.03, 14.57)  | 5.44(2.04, 14.49)  | 14.37  | 2.43(1.16) | 5.4(2.37)    |
| whipple's disease               | 4  | 6.68(2.49, 17.9)   | 6.68(2.51, 17.8)   | 19.09  | 2.73(1.45) | 6.61(2.9)    |

|                                       |     |                       |                       |         |            |                  |
|---------------------------------------|-----|-----------------------|-----------------------|---------|------------|------------------|
| herpes simplex<br>meningoencephalitis | 4   | 29.8(10.91,<br>81.39) | 29.8(10.97,<br>80.97) | 105.89  | 4.83(3.53) | 28.39(12.2<br>5) |
| infusion site abscess                 | 3   | 5.85(1.88,<br>18.24)  | 5.85(1.88,<br>18.23)  | 11.94   | 2.54(1.11) | 5.8(2.24)        |
| pseudomonas bronchitis                | 3   | 29.54(9.26,<br>94.25) | 29.54(9.29,<br>93.89) | 78.73   | 4.82(3.36) | 28.16(10.6<br>7) |
| vomiting projectile                   | 13  | 3.17(1.84,<br>5.47)   | 3.17(1.83,<br>5.49)   | 19.23   | 1.66(0.9)  | 3.16(2)          |
| gastrointestinal hypomotility         | 9   | 3.96(2.06,<br>7.63)   | 3.96(2.07,<br>7.56)   | 19.79   | 1.98(1.08) | 3.94(2.28)       |
| oesophageal motility disorder         | 5   | 10.45(4.32,<br>25.31) | 10.45(4.33,<br>25.24) | 41.97   | 3.36(2.2)  | 10.28(4.91<br>)  |
| trichoglossia                         | 5   | 9.08(3.75,<br>21.96)  | 9.08(3.76,<br>21.93)  | 35.39   | 3.16(2)    | 8.95(4.28)       |
| oesophageal achalasia                 | 5   | 5.35(2.22,<br>12.91)  | 5.35(2.21,<br>12.92)  | 17.52   | 2.41(1.25) | 5.31(2.54)       |
| neurogenic bowel                      | 4   | 11.07(4.12,<br>29.76) | 11.07(4.15,<br>29.5)  | 35.94   | 3.44(2.16) | 10.88(4.75<br>)  |
| oral discharge                        | 3   | 5.22(1.67,<br>16.26)  | 5.22(1.67,<br>16.27)  | 10.14   | 2.37(0.95) | 5.18(2)          |
| cardiac arrest                        | 449 | 3.46(3.15,<br>3.8)    | 3.45(3.13,<br>3.81)   | 776.47  | 1.78(1.65) | 3.43(3.18)       |
| cardio-respiratory arrest             | 265 | 3.94(3.49,<br>4.44)   | 3.93(3.49,<br>4.42)   | 575.32  | 1.97(1.79) | 3.91(3.53)       |
| acute coronary syndrome               | 147 | 11.07(9.4,<br>13.04)  | 11.06(9.45,<br>12.94) | 1319.65 | 3.44(3.21) | 10.87(9.48<br>)  |
| sinus tachycardia                     | 77  | 3.46(2.77,<br>4.33)   | 3.46(2.79,<br>4.29)   | 133.99  | 1.79(1.46) | 3.45(2.86)       |
| hypertensive heart disease            | 15  | 4.76(2.86,<br>7.91)   | 4.76(2.86,<br>7.92)   | 44.19   | 2.24(1.53) | 4.73(3.09)       |
| myocardial fibrosis                   | 9   | 6.97(3.61,<br>13.45)  | 6.97(3.58,<br>13.57)  | 45.5    | 2.79(1.89) | 6.9(3.98)        |
| cardiac hypertrophy                   | 7   | 4.07(1.93,<br>8.55)   | 4.07(1.93,<br>8.57)   | 16.08   | 2.02(1.01) | 4.05(2.17)       |
| rhythm idioventricular                | 4   | 7.77(2.9,<br>20.85)   | 7.77(2.92,<br>20.7)   | 23.29   | 2.94(1.67) | 7.68(3.37)       |
| cardiovascular symptom                | 4   | 7.52(2.81,<br>20.17)  | 7.52(2.82,<br>20.04)  | 22.33   | 2.89(1.62) | 7.44(3.26)       |
| foetal heart rate disorder            | 3   | 11.7(3.73,<br>36.69)  | 11.7(3.75,<br>36.47)  | 28.77   | 3.52(2.09) | 11.49(4.41<br>)  |
| self-medication                       | 56  | 8.94(6.86,<br>11.64)  | 8.93(6.92,<br>11.52)  | 388.48  | 3.14(2.76) | 8.81(7.06)       |

|                                        |     |                      |                      |        |            |              |
|----------------------------------------|-----|----------------------|----------------------|--------|------------|--------------|
| detoxification                         | 11  | 19.79(10.85, 36.09)  | 19.79(10.78, 36.33)  | 189.75 | 4.26(3.43) | 19.17(11.59) |
| finger amputation                      | 6   | 5.24(2.35, 11.71)    | 5.24(2.35, 11.7)     | 20.41  | 2.38(1.31) | 5.2(2.66)    |
| euthanasia                             | 5   | 10.72(4.43, 25.97)   | 10.72(4.44, 25.9)    | 43.27  | 3.4(2.23)  | 10.54(5.03)  |
| drug rehabilitation                    | 5   | 22.18(9.08, 54.17)   | 22.18(9, 54.64)      | 97.39  | 4.42(3.24) | 21.4(10.13)  |
| nerve block                            | 4   | 4.67(1.74, 12.48)    | 4.67(1.75, 12.44)    | 11.43  | 2.21(0.94) | 4.64(2.04)   |
| patient restraint                      | 3   | 26.02(8.18, 82.72)   | 26.02(8.19, 82.7)    | 69.07  | 4.64(3.19) | 24.94(9.48)  |
| hypogonadism male                      | 19  | 52.83(33.03, 84.5)   | 52.82(33, 84.55)     | 885.44 | 5.6(4.94)  | 48.5(32.74)  |
| hypogonadism                           | 10  | 6.21(3.33, 11.59)    | 6.21(3.32, 11.63)    | 43.29  | 2.62(1.77) | 6.16(3.66)   |
| secondary adrenocortical insufficiency | 8   | 3.74(1.87, 7.49)     | 3.74(1.88, 7.43)     | 15.95  | 1.9(0.95)  | 3.72(2.08)   |
| carcinoid crisis                       | 6   | 16.44(7.31, 37.02)   | 16.44(7.36, 36.72)   | 84.63  | 4(2.92)    | 16.02(8.12)  |
| secondary hypogonadism                 | 4   | 8.04(3, 21.57)       | 8.04(3.02, 21.42)    | 24.33  | 2.99(1.71) | 7.95(3.48)   |
| androgen deficiency                    | 3   | 5.35(1.72, 16.67)    | 5.35(1.72, 16.67)    | 10.5   | 2.41(0.99) | 5.31(2.05)   |
| pupillary reflex impaired              | 38  | 13.63(9.88, 18.8)    | 13.62(9.95, 18.64)   | 434.2  | 3.74(3.28) | 13.33(10.19) |
| pupil fixed                            | 33  | 11.87(8.41, 16.75)   | 11.86(8.33, 16.88)   | 321.76 | 3.54(3.05) | 11.65(8.73)  |
| lid sulcus deepened                    | 3   | 5.4(1.73, 16.82)     | 5.4(1.73, 16.83)     | 10.65  | 2.42(1)    | 5.36(2.07)   |
| cyanosis                               | 104 | 4.19(3.46, 5.09)     | 4.19(3.44, 5.1)      | 250.91 | 2.06(1.78) | 4.17(3.55)   |
| visceral congestion                    | 10  | 13.24(7.07, 24.77)   | 13.23(7.07, 24.77)   | 110.59 | 3.7(2.83)  | 12.96(7.67)  |
| vasoconstriction                       | 6   | 4.73(2.12, 10.56)    | 4.73(2.12, 10.56)    | 17.51  | 2.23(1.16) | 4.7(2.4)     |
| neonatal hypotension                   | 5   | 8.4(3.47, 20.3)      | 8.4(3.48, 20.29)     | 32.11  | 3.05(1.89) | 8.29(3.96)   |
| chronic spontaneous urticaria          | 10  | 7.52(4.03, 14.03)    | 7.52(4.02, 14.08)    | 55.77  | 2.89(2.04) | 7.43(4.41)   |
| occupational dermatitis                | 3   | 37.89(11.79, 121.84) | 37.89(11.69, 122.82) | 101.16 | 5.16(3.69) | 35.63(13.41) |

|                                           |    |                       |                       |        |            |               |
|-------------------------------------------|----|-----------------------|-----------------------|--------|------------|---------------|
| nephrosclerosis                           | 13 | 6.89(3.99, 11.9)      | 6.89(3.98, 11.93)     | 64.63  | 2.77(2.01) | 6.82(4.31)    |
| bladder dilatation                        | 10 | 5.89(3.16, 10.99)     | 5.89(3.15, 11.03)     | 40.22  | 2.55(1.69) | 5.84(3.47)    |
| urinary bladder rupture                   | 5  | 13.03(5.37, 31.61)    | 13.03(5.39, 31.48)    | 54.3   | 3.67(2.5)  | 12.76(6.08)   |
| bladder neck obstruction                  | 4  | 20.57(7.59, 55.75)    | 20.57(7.57, 55.89)    | 71.92  | 4.31(3.02) | 19.9(8.64)    |
| systemic mastocytosis                     | 7  | 17.46(8.23, 37.03)    | 17.46(8.29, 36.77)    | 105.42 | 4.09(3.07) | 16.98(9.05)   |
| metastases to eye                         | 6  | 19.7(8.73, 44.44)     | 19.7(8.65, 44.87)     | 102.99 | 4.25(3.17) | 19.08(9.66)   |
| carcinoid tumour                          | 6  | 4.88(2.18, 10.89)     | 4.88(2.18, 10.9)      | 18.33  | 2.28(1.2)  | 4.84(2.47)    |
| neuroendocrine tumour of the lung         | 3  | 19.15(6.06, 60.5)     | 19.15(6.02, 60.87)    | 49.97  | 4.22(2.77) | 18.57(7.1)    |
| vascular malformation                     | 6  | 20.75(9.19, 46.85)    | 20.75(9.11, 47.26)    | 108.9  | 4.33(3.24) | 20.07(10.15)  |
| newborn persistent pulmonary hypertension | 4  | 9.68(3.6, 26.01)      | 9.68(3.63, 25.79)     | 30.64  | 3.25(1.98) | 9.54(4.17)    |
| foetal megacystis                         | 4  | 58.1(20.79, 162.4)    | 58.1(20.97, 160.99)   | 204.07 | 5.73(4.39) | 52.91(22.39)  |
| congenital pulmonary hypertension         | 3  | 9.27(2.96, 29.01)     | 9.27(2.97, 28.89)     | 21.79  | 3.19(1.76) | 9.14(3.52)    |
| sphincter of oddi dysfunction             | 26 | 41.74(28.04, 62.15)   | 41.73(28.2, 61.76)    | 964.36 | 5.29(4.72) | 39(27.95)     |
| biliary dilatation                        | 10 | 4.42(2.37, 8.23)      | 4.42(2.36, 8.28)      | 26.22  | 2.13(1.28) | 4.39(2.61)    |
| biliary obstruction                       | 7  | 4.77(2.27, 10.04)     | 4.77(2.26, 10.05)     | 20.71  | 2.25(1.24) | 4.74(2.55)    |
| female reproductive tract disorder        | 4  | 14.44(5.35, 38.93)    | 14.44(5.31, 39.24)    | 48.81  | 3.82(2.54) | 14.11(6.15)   |
| compartment syndrome                      | 14 | 3.41(2.01, 5.76)      | 3.41(2.01, 5.79)      | 23.66  | 1.76(1.03) | 3.39(2.19)    |
| seronegative arthritis                    | 8  | 5.39(2.69, 10.82)     | 5.39(2.66, 10.92)     | 28.36  | 2.42(1.47) | 5.35(2.99)    |
| contrast media allergy                    | 25 | 10.5(7.07, 15.59)     | 10.5(7.09, 15.54)     | 210.96 | 3.37(2.81) | 10.33(7.42)   |
| anaesthetic complication neonatal         | 3  | 348.62(83.31, 1457.9) | 348.61(83.36, 1457.9) | 649.9  | 7.77(6.07) | 218.26(65.89) |
| acidosis                                  | 46 | 3.84(2.87, 5.13)      | 3.84(2.86, 5.15)      | 95.98  | 1.93(1.52) | 3.82(3)       |

# Supplementary Table 2 PTs based on Age Stratification Analysis of Hydromorphone and morphine stulfa

| Hydromorphone                                                       |                                         | hydromorphone <18 |                               |                 |         |            |             |         |         |       |                                   | hydromorphone 18-65 |            |             |             |           |         |                   |           |            |                    | hydromorphone >=65 |         |            |                  |              |            |            |                    |       |           | hydromorphone unknow |             |           |         |         |       |  |  |  |  |
|---------------------------------------------------------------------|-----------------------------------------|-------------------|-------------------------------|-----------------|---------|------------|-------------|---------|---------|-------|-----------------------------------|---------------------|------------|-------------|-------------|-----------|---------|-------------------|-----------|------------|--------------------|--------------------|---------|------------|------------------|--------------|------------|------------|--------------------|-------|-----------|----------------------|-------------|-----------|---------|---------|-------|--|--|--|--|
| soc_english                                                         | pt_english                              | Case              | Repor                         | ROR(95%         | PRR(95% | chisq      | IC(1C025)   | EBGM(EB | p.value | p.adj | Case                              | Repor               | ROR(95%    | PRR(95%     | chisq       | IC(1C025) | EBGM(EB | p.value           | p.adj     | Case       | Repor              | ROR(95%            | PRR(95% | chisq      | IC(1C025)        | EBGM(EB      | p.value    | p.adj      | Case               | Repor | ROR(95%   | PRR(95%              | chisq       | IC(1C025) | EBGM(EB | p.value | p.adj |  |  |  |  |
| eye disorders                                                       | miosis                                  | 4                 | 9.8(3.66, 29.76)              | 3.66            | 31.34   | 3.28(2.01) | 9.72(4.27)  | 0.001   | 0.002   |       |                                   |                     |            |             |             |           |         |                   |           | 24         | 25.81(17.2, 52.74) | 17.0               | 56.17   | 4.66(4.09) | 25.32(18.0)      |              |            |            |                    |       |           |                      |             |           |         |         |       |  |  |  |  |
| respiratory, thoracic and mediastinal disorders                     | acute respiratory failure               | 3                 | 9.57(3.07, 9.54)              | 3.06            | 22.86   | 3.25(1.83) | 9.51(3.68)  | 0.004   | 0.008   |       |                                   |                     |            |             |             |           |         |                   |           |            |                    |                    |         |            |                  |              |            |            |                    |       |           |                      |             |           |         |         |       |  |  |  |  |
| respiratory, thoracic and mediastinal disorders                     | aspiration                              | 3                 | 9.55(3.07, 9.52)              | 3.05            | 22.78   | 3.25(1.82) | 9.48(3.67)  | 0.004   | 0.008   |       |                                   |                     |            |             |             |           |         |                   |           |            |                    |                    |         |            |                  |              |            |            |                    |       |           |                      |             |           |         |         |       |  |  |  |  |
| immune system disorders                                             | acute graft versus host disease in skin | 3                 | 9.41(3.02, 9.38)              | 3.01            | 22.37   | 3.22(1.8)  | 9.34(3.61)  | 0.004   | 0.008   |       |                                   |                     |            |             |             |           |         |                   |           |            |                    |                    |         |            |                  |              |            |            |                    |       |           |                      |             |           |         |         |       |  |  |  |  |
| nervous system disorders                                            | hydrocephalus                           | 3                 | 8.31(2.67, 8.29)              | 2.66            | 19.16   | 3.05(1.63) | 8.26(3.19)  | 0.006   | 0.01    |       |                                   |                     |            |             |             |           |         |                   |           |            |                    |                    |         |            |                  |              |            |            |                    |       |           |                      |             |           |         |         |       |  |  |  |  |
| nervous system disorders                                            | hypertonia                              | 3                 | 8.19(2.63, 8.17)              | 2.62            | 18.82   | 3.03(1.61) | 8.14(3.15)  | 0.006   | 0.011   |       |                                   |                     |            |             |             |           |         |                   |           |            |                    |                    |         |            |                  |              |            |            |                    |       |           |                      |             |           |         |         |       |  |  |  |  |
| neoplasms benign, malignant and unspecified (incl cysts and polyps) | retro-orbital neoplasm                  | 4                 | 778.85(250.775, 1724)         | 2319.53         |         | 9.18(7.74) | 581.63(225) |         | 0       |       |                                   |                     |            |             |             |           |         |                   |           |            |                    |                    |         |            |                  |              |            |            |                    |       |           |                      |             |           |         |         |       |  |  |  |  |
| neoplasms benign, malignant and unspecified (incl cysts and polyps) | metastases to liver                     | 3                 | 76.93(24.3, 76.67)            | 24.1            | 216.89  | 6.21(4.77) | 74.25(28.3) | 0       | 0       |       |                                   |                     |            |             |             |           |         |                   |           |            |                    |                    |         |            |                  |              |            |            |                    |       |           |                      |             |           |         |         |       |  |  |  |  |
| neoplasms benign, malignant and unspecified (incl cysts and polyps) | neuroblastoma recurrent                 | 3                 | 72.93(23.0, 72.67)            | 22.8            | 205.64  | 6.14(4.69) | 70.5(26.91) | 0       | 0       |       |                                   |                     |            |             |             |           |         |                   |           |            |                    |                    |         |            |                  |              |            |            |                    |       |           |                      |             |           |         |         |       |  |  |  |  |
| infections and infestations                                         | pneumonia aspiration                    | 3                 | 7.97(2.56, 7.95)              | 2.55            | 18.16   | 2.99(1.57) | 7.92(3.06)  | 0.007   | 0.011   |       |                                   |                     |            |             |             |           |         |                   |           |            |                    |                    |         |            |                  |              |            |            |                    |       |           |                      |             |           |         |         |       |  |  |  |  |
| neoplasms benign, malignant and unspecified (incl cysts and polyps) | malignant cranial nerve neoplasm        | 4                 | 667.58(215.664, 43217)        | 2060.92         |         | 9.01(7.59) | 517(203.65) |         | 0       |       |                                   |                     |            |             |             |           |         |                   |           |            |                    |                    |         |            |                  |              |            |            |                    |       |           |                      |             |           |         |         |       |  |  |  |  |
| psychiatric disorders                                               | substance abuse                         | 8                 | 63.02(31.1, 62.43)            | 30.8            | 471     | 5.93(4.97) | 60.82(33.7) | 0       | 0       | 186   | 55.02(47.4, 54.44)                | 47.4                | 9335.45    | 5.7(5.49)   | 52.12(46.0) | 0         | 0       | 0                 | 0         | 4          | 36.26(13.4, 36.24) | 13.3               | 133.88  | 5.15(3.86) | 35.42(15.4)      | 0            | 0          | 66         | 13.75(10.7, 13.73) | 10.8  | 760.9     | 3.75(3.4)            | 13.43(10.9) | 0         | 0       |         |       |  |  |  |  |
| psychiatric disorders                                               | drug dependence                         | 33                | 62.49(43.9, 60.14)            | 43.07           | 1870.63 | 5.87(5.37) | 58.61(43.6) | 0       | 0       | 380   | 23.46(21.1, 22.96)                | 20.8                | 7838.78    | 4.49(4.35)  | 22.55(20.6) | 0         | 0       | 0                 | 0         | 29         | 12.3(8.53, 12.25)  | 8.44               | 297.42  | 3.6(3.09)  | 12.16(8.95)      | 0            | 0          | 6483       | 37(35.99, 329.87)  | 29.2  | 173174.42 | 4.83(4.79)           | 28.44(27.7) | 0         | 0       |         |       |  |  |  |  |
| injury, poisoning and procedural complications                      | accidental exposure to product by child | 15                | 6.84(4.1, 1.6)                | 73(4.04, 73.2)  |         | 2.75(2.03) | 6.72(4.38)  | 0       | 0       |       |                                   |                     |            |             |             |           |         |                   |           |            |                    |                    |         |            |                  |              |            |            |                    |       |           |                      |             |           |         |         |       |  |  |  |  |
| injury, poisoning and procedural complications                      | accidental overdose                     | 14                | 6.83(4.02, 6.73)              | 3(9.6, 68.3)    |         | 2.75(2.01) | 6.72(4.31)  | 0       | 0       |       |                                   |                     |            |             |             |           |         |                   |           |            |                    |                    |         |            |                  |              |            |            |                    |       |           |                      |             |           |         |         |       |  |  |  |  |
| nervous system disorders                                            | intracranial pressure increased         | 3                 | 6.71(2.16, 6.69)              | 2(15, 14.48)    |         | 2.74(1.32) | 6.67(2.58)  | 0.011   | 0.017   |       |                                   |                     |            |             |             |           |         |                   |           |            |                    |                    |         |            |                  |              |            |            |                    |       |           |                      |             |           |         |         |       |  |  |  |  |
| general disorders and administration site conditions                | unevaluable event                       | 4                 | 6.63(2.48, 6.61)              | 2(48, 18.99)    |         | 2.72(1.45) | 6.59(2.89)  | 0.003   | 0.007   |       |                                   |                     |            |             |             |           |         |                   |           |            |                    |                    |         |            |                  |              |            |            |                    |       |           |                      |             |           |         |         |       |  |  |  |  |
| injury, poisoning and procedural complications                      | accidental exposure to product          | 9                 | 6.39(3.31, 6.33)              | 3(32, 40.34)    |         | 2.66(1.76) | 6.31(3.64)  | 0       | 0       |       |                                   |                     |            |             |             |           |         |                   |           |            |                    |                    |         |            |                  |              |            |            |                    |       |           |                      |             |           |         |         |       |  |  |  |  |
| psychiatric disorders                                               | learning disability                     | 4                 | 56.98(21.0, 56.72)            | 21.2            | 213.75  | 5.79(4.5)  | 55.39(24.1) | 0       | 0       |       |                                   |                     |            |             |             |           |         |                   |           |            |                    |                    |         |            |                  |              |            |            |                    |       |           |                      |             |           |         |         |       |  |  |  |  |
| general disorders and administration site conditions                | potentiating drug interaction           | 3                 | 50.37(16.0, 50.19)            | 16.1            | 141.59  | 5.62(4.18) | 49.15(18.8) | 0       | 0       |       |                                   |                     |            |             |             |           |         |                   |           |            |                    |                    |         |            |                  |              |            |            |                    |       |           |                      |             |           |         |         |       |  |  |  |  |
| injury, poisoning and procedural complications                      | toxicity to various agents              | 26                | 5.98(4.04, 5.82)              | 4(01, 104.2)    |         | 2.54(1.99) | 5.81(4.19)  | 0       | 0       |       |                                   |                     |            |             |             |           |         |                   |           |            |                    |                    |         |            |                  |              |            |            |                    |       |           |                      |             |           |         |         |       |  |  |  |  |
| congenital, familial and genetic disorders                          | ventricular septal defect               | 4                 | 5.94(2.22, 5.92)              | 2(22, 16.33)    |         | 2.56(1.29) | 5.91(2.59)  | 0.005   | 0.009   |       |                                   |                     |            |             |             |           |         |                   |           |            |                    |                    |         |            |                  |              |            |            |                    |       |           |                      |             |           |         |         |       |  |  |  |  |
| nervous system disorders                                            | altered state of consciousness          | 3                 | 5.7(1.83, 1.5)                | 68(1.82, 11.55) |         | 2.5(1.08)  | 5.67(2.19)  | 0.017   | 0.026   |       |                                   |                     |            |             |             |           |         |                   |           |            |                    |                    |         |            |                  |              |            |            |                    |       |           |                      |             |           |         |         |       |  |  |  |  |
| nervous system disorders                                            | lethargy                                | 9                 | 5.48(2.84, 5.43)              | 2(84, 32.53)    |         | 2.44(1.54) | 5.42(3.13)  | 0       | 0       |       |                                   |                     |            |             |             |           |         |                   |           |            |                    |                    |         |            |                  |              |            |            |                    |       |           |                      |             |           |         |         |       |  |  |  |  |
| respiratory, thoracic and mediastinal disorders                     | hypoxia                                 | 5                 | 5.41(2.25, 5.39)              | 2(23, 17.85)    |         | 2.43(1.27) | 5.38(2.58)  | 0.003   | 0.005   |       |                                   |                     |            |             |             |           |         |                   |           |            |                    |                    |         |            |                  |              |            |            |                    |       |           |                      |             |           |         |         |       |  |  |  |  |
| injury, poisoning and procedural complications                      | sedation complication                   | 3                 | 44.31(14.1, 44.16)            | 14.1            | 124.19  | 5.44(4)    | 43.35(16.6) | 0       | 0       |       |                                   |                     |            |             |             |           |         |                   |           |            |                    |                    |         |            |                  |              |            |            |                    |       |           |                      |             |           |         |         |       |  |  |  |  |
| cardiac disorders                                                   | bradycardia                             | 6                 | 4.21(1.88, 9.4)               | 17(1.87, 14.47) |         | 2.06(0.98) | 4.17(2.13)  | 0.004   | 0.007   |       |                                   |                     |            |             |             |           |         |                   |           |            |                    |                    |         |            |                  |              |            |            |                    |       |           |                      |             |           |         |         |       |  |  |  |  |
| nervous system disorders                                            | loss of consciousness                   | 7                 | 4.05(1.93, 4.03)              | 1(91, 15.95)    |         | 2.01(1)    | 4.02(2.16)  | 0.002   | 0.004   |       |                                   |                     |            |             |             |           |         |                   |           |            |                    |                    |         |            |                  |              |            |            |                    |       |           |                      |             |           |         |         |       |  |  |  |  |
| nervous system disorders                                            | brain herniation                        | 6                 | 39.92(17.7, 39.64)            | 17(7, 222.24)   |         | 5.29(4.2)  | 38.99(19.8) | 0       | 0       |       |                                   |                     |            |             |             |           |         |                   |           |            |                    |                    |         |            |                  |              |            |            |                    |       |           |                      |             |           |         |         |       |  |  |  |  |
| nervous system disorders                                            | hyperaesthesia                          | 4                 | 36.51(13.56, 36.34)           | 13(6, 135.36)   |         | 5.16(3.88) | 35.79(15.6) | 0       | 0       | 53    | 15.9(12.12, 15.85)                | 12(0, 727.99)       | 3.97(3.58) | 15.66(12.4) | 0           | 0         | 10      | 11.6(6.22, 11.59) | 6(19, 96) | 3.52(2.67) | 11.51(6.83)        | 0                  | 0       | 22         | 5.99(3.94, 5.99) | 3(97, 90.48) | 2.57(1.98) | 5.94(4.18) | 0                  | 0     |           |                      |             |           |         |         |       |  |  |  |  |
| nervous system disorders                                            | postoperative ileus                     | 6                 | 351.31(143.348, 83147)        | 1809.59         |         | 8.25(7.1)  | 303.46(147) | 0       | 0       | 6     | 40.28(17.8, 40.27)                | 18(0, 222.32)       | 5.29(4.2)  | 39(19.74)   | 0           | 0         |         |                   |           |            |                    |                    |         |            |                  |              |            |            |                    |       |           |                      |             |           |         |         |       |  |  |  |  |
| cardiac disorders                                                   | dilatation ventricular                  | 3                 | 35.9(11.46, 35.78)            | 11(4, 99.89)    |         | 5.14(3.71) | 35.25(13.5) | 0       | 0       |       |                                   |                     |            |             |             |           |         |                   |           |            |                    |                    |         |            |                  |              |            |            |                    |       |           |                      |             |           |         |         |       |  |  |  |  |
| psychiatric disorders                                               | substance dependence                    | 3                 | 333.39(99.332, 22(98, 866.83) |                 |         | 8.18(6.66) | 290.4(105)  | 0       | 0       | 53    | 241.02(175.240, 28(175, 10524.25) |                     | 7.65(7.23) | 290.4(156)  | 0           | 0         |         |                   |           |            |                    |                    |         |            |                  |              |            |            |                    |       |           |                      |             |           |         |         |       |  |  |  |  |
| injury, poisoning and procedural complications                      | overdose                                | 22                | 3.77(2.47, 3.69)              | 2(44, 43.46)    |         | 1.88(1.29) | 3.69(2.59)  | 0       | 0       |       |                                   |                     |            |             |             |           |         |                   |           |            |                    |                    |         |            |                  |              |            |            |                    |       |           |                      |             |           |         |         |       |  |  |  |  |
| general disorders and administration site conditions                | drug interaction                        | 9                 | 3.63(1.88, 3.61)              | 1(89, 6.16)     | 91      | 1.85(0.95) | 3.59(2.07)  | 0.001   | 0.002   |       |                                   |                     |            |             |             |           |         |                   |           |            |                    |                    |         |            |                  |              |            |            |                    |       |           |                      |             |           |         |         |       |  |  |  |  |
| respiratory, thoracic and mediastinal disorders                     | hypopnea                                | 3                 | 29.29(9.36, 29.19)            | 9(37, 80.67)    |         | 4.85(3.42) | 28.84(11.1) | 0       | 0       |       |                                   |                     |            |             |             |           |         |                   |           |            |                    |                    |         |            |                  |              |            |            |                    |       |           |                      |             |           |         |         |       |  |  |  |  |
| neoplasms benign, malignant and unspecified (incl cysts and polyps) | metastases to spine                     | 4                 | 267.03(94.265, 77(94, 946.91) |                 |         | 7.9(6.55)  | 238.62(100) | 0       | 0       |       |                                   |                     |            |             |             |           |         |                   |           |            |                    |                    |         |            |                  |              |            |            |                    |       |           |                      |             |           |         |         |       |  |  |  |  |
| surgical and medical procedures                                     | therapy change                          | 3                 | 25.18(8.06, 25.1)             | 8(05, 68.67)    |         | 4.63(3.21) | 24.84(9.57) | 0       | 0.001   |       |                                   |                     |            |             |             |           |         |                   |           |            |                    |                    |         |            |                  |              |            |            |                    |       |           |                      |             |           |         |         |       |  |  |  |  |
| psychiatric disorders                                               | bruxism                                 | 3                 | 24.31(7.78, 24.22)            | 7(77, 66.12)    |         | 4.58(3.16) | 23.98(9.24) | 0       | 0.001   |       |                                   |                     |            |             |             |           |         |                   |           |            |                    |                    |         |            |                  |              |            |            |                    |       |           |                      |             |           |         |         |       |  |  |  |  |
| investigations                                                      | pulse absent                            | 3                 | 22.08(7.07, 22.01)            | 7(06, 59.61)    |         | 4.45(3.02) | 21.81(8.41) | 0       | 0.001   |       |                                   |                     |            |             |             |           |         |                   |           |            |                    |                    |         |            |                  |              |            |            |                    |       |           |                      |             |           |         |         |       |  |  |  |  |
| psychiatric disorders                                               | euphoric mood                           | 3                 | 21.41(6.85, 21.33)            | 6(84, 57.63)    |         | 4.4(2.98)  | 21.15(8.16) | 0       | 0.001   | 46    | 13.07(9.77, 13.04)                | 9(72, 505.98)       | 3.69(3.28) | 12.91(10.1) | 0           | 0         |         |                   |           |            |                    |                    |         |            |                  |              |            |            |                    |       |           |                      |             |           |         |         |       |  |  |  |  |
| respiratory, thoracic and mediastinal disorders                     | infantile apnoea                        | 3                 | 20.77(6.65, 20.7)             | 6(64, 55.76)    |         | 4.36(2.93) | 20.53(7.92) | 0       | 0.001   |       |                                   |                     |            |             |             |           |         |                   |           |            |                    |                    |         |            |                  |              |            |            |                    |       |           |                      |             |           |         |         |       |  |  |  |  |



|                                                                     |                                         |    |                               |            |                  |       |    |                               |            |                  |       |       |  |  |  |  |  |  |  |  |
|---------------------------------------------------------------------|-----------------------------------------|----|-------------------------------|------------|------------------|-------|----|-------------------------------|------------|------------------|-------|-------|--|--|--|--|--|--|--|--|
| surgical and medical procedures                                     | rest regimen                            | 4  | 436.97(135.436.87(140.1275.62 | 8.32(6.88) | 320.64(1230      | 0     |    |                               |            |                  |       |       |  |  |  |  |  |  |  |  |
| surgical and medical procedures                                     | fluid replacement                       | 4  | 45.35(16.7 45.34(16.6 167.12  | 5.45(4.16) | 43.72(18.90      | 0     |    |                               |            |                  |       |       |  |  |  |  |  |  |  |  |
| surgical and medical procedures                                     | life support                            | 4  | 22.15(8.24 22.15(8.31 79.3    | 4.44(3.16) | 21.76(9.51 0     | 0     |    |                               |            |                  |       |       |  |  |  |  |  |  |  |  |
| surgical and medical procedures                                     | drug therapy                            | 4  | 72.96(26.7 72.92(26.8 270.71  | 6.12(4.82) | 69.62(30.00      | 0     | 3  | 8.88(2.84, 8.88(2.85, 20.65   | 3.13(1.7)  | 8.76(3.37)       | 0.005 | 0.01  |  |  |  |  |  |  |  |  |
| surgical and medical procedures                                     | therapeutic embolisation                | 4  | 63.08(23.2 63.05(23.2 234.49  | 5.92(4.62) | 60.57(26.20      | 0     |    |                               |            |                  |       |       |  |  |  |  |  |  |  |  |
| surgical and medical procedures                                     | analgesic therapy                       | 4  | 60.56(22.2 60.53(22.2 225.17  | 5.86(4.57) | 58.24(25.20      | 0     |    |                               |            |                  |       |       |  |  |  |  |  |  |  |  |
| surgical and medical procedures                                     | sleep disorder therapy                  | 3  | 58.98(18.6 58.96(18.5 164.51  | 5.83(4.38) | 56.78(21.60      | 0     |    |                               |            |                  |       |       |  |  |  |  |  |  |  |  |
| surgical and medical procedures                                     | oxygen therapy                          | 11 | 36.96(20.3 36.91(20.5 375.14  | 5.17(4.34) | 36.05(21.80      | 0     |    |                               |            |                  |       |       |  |  |  |  |  |  |  |  |
| surgical and medical procedures                                     | intensive care                          | 3  | 18.54(5.94 18.53(5.95 49.15   | 4.2(2.77)  | 18.32(7.06 0.001 | 0.002 |    |                               |            |                  |       |       |  |  |  |  |  |  |  |  |
| surgical and medical procedures                                     | eye operation                           | 9  | 11.43(5.93 11.42(5.98 84.9    | 3.5(2.6)   | 11.34(6.55 0     | 0     |    |                               |            |                  |       |       |  |  |  |  |  |  |  |  |
| surgical and medical procedures                                     | palliative care                         | 3  | 9.38(3.01, 9.38(3.01, 22.32   | 3.22(1.8)  | 9.33(3.61) 0.004 | 0.013 |    |                               |            |                  |       |       |  |  |  |  |  |  |  |  |
| surgical and medical procedures                                     | palliative sedation                     | 3  |                               |            |                  |       | 3  | 192.35(52.192.34(51.428.27    | 7.17(5.56) | 144.5(48.40      | 0     |       |  |  |  |  |  |  |  |  |
| surgical and medical procedures                                     | drug detoxification                     | 5  |                               |            |                  |       | 5  | 7.78(3.22, 7.78(3.22, 29.13   | 2.94(1.78) | 7.69(3.67)       | 0.001 | 0.001 |  |  |  |  |  |  |  |  |
| gastrointestinal disorders                                          | narcoic bowel syndrome                  | 4  | 53.41(19.6 53.39(19.6 196.9   | 5.68(4.38) | 51.17(22.10      | 0     |    |                               |            |                  |       |       |  |  |  |  |  |  |  |  |
| gastrointestinal disorders                                          | abdominal compartment syndrome          | 6  | 26.22(11.6 26.21(11.7 142.4   | 4.68(3.6)  | 25.67(13.00      | 0     |    |                               |            |                  |       |       |  |  |  |  |  |  |  |  |
| gastrointestinal disorders                                          | intestinal pseudo-obstruction           | 5  | 19.83(8.19 19.82(8.2, 87.93   | 4.29(3.12) | 19.52(9.320      | 0     |    |                               |            |                  |       |       |  |  |  |  |  |  |  |  |
| gastrointestinal disorders                                          | gastrointestinal tract irritation       | 4  | 13.46(5.02 13.46(5.05 45.63   | 3.74(2.46) | 13.32(5.840      | 0.001 | 3  | 19.32(6.19 19.32(6.2, 51.45   | 4.25(2.83) | 19.09(7.36 0.001 | 0.002 |       |  |  |  |  |  |  |  |  |
| gastrointestinal disorders                                          | appendicitis                            | 10 |                               |            |                  |       | 10 | 67.04(35.5 66.96(35.7 622.18  | 6(5.13)    | 64.16(37.70      | 0     |       |  |  |  |  |  |  |  |  |
| gastrointestinal disorders                                          | faecal vomiting                         | 3  |                               |            |                  |       | 3  | 24.95(7.97 24.94(8, 7767.83   | 4.62(3.19) | 24.55(9.450      | 0.001 |       |  |  |  |  |  |  |  |  |
| gastrointestinal disorders                                          | oesophageal obstruction                 | 3  |                               |            |                  |       | 3  | 18.31(5.86 18.3(5.87, 48.49   | 4.18(2.75) | 18.1(6.98)       | 0.001 | 0.002 |  |  |  |  |  |  |  |  |
| gastrointestinal disorders                                          | subileus                                | 7  |                               |            |                  |       | 7  | 15.66(7.43 15.65(7.43 94.99   | 3.95(2.95) | 15.5(8.31) 0     | 0     |       |  |  |  |  |  |  |  |  |
| gastrointestinal disorders                                          | proctitis                               | 5  |                               |            |                  |       | 5  | 12.87(5.34 12.87(5.33 54.27   | 3.67(2.51) | 12.77(6.110      | 0     |       |  |  |  |  |  |  |  |  |
| gastrointestinal disorders                                          | faecaloma                               | 9  |                               |            |                  |       | 9  | 7.3(3.79, 1.7.29(3.82, 48.66  | 2.86(1.96) | 7.26(4.2) 0      | 0     |       |  |  |  |  |  |  |  |  |
| congenital, familial and genetic disorders                          | hypermobility syndrome                  | 4  | 39.72(14.6 39.72(14.6 146.13  | 5.27(3.98) | 38.48(16.70      | 0     |    |                               |            |                  |       |       |  |  |  |  |  |  |  |  |
| congenital, familial and genetic disorders                          | congenital hearing disorder             | 4  |                               |            |                  |       | 4  | 23.8(8.75, 23.79(8.76 83.89   | 4.52(3.22) | 22.89(9.910      | 0     |       |  |  |  |  |  |  |  |  |
| congenital, familial and genetic disorders                          | congenital megaureter                   | 3  |                               |            |                  |       | 3  | 22.19(7.01 22.19(6.98 58.46   | 4.42(2.97) | 21.41(8.160      | 0.001 |       |  |  |  |  |  |  |  |  |
| congenital, familial and genetic disorders                          | kidney duplex                           | 3  |                               |            |                  |       | 3  | 14.31(4.55 14.31(4.59 36.23   | 3.81(2.37) | 13.98(5.36 0.001 | 0.003 |       |  |  |  |  |  |  |  |  |
| congenital, familial and genetic disorders                          | spina bifida                            | 23 |                               |            |                  |       | 23 | 7.58(5.03, 7.58(5.02, 129.67  | 2.91(2.32) | 7.49(5.31) 0     | 0     |       |  |  |  |  |  |  |  |  |
| congenital, familial and genetic disorders                          | congenital anomaly                      | 58 |                               |            |                  |       | 58 | 5.47(4.22, 5.46(4.23, 209.66  | 2.44(2.07) | 5.42(4.37) 0     | 0     |       |  |  |  |  |  |  |  |  |
| congenital, familial and genetic disorders                          | hydrocele                               | 4  |                               |            |                  |       | 4  | 4.78(1.79, 4.78(1.79, 11.85   | 2.25(0.98) | 4.75(2.08) 0.011 | 0.02  |       |  |  |  |  |  |  |  |  |
| congenital, familial and genetic disorders                          | multiple congenital abnormalities       | 9  |                               |            |                  |       | 9  | 4.29(2.23, 4.29(2.25, 22.53   | 2.09(1.19) | 4.26(2.46) 0     | 0.001 |       |  |  |  |  |  |  |  |  |
| musculoskeletal and connective tissue disorders                     | rib deformity                           | 3  | 42.91(13.5 42.91(13.5 118.56  | 5.37(3.93) | 41.46(15.80      | 0     |    |                               |            |                  |       |       |  |  |  |  |  |  |  |  |
| musculoskeletal and connective tissue disorders                     | dupuytren's contracture                 | 5  | 23.02(9.5, 23.02(9.53 103.31  | 4.5(3.33)  | 22.6(10.780      | 0     |    |                               |            |                  |       |       |  |  |  |  |  |  |  |  |
| musculoskeletal and connective tissue disorders                     | intervertebral disc compression         | 4  | 14.22(5.31 14.22(5.34 48.58   | 3.81(2.54) | 14.06(6.160      | 0.001 |    |                               |            |                  |       |       |  |  |  |  |  |  |  |  |
| musculoskeletal and connective tissue disorders                     | joint destruction                       | 3  |                               |            |                  |       | 3  | 21.73(6.95 21.72(6.97 58.46   | 4.42(2.99) | 21.43(8.260      | 0.002 |       |  |  |  |  |  |  |  |  |
| musculoskeletal and connective tissue disorders                     | limb mass                               | 6  |                               |            |                  |       | 6  | 20.42(9.12 20.4(9.13, 109.24  | 4.33(3.25) | 20.14(10.20      | 0     |       |  |  |  |  |  |  |  |  |
| musculoskeletal and connective tissue disorders                     | intervertebral disc disorder            | 4  |                               |            |                  |       | 4  | 7.59(2.84, 7.58(2.84, 22.75   | 2.92(1.65) | 7.55(3.32) 0.002 | 0.007 |       |  |  |  |  |  |  |  |  |
| musculoskeletal and connective tissue disorders                     | synovitis                               | 10 |                               |            |                  |       | 10 | 7.33(3.94, 7.32(3.91, 54.32   | 2.87(2.01) | 7.29(4.33) 0     | 0     |       |  |  |  |  |  |  |  |  |
| musculoskeletal and connective tissue disorders                     | ankylosing spondylitis                  | 3  |                               |            |                  |       | 3  | 7.04(2.26, 7.04(2.26, 15.47   | 2.81(1.39) | 7.01(2.71) 0.009 | 0.025 |       |  |  |  |  |  |  |  |  |
| musculoskeletal and connective tissue disorders                     | costochondritis                         | 11 |                               |            |                  |       | 11 | 13.89(7.64 13.89(7.57 128.48  | 3.76(2.94) | 13.59(8.240      | 0     |       |  |  |  |  |  |  |  |  |
| neoplasms benign, malignant and unspecified (incl cysts and polyps) | brain stem glioma                       | 3  | 180.24(53. 180.21(53.464.9    | 7.29(5.77) | 156.83(56.0      | 0     |    |                               |            |                  |       |       |  |  |  |  |  |  |  |  |
| neoplasms benign, malignant and unspecified (incl cysts and polyps) | metastatic malignant melanoma           | 7  | 10.6(5.03, 10.59(5.03 60.27   | 3.39(2.39) | 10.51(5.640      | 0     |    |                               |            |                  |       |       |  |  |  |  |  |  |  |  |
| neoplasms benign, malignant and unspecified (incl cysts and polyps) | malignant peritoneal neoplasm           | 3  |                               |            |                  |       | 3  | 27.69(8.84 27.68(8.88 75.76   | 4.77(3.33) | 27.2(10.460      | 0.001 |       |  |  |  |  |  |  |  |  |
| metabolism and nutrition disorders                                  | hyperphosphataemia                      | 4  |                               |            |                  |       | 4  | 11.23(4.2, 11.23(4.21 37      | 3.48(2.21) | 11.15(4.9) 0.001 | 0.002 |       |  |  |  |  |  |  |  |  |
| metabolism and nutrition disorders                                  | iron deficiency                         | 7  |                               |            |                  |       | 7  | 10.48(4.98 10.47(4.97 59.53   | 3.38(2.37) | 10.4(5.58) 0     | 0     |       |  |  |  |  |  |  |  |  |
| metabolism and nutrition disorders                                  | protein deficiency                      | 4  |                               |            |                  |       | 4  | 24.82(9.12 24.82(9.13 87.66   | 4.58(3.28) | 23.84(10.30      | 0     |       |  |  |  |  |  |  |  |  |
| metabolism and nutrition disorders                                  | starvation                              | 3  |                               |            |                  |       | 3  | 7.18(2.3, 7.18(2.3, 2.15.77   | 2.83(1.4)  | 7.11(2.74) 0.009 | 0.017 |       |  |  |  |  |  |  |  |  |
| eye disorders                                                       | hypoesthesia eye                        | 4  | 19.15(7.13 19.15(7.19 67.71   | 4.24(2.96) | 18.86(8.250      | 0     |    |                               |            |                  |       |       |  |  |  |  |  |  |  |  |
| eye disorders                                                       | pupil fixed                             | 4  |                               |            |                  |       | 4  | 23.47(8.74 23.46(8.8, 84.7    | 4.53(3.25) | 23.12(10.10      | 0     |       |  |  |  |  |  |  |  |  |
| eye disorders                                                       | eye movement disorder                   | 6  |                               |            |                  |       | 6  | 8.96(4.01, 8.95(4.01, 42.15   | 3.15(2.08) | 8.91(4.55) 0     | 0     |       |  |  |  |  |  |  |  |  |
| eye disorders                                                       | vision abnormal neonatal                | 35 |                               |            |                  |       | 35 | 55.39(39.1 55.33(38.8 1703.83 | 5.66(5.17) | 50.58(37.80      | 0     |       |  |  |  |  |  |  |  |  |
| eye disorders                                                       | orbital oedema                          | 3  |                               |            |                  |       | 3  | 13.85(4.41 13.85(4.44 34.92   | 3.76(2.32) | 13.55(5.2) 0.002 | 0.003 |       |  |  |  |  |  |  |  |  |
| reproductive system and breast disorders                            | adnexal torsion                         | 3  | 23.72(7.56 23.71(7.61 64      | 4.54(3.11) | 23.27(8.940      | 0.001 |    |                               |            |                  |       |       |  |  |  |  |  |  |  |  |
| reproductive system and breast disorders                            | ovarian mass                            | 3  | 10.33(3.31 10.33(3.31 25.06   | 3.36(1.94) | 10.25(3.96 0.003 | 0.011 |    |                               |            |                  |       |       |  |  |  |  |  |  |  |  |
| reproductive system and breast disorders                            | vaginal flatulence                      | 5  |                               |            |                  |       | 5  | 45.88(18.8 45.85(18.9 212.93  | 5.48(4.3)  | 44.53(21.10      | 0     |       |  |  |  |  |  |  |  |  |
| reproductive system and breast disorders                            | female genital tract fistula            | 5  |                               |            |                  |       | 5  | 19.77(8.18 19.75(8.18 87.88   | 4.29(3.12) | 19.51(9.320      | 0     |       |  |  |  |  |  |  |  |  |
| reproductive system and breast disorders                            | vaginal discharge                       | 5  |                               |            |                  |       | 5  | 9.37(3.89, 9.36(3.87, 37.13   | 3.22(2.06) | 9.31(4.46) 0     | 0.001 |       |  |  |  |  |  |  |  |  |
| skin and subcutaneous tissue disorders                              | adiposis dolorosa                       | 5  | 273.12(102.273.04(102.1104.26 | 7.8(6.53)  | 222.66(98.0      | 0     |    |                               |            |                  |       |       |  |  |  |  |  |  |  |  |
| skin and subcutaneous tissue disorders                              | needle track marks                      | 4  | 36.97(13.6 36.97(13.6 135.79  | 5.17(3.88) | 35.89(15.60      | 0     |    |                               |            |                  |       |       |  |  |  |  |  |  |  |  |
| skin and subcutaneous tissue disorders                              | generalised bullous fixed drug eruption | 4  | 36.69(13.5 36.68(13.5 134.73  | 5.15(3.87) | 35.63(15.50      | 0     |    |                               |            |                  |       |       |  |  |  |  |  |  |  |  |
| skin and subcutaneous tissue disorders                              | urticaria thermal                       | 4  |                               |            |                  |       | 4  | 232.92(81. 232.8(80.7 800.12  | 7.66(6.29) | 201.89(83.0      | 0     |       |  |  |  |  |  |  |  |  |
| immune system disorders                                             | secondary amyloidosis                   | 3  | 48.71(15.3 48.7(15.32 134.72  | 5.55(4.1)  | 46.85(17.80      | 0     |    |                               |            |                  |       |       |  |  |  |  |  |  |  |  |
| immune system disorders                                             | reaction to excipient                   | 7  | 15.41(7.31 15.4(7.31, 93.08   | 3.93(2.92) | 15.22(8.160      | 0     |    |                               |            |                  |       |       |  |  |  |  |  |  |  |  |
| immune system disorders                                             | anaphylactoid reaction                  | 4  |                               |            |                  |       | 4  | 8.03(3.01, 8.03(3.01, 24.48   | 3(1.73)    | 7.99(3.51) 0.002 | 0.006 |       |  |  |  |  |  |  |  |  |
| vascular disorders                                                  | foreign body embolism                   | 7  | 764.83(296.764.52(298.3261.89 | 8.87(7.68) | 467.59(2110      | 0     |    |                               |            |                  |       |       |  |  |  |  |  |  |  |  |
| vascular disorders                                                  | arterial insufficiency                  | 3  | 97.43(30.0 97.41(30.0 264.79  | 6.49(5.01) | 90.18(33.60      | 0     |    |                               |            |                  |       |       |  |  |  |  |  |  |  |  |
| vascular disorders                                                  | vein collapse                           | 7  | 37.06(17.4 37.05(17.5 238.18  | 5.17(4.15) | 35.97(19.10      | 0     |    |                               |            |                  |       |       |  |  |  |  |  |  |  |  |
| renal and urinary disorders                                         | urinary tract discomfort                | 4  | 41.8(15.42 41.79(15.3 153.89  | 5.34(4.05) | 40.42(17.50      |       |    |                               |            |                  |       |       |  |  |  |  |  |  |  |  |













|                                                      |                                           |      |                                 |                              |       |      |                                |                              |       |  |  |  |
|------------------------------------------------------|-------------------------------------------|------|---------------------------------|------------------------------|-------|------|--------------------------------|------------------------------|-------|--|--|--|
| general disorders and administration site conditions | feeling of relaxation                     | 5    | 14(5.79, 3: 13.99(5.79 59.47    | 3.79(2.62) 13.81(6.6) 0      | 0     |      |                                |                              |       |  |  |  |
| general disorders and administration site conditions | temperature regulation disorder           | 14   | 12.28(7.25 12.28(7.23 143.19    | 3.6(2.87) 12.13(7.81) 0      | 0     |      |                                |                              |       |  |  |  |
| general disorders and administration site conditions | infusion site mass                        |      |                                 |                              |       | 3    | 9.75(3.12, 9.75(3.13, 23.24    | 3.27(1.84) 9.63(3.71) 0.004  | 0.01  |  |  |  |
| general disorders and administration site conditions | pain                                      |      |                                 |                              |       | 1927 | 8.96(8.55, 8.36(8.04, 12447.87 | 3.05(2.98) 8.27(7.95) 0      | 0     |  |  |  |
| general disorders and administration site conditions | breakthrough pain                         |      |                                 |                              |       | 8    | 8.3(4.13, 18.3(4.1, 1650.76    | 3.04(2.09) 8.21(4.58) 0      | 0     |  |  |  |
| psychiatric disorders                                | substance dependence                      | 43   | 222.9(159. 222.59(159 7704.58   | 7.5(7.03) 180.98(137.0       | 0     | 25   | 57.2(38.05 57.14(37.8 1276.07  | 5.73(5.15) 52.95(37.60       | 0     |  |  |  |
| psychiatric disorders                                | learning disability                       | 136  | 71.2(59.8, 70.9(59.43 8729.72   | 6.05(5.8) 66.1(57.12) 0      | 0     | 200  | 51.13(44.250.74(44.29101.24    | 5.57(5.36) 47.41(42.00       | 0     |  |  |  |
| psychiatric disorders                                | self esteem inflated                      | 3    | 58.96(18.3 58.95(18.5 161.04    | 5.8(4.33) 55.61(20.90) 0     | 0     | 4    | 43.61(15.843.6(15.73 156.85    | 5.36(4.05) 41.13(17.60       | 0     |  |  |  |
| psychiatric disorders                                | drug dependence                           | 3026 | 55.81(53.7 50.49(48.5 139768.08 | 5.59(5.53) 48.03(46.50) 0    | 0     | 3813 | 39.11(37.733.41(32.1 115030.54 | 5(4.95) 31.95(31.00          | 0     |  |  |  |
| psychiatric disorders                                | substance abuse                           | 104  | 39.52(32.4 39.39(32.3 3738.83   | 5.24(4.96) 37.88(32.10) 0    | 0     | 157  | 27.19(23.1 27.03(23.1 3792.25  | 4.7(4.47) 26.08(22.80        | 0     |  |  |  |
| psychiatric disorders                                | emotional distress                        | 1626 | 30.9(29.37 29.34(28.2 43269     | 4.83(4.76) 28.5(27.32) 0     | 0     | 1779 | 27.02(25.725.2(24.23 40045.32  | 4.61(4.54) 24.37(23.30       | 0     |  |  |  |
| psychiatric disorders                                | self esteem decreased                     | 38   | 31.28(22.6 31.25(22.8 1077.61   | 4.92(4.46) 30.29(23.10) 0    | 0     | 30   | 21.03(14.6 21(14.47, 1555.13   | 4.35(3.84) 20.43(15.00       | 0     |  |  |  |
| psychiatric disorders                                | substance use disorder                    | 12   | 24.49(13.8 24.48(13.8 263.54    | 4.58(3.78) 23.9(14.79) 0     | 0     | 26   | 17.85(12.0 17.83(12.0 403.01   | 4.12(3.57) 17.42(12.50       | 0     |  |  |  |
| psychiatric disorders                                | somatic symptom disorder                  |      |                                 |                              |       | 4    | 10.42(3.88 10.42(3.91 33.57    | 3.36(2.09) 10.28(4.5) 0.001  | 0.002 |  |  |  |
| psychiatric disorders                                | post-traumatic stress disorder            |      |                                 |                              |       | 28   | 9.45(6.51, 9.44(6.5, 1208.49   | 3.22(2.69) 9.33(6.83) 0      | 0     |  |  |  |
| psychiatric disorders                                | suicidal behaviour                        |      |                                 |                              |       | 18   | 8.78(5.52, 8.78(5.49, 122.54   | 3.12(2.46) 8.68(5.88) 0      | 0     |  |  |  |
| psychiatric disorders                                | euphoric mood                             |      |                                 |                              |       | 44   | 8.45(6.27, 8.44(6.29, 285.02   | 3.06(2.64) 8.35(6.51) 0      | 0     |  |  |  |
| psychiatric disorders                                | sexually inappropriate behaviour          |      |                                 |                              |       | 3    | 7.67(2.46, 7.67(2.46, 17.23    | 2.93(1.5) 7.6(2.93) 0.008    | 0.017 |  |  |  |
| psychiatric disorders                                | drug abuse                                |      |                                 |                              |       | 373  | 6.91(6.24, 6.83(6.19, 1841.37  | 2.76(2.61) 6.77(6.21) 0      | 0     |  |  |  |
| psychiatric disorders                                | mental disorder                           |      |                                 |                              |       | 137  | 6.75(5.7, 7.6.72(5.63, 661.41  | 2.74(2.49) 6.67(5.79) 0      | 0     |  |  |  |
| psychiatric disorders                                | alcohol abuse                             |      |                                 |                              |       | 13   | 6.18(3.58, 6.18(3.57, 55.93    | 2.62(1.86) 6.13(3.88) 0      | 0     |  |  |  |
| nervous system disorders                             | judgement impaired                        | 13   | 18.97(10.9 18.97(10.9 216.96    | 4.22(3.45) 18.62(11.70) 0    | 0     | 6    | 6.66(2.98, 6.66(2.98, 28.61    | 2.72(1.65) 6.61(3.37) 0      | 0.001 |  |  |  |
| nervous system disorders                             | unresponsive to stimuli                   | 139  | 11.89(10.0 11.84(9.93 1362.79   | 3.55(3.31) 11.7(10.17) 0     | 0     | 98   | 6.91(5.66, 6.88(5.66, 488.38   | 2.77(2.49) 6.83(5.78) 0      | 0     |  |  |  |
| nervous system disorders                             | reversible ischaemic neurological deficit | 3    | 62.8(19.53 62.79(19.3 171.26    | 5.88(4.41) 59.01(22.20) 0    | 0     |      |                                |                              |       |  |  |  |
| nervous system disorders                             | pseudostroke                              | 4    | 40.55(14.9 40.54(14.9 148.03    | 5.28(3.99) 38.94(16.80) 0    | 0     |      |                                |                              |       |  |  |  |
| nervous system disorders                             | toxic leukoencephalopathy                 | 7    | 25.25(11.9 25.24(11.9 158.82    | 4.62(3.61) 24.62(13.10) 0    | 0     |      |                                |                              |       |  |  |  |
| nervous system disorders                             | hypertensive encephalopathy               | 5    | 16.16(6.68 16.16(6.69 69.91     | 3.99(2.83) 15.9(7.59) 0      | 0     |      |                                |                              |       |  |  |  |
| nervous system disorders                             | cholinergic syndrome                      | 3    | 11.84(3.79 11.84(3.8, 29.41     | 3.55(2.12) 11.71(4.52) 0.002 | 0.007 |      |                                |                              |       |  |  |  |
| nervous system disorders                             | hyporesponsive to stimuli                 | 5    | 10.18(4.22 10.18(4.21 40.95     | 3.33(2.17) 10.08(4.82) 0     | 0.001 |      |                                |                              |       |  |  |  |
| nervous system disorders                             | chanter syndrome                          |      |                                 |                              |       | 4    | 123.24(42. 123.22(42. 413.09   | 6.72(5.34) 105.12(43.0       | 0     |  |  |  |
| nervous system disorders                             | central pain syndrome                     |      |                                 |                              |       | 3    | 33.74(10.6 33.74(10.6 90.98    | 5.01(3.56) 32.25(12.20       | 0     |  |  |  |
| nervous system disorders                             | hyperaesthesia                            |      |                                 |                              |       | 53   | 15.01(11.4 14.99(11.3 677.52   | 3.88(3.49) 14.7(11.7) 0      | 0     |  |  |  |
| nervous system disorders                             | arachnoiditis                             |      |                                 |                              |       | 4    | 12.27(4.57 12.27(4.61 40.7     | 3.59(2.32) 12.08(5.28) 0     | 0.001 |  |  |  |
| nervous system disorders                             | psychomotor skills impaired               |      |                                 |                              |       | 15   | 9.21(5.54, 9.21(5.53, 108.37   | 3.19(2.47) 9.1(5.94) 0       | 0     |  |  |  |
| nervous system disorders                             | allodynia                                 |      |                                 |                              |       | 3    | 7.87(2.52, 7.87(2.53, 17.8     | 2.96(1.54) 7.8(3.01) 0.007   | 0.016 |  |  |  |
| nervous system disorders                             | sleep deficit                             |      |                                 |                              |       | 6    | 6.91(3.09, 6.91(3.09, 30.05    | 2.78(1.7) 6.86(3.5) 0        | 0.001 |  |  |  |
| nervous system disorders                             | seizure like phenomena                    |      |                                 |                              |       | 5    | 6.57(2.72, 6.57(2.72, 23.41    | 2.71(1.54) 6.52(3.12) 0.001  | 0.003 |  |  |  |
| surgical and medical procedures                      | fluid replacement                         | 3    | 16.6(5.3, 5 16.6(5.33, 43.24    | 4.03(2.6) 16.34(6.29) 0.001  | 0.003 | 3    | 19.15(6.08 19.15(6.02 50.25    | 4.22(2.78) 18.67(7.15) 0.001 | 0.002 |  |  |  |
| surgical and medical procedures                      | life support                              | 3    | 10.7(3.43, 10.7(3.43, 26.09     | 3.4(1.98) 10.59(4.09) 0.003  | 0.009 | 3    | 9.53(3.05, 9.53(3.06, 22.61    | 3.24(1.81) 9.42(3.63) 0.004  | 0.01  |  |  |  |
| surgical and medical procedures                      | palliative sedation                       | 3    | 577.76(131 577.71(131 1079.45   | 8.5(6.8) 361.44(107.0        | 0     |      |                                |                              |       |  |  |  |
| surgical and medical procedures                      | coccygectomy                              | 3    | 361.1(95.7 361.07(95. 783.42    | 8.04(6.41) 262.87(86.0       | 0     |      |                                |                              |       |  |  |  |
| surgical and medical procedures                      | rest regimen                              | 4    | 296.3(96.6 296.26(96. 900.1     | 7.83(6.4) 226.79(88.0        | 0     |      |                                |                              |       |  |  |  |
| surgical and medical procedures                      | therapeutic embolisation                  | 4    | 30.57(11.3 30.57(11.2 110.88    | 4.89(3.6) 29.66(12.80) 0     | 0     |      |                                |                              |       |  |  |  |
| surgical and medical procedures                      | oxygen therapy                            | 13   | 16.56(9.57 16.56(9.57 186.82    | 4.03(3.26) 16.29(10.30) 0    | 0     |      |                                |                              |       |  |  |  |
| surgical and medical procedures                      | sleep disorder therapy                    |      |                                 |                              |       | 3    | 28.34(8.94 28.34(8.92 76.09    | 4.77(3.32) 27.29(10.30       | 0.001 |  |  |  |
| surgical and medical procedures                      | drug therapy                              |      |                                 |                              |       | 4    | 27.26(10.0 27.25(10.0 97.41    | 4.72(3.42) 26.28(11.30       | 0     |  |  |  |
| surgical and medical procedures                      | analgesic therapy                         |      |                                 |                              |       | 4    | 25.31(9.33 25.31(9.31 90.16    | 4.61(3.32) 24.47(10.60       | 0     |  |  |  |
| surgical and medical procedures                      | drug detoxification                       |      |                                 |                              |       | 5    | 8.42(3.48, 8.41(3.48, 32.29    | 3.06(1.9) 8.33(3.98) 0       | 0.001 |  |  |  |
| surgical and medical procedures                      | intensive care                            |      |                                 |                              |       | 5    | 7.7(3.19, 17.7(3.19, 128.84    | 2.93(1.77) 7.63(3.65) 0.001  | 0.002 |  |  |  |
| respiratory, thoracic and mediastinal disorders      | apnoeic attack                            | 6    | 27.91(12.4 27.91(12.5 151.28    | 4.76(3.68) 27.15(13.70) 0    | 0     | 9    | 25.62(13.1 25.61(13.1 205.42   | 4.63(3.72) 24.75(14.10       | 0     |  |  |  |
| respiratory, thoracic and mediastinal disorders      | respiratory depression                    | 75   | 16.03(12.7 15.99(12.6 1036.92   | 3.98(3.65) 15.75(13.00) 0    | 0     | 101  | 13.86(11.3 13.81(11.3 1177.25  | 3.76(3.48) 13.56(11.50       | 0     |  |  |  |
| respiratory, thoracic and mediastinal disorders      | diaphragmatic paralysis                   | 5    | 20.84(8.59 20.84(8.63 92.44     | 4.35(3.18) 20.42(9.73) 0     | 0     |      |                                |                              |       |  |  |  |
| respiratory, thoracic and mediastinal disorders      | pulmonary vascular disorder               | 4    | 20.17(7.49 20.16(7.42 71.36     | 4.31(3.02) 19.77(8.63) 0     | 0     |      |                                |                              |       |  |  |  |
| respiratory, thoracic and mediastinal disorders      | pneumothorax spontaneous                  | 3    | 12.9(4.13, 12.9(4.14, 32.48     | 3.67(2.24) 12.74(4.91) 0.002 | 0.006 |      |                                |                              |       |  |  |  |
| respiratory, thoracic and mediastinal disorders      | hypopnoea                                 | 18   | 10.25(6.44 10.25(6.4, 148.67    | 3.34(2.69) 10.15(6.88) 0     | 0     |      |                                |                              |       |  |  |  |
| respiratory, thoracic and mediastinal disorders      | chylothorax                               |      |                                 |                              |       | 4    | 8.86(3.3, 28.86(3.33, 27.54    | 3.13(1.86) 8.76(3.84) 0.001  | 0.003 |  |  |  |
| respiratory, thoracic and mediastinal disorders      | apnoea                                    |      |                                 |                              |       | 30   | 6.88(4.8, 9.6.88(4.83, 149.24  | 2.77(2.26) 6.82(5.05) 0      | 0     |  |  |  |
| respiratory, thoracic and mediastinal disorders      | hypercapnia                               |      |                                 |                              |       | 11   | 6.57(3.63, 6.57(3.65, 51.43    | 2.7(1.88) 6.51(3.96) 0       | 0     |  |  |  |
| respiratory, thoracic and mediastinal disorders      | infantile apnoea                          |      |                                 |                              |       | 3    | 6.5(2.09, 2.6.5(2.09, 213.84   | 2.69(1.27) 6.45(2.49) 0.012  | 0.025 |  |  |  |
| respiratory, thoracic and mediastinal disorders      | snoring                                   |      |                                 |                              |       | 13   | 6.26(3.62, 6.25(3.61, 56.87    | 2.63(1.87) 6.21(3.93) 0      | 0     |  |  |  |
| congenital, familial and genetic disorders           | spina bifida                              | 9    | 13.72(7.1, 13.71(7.04 104.57    | 3.76(2.86) 13.53(7.8) 0      | 0     | 10   | 12.46(6.67 12.45(6.65 103.51   | 3.62(2.75) 12.25(7.26) 0     | 0     |  |  |  |
| congenital, familial and genetic disorders           | congenital anomaly                        | 21   | 10.5(6.83, 10.49(6.82 178.42    | 3.38(2.77) 10.39(7.25) 0     | 0     | 32   | 10.44(7.36 10.43(7.33 268.88   | 3.36(2.87) 10.29(7.68) 0     | 0     |  |  |  |
| congenital, familial and genetic disorders           | hypermobility syndrome                    | 6    | 22.14(9.85 22.13(9.91 118.36    | 4.44(3.35) 21.66(11) 0       | 0     |      |                                |                              |       |  |  |  |
| congenital, familial and genetic disorders           | multiple congenital abnormalities         | 7    | 15.01(7.12 15.01(7.13 90.14     | 3.89(2.88) 14.8(7.92) 0      | 0     |      |                                |                              |       |  |  |  |
| congenital, familial and genetic disorders           | congenital hearing disorder               |      |                                 |                              |       | 4    | 39.37(14.3 39.36(14.4 141.68   | 5.22(3.92) 37.34(16.00       | 0     |  |  |  |
| congenital, familial and genetic disorders           | congenital choroid plexus cyst            |      |                                 |                              |       | 4    | 31.15(11.4 31.14(11.4 111.79   | 4.9(3.6) 29.88(12.90         | 0     |  |  |  |









|                                                      |                                                   |     |                                |                             |       |     |                                |                             |       |
|------------------------------------------------------|---------------------------------------------------|-----|--------------------------------|-----------------------------|-------|-----|--------------------------------|-----------------------------|-------|
| general disorders and administration site conditions | catheter site granuloma                           | 4   | 174.47(57.174.46(57.536.55     | 7.09(5.67) 135.91(53.0      | 0     | 3   | 92.67(27.192.66(26.9229.06     | 6.29(4.74) 78.19(27.80      | 0     |
| general disorders and administration site conditions | injection site granuloma                          | 9   | 53.36(27.53.35(26.8425.2       | 5.62(4.69) 49.15(27.70      | 0     | 14  | 133.1(73.7133.05(73.1445.6     | 6.71(5.91) 105.04(64.0      | 0     |
| general disorders and administration site conditions | implant site extravasation                        | 9   | 16.12(8.31 16.12(8.28 124.32   | 3.98(3.07) 15.73(9.040      | 0     |     |                                |                             |       |
| general disorders and administration site conditions | implant site discharge                            | 5   | 13.75(5.67 13.75(5.69 57.82    | 3.75(2.58) 13.47(6.420      | 0     |     |                                |                             |       |
| general disorders and administration site conditions | haemorrhagic cyst                                 | 5   | 12.78(5.27 12.77(5.29 53.15    | 3.65(2.48) 12.53(5.970      | 0     |     |                                |                             |       |
| general disorders and administration site conditions | infusion site granuloma                           |     |                                |                             |       | 4   | 219.66(67.219.64(67.602.7      | 7.25(5.78) 152.36(56.0      | 0     |
| general disorders and administration site conditions | medical device site erythema                      |     |                                |                             |       | 3   | 28.51(8.9, 28.51(8.97 75.29    | 4.76(3.29) 27.01(10.20      | 0.001 |
| general disorders and administration site conditions | brain death                                       |     |                                |                             |       | 20  | 8.62(5.54, 8.62(5.49, 132.36   | 3.09(2.46) 8.49(5.86) 0     | 0     |
| respiratory, thoracic and mediastinal disorders      | acute chest syndrome                              | 31  | 53.2(36.85 53.17(36.6 1459.77  | 5.61(5.09) 48.99(36.00      | 0     | 30  | 42.76(29.442.72(29.4 1125.19   | 5.3(4.77) 39.4(28.840       | 0     |
| respiratory, thoracic and mediastinal disorders      | bradypnoea                                        | 26  | 15.01(10.1 15.01(10.1 331.73   | 3.87(3.32) 14.67(10.50      | 0     | 26  | 12.32(8.34 12.31(8.32 263.55   | 3.59(3.04) 12.03(8.690      | 0     |
| respiratory, thoracic and mediastinal disorders      | respiratory arrest                                | 196 | 9.69(8.41, 9.66(8.42, 1498.14  | 3.25(3.05) 9.52(8.46) 0     | 0     | 181 | 8.04(6.94, 8(6.97, 9.1 1092.38 | 2.98(2.77) 7.89(6.98) 0     | 0     |
| respiratory, thoracic and mediastinal disorders      | paranasal cyst                                    | 6   | 30.03(13.230.03(13.1 160.49    | 4.84(3.74) 28.67(14.40      | 0     |     |                                |                             |       |
| respiratory, thoracic and mediastinal disorders      | obliterative bronchiolitis                        | 12  | 14.04(7.92 14.04(7.95 142.03   | 3.78(2.99) 13.74(8.510      | 0     |     |                                |                             |       |
| respiratory, thoracic and mediastinal disorders      | respiratory paralysis                             |     |                                |                             |       | 4   | 30.41(11.030.41(10.9 107.18    | 4.84(3.53) 28.71(12.30      | 0     |
| respiratory, thoracic and mediastinal disorders      | pneumonitis aspiration                            |     |                                |                             |       | 3   | 13.24(4.21 13.24(4.17 33.05    | 3.69(2.25) 12.92(4.950.002  | 0.005 |
| respiratory, thoracic and mediastinal disorders      | hypoventilation                                   |     |                                |                             |       | 24  | 9.81(6.55, 9.8(6.49, 1186.02   | 3.27(2.7) 9.63(6.87) 0      | 0     |
| respiratory, thoracic and mediastinal disorders      | respiratory acidosis                              |     |                                |                             |       | 26  | 8.63(5.86, 8.63(5.83, 172.38   | 3.09(2.54) 8.5(6.14) 0      | 0     |
| respiratory, thoracic and mediastinal disorders      | irregular breathing                               |     |                                |                             |       | 3   | 8.19(2.62, 8.19(2.63, 18.63    | 3.01(1.58) 8.07(3.11) 0.006 | 0.016 |
| respiratory, thoracic and mediastinal disorders      | asphyxia                                          |     |                                |                             |       | 52  | 8.08(6.14, 8.07(6.13, 316.88   | 2.99(2.6) 7.95(6.32) 0      | 0     |
| injury, poisoning and procedural                     | sedation complication                             | 39  | 21.57(15.621.55(15.7 738.26    | 4.38(3.93) 20.85(15.90      | 0     | 20  | 14.59(9.35 14.58(9.29 245.69   | 3.83(3.2) 14.19(9.780       | 0     |
| injury, poisoning and procedural                     | accidental overdose                               | 219 | 9.04(7.91, 9(7.85, 10. 1535.99 | 3.15(2.96) 8.89(7.95) 0     | 0     | 251 | 9.9(8.74, 19.84(8.75, 1955.95  | 3.27(3.09) 9.67(8.71) 0     | 0     |
| injury, poisoning and procedural                     | obstetric procedure complication                  | 6   | 146.56(60. 146.54(60. 699.44   | 6.89(5.71) 118.37(56.0      | 0     |     |                                |                             |       |
| injury, poisoning and procedural                     | thermal burns of eye                              | 3   | 20.82(6.59 20.82(6.55 54.73    | 4.33(2.89) 20.16(7.7) 0     | 0.002 |     |                                |                             |       |
| injury, poisoning and procedural                     | environmental exposure                            | 3   | 19.49(6.17 19.49(6.13 50.99    | 4.24(2.8) 18.92(7.230.001   | 0.002 |     |                                |                             |       |
| injury, poisoning and procedural                     | exposure to contaminated device                   | 4   | 16.62(6.15 16.62(6.12 57.15    | 4.02(2.73) 16.2(7.06) 0     | 0.001 |     |                                |                             |       |
| injury, poisoning and procedural                     | procedural hypotension                            | 10  | 14.3(7.64, 14.3(7.64, 120.87   | 3.81(2.94) 14(8.28) 0       | 0     |     |                                |                             |       |
| injury, poisoning and procedural                     | documented hypersensitivity to administered produ | 9   | 13.84(7.15 13.84(7.11 104.86   | 3.76(2.86) 13.56(7.8) 0     | 0     |     |                                |                             |       |
| injury, poisoning and procedural                     | maternal exposure during delivery                 | 13  | 12.83(7.41 12.82(7.41 138.81   | 3.65(2.89) 12.58(7.940      | 0     |     |                                |                             |       |
| injury, poisoning and procedural                     | carbon monoxide poisoning                         | 3   | 9.16(2.93, 9.16(2.94, 21.48    | 3.18(1.75) 9.04(3.48) 0.005 | 0.013 |     |                                |                             |       |
| injury, poisoning and procedural                     | drug monitoring procedure incorrectly performed   |     |                                |                             |       | 6   | 17.34(7.68 17.34(7.61 89.25    | 4.07(2.98) 16.79(8.490      | 0     |
| injury, poisoning and procedural                     | poisoning                                         |     |                                |                             |       | 109 | 10.95(9.06 10.92(8.98 961.47   | 3.42(3.15) 10.71(9.130      | 0     |
| infections and infestations                          | meningitis herpes                                 | 4   | 23.95(8.82 23.95(8.81 84.63    | 4.53(3.23) 23.08(10) 0      | 0     |     |                                |                             |       |
| infections and infestations                          | lupus vulgaris                                    | 13  | 14.68(8.47 14.67(8.47 161.75   | 3.84(3.08) 14.35(9.060      | 0     |     |                                |                             |       |
| infections and infestations                          | retinitis                                         | 15  | 13.16(7.89 13.16(7.91 164.98   | 3.69(2.97) 12.9(8.41) 0     | 0     |     |                                |                             |       |
| infections and infestations                          | herpes zoster oticus                              | 4   | 10.39(3.87 10.39(3.9, 33.39    | 3.36(2.08) 10.24(4.480.001  | 0.003 |     |                                |                             |       |
| infections and infestations                          | lymph gland infection                             | 4   | 9.32(3.47, 9.32(3.5, 229.27    | 3.2(1.92) 9.2(4.03) 0.001   | 0.004 |     |                                |                             |       |
| infections and infestations                          | pseudomonas bronchitis                            |     |                                |                             |       | 3   | 59.31(17.9 59.3(17.94 153.53   | 5.73(4.22) 53.06(19.40      | 0     |
| infections and infestations                          | herpes simplex meningoencephalitis                |     |                                |                             |       | 3   | 47.83(14.647.82(14.7 125.4     | 5.45(3.96) 43.69(16.20      | 0     |
| infections and infestations                          | whipple's disease                                 |     |                                |                             |       | 4   | 10.4(3.86, 10.4(3.83, 33.3     | 3.35(2.07) 10.21(4.460.001  | 0.002 |
| infections and infestations                          | herpes simplex encephalitis                       |     |                                |                             |       | 3   | 9.32(2.98, 9.32(2.99, 21.88    | 3.2(1.77) 9.17(3.53) 0.005  | 0.012 |
| infections and infestations                          | lower respiratory tract infection fungal          |     |                                |                             |       | 3   | 8.93(2.85, 8.93(2.87, 20.75    | 3.14(1.71) 8.79(3.38) 0.005 | 0.013 |
| surgical and medical procedures                      | detoxification                                    | 5   | 20.77(8.52 20.77(8.6, 90.99    | 4.33(3.15) 20.12(9.540      | 0     | 3   | 9.75(3.11, 9.75(3.13, 23.11    | 3.26(1.83) 9.58(3.68) 0.004 | 0.011 |
| surgical and medical procedures                      | euthanasia                                        | 3   | 15.52(4.94 15.52(4.98 39.75    | 3.92(2.49) 15.16(5.810.001  | 0.004 |     |                                |                             |       |
| surgical and medical procedures                      | patient restraint                                 |     |                                |                             |       | 3   | 32.23(10.0 32.23(9.94 85.22    | 4.92(3.45) 30.32(11.40      | 0.001 |
| surgical and medical procedures                      | drug rehabilitation                               |     |                                |                             |       | 4   | 26.36(9.64 26.36(9.7, 92.64    | 4.65(3.34) 25.07(10.80      | 0     |
| surgical and medical procedures                      | self-medication                                   |     |                                |                             |       | 37  | 10.54(7.61 10.53(7.55 312.59   | 3.37(2.91) 10.33(7.870      | 0     |
| surgical and medical procedures                      | finger amputation                                 |     |                                |                             |       | 6   | 10.05(4.48 10.05(4.5, 47.93    | 3.3(2.22) 9.87(5.02) 0      | 0     |
| gastrointestinal disorders                           | oesophageal motility disorder                     | 5   | 17.35(7.13 17.35(7.18 74.89    | 4.08(2.91) 16.9(8.03) 0     | 0     |     |                                |                             |       |
| gastrointestinal disorders                           | trichoglossia                                     | 4   | 13.96(5.18 13.96(5.14 47.04    | 3.77(2.49) 13.67(5.960      | 0.001 |     |                                |                             |       |
| gastrointestinal disorders                           | oral discharge                                    | 3   | 9.07(2.9, 29.07(2.91, 21.22    | 3.16(1.73) 8.95(3.45) 0.005 | 0.014 |     |                                |                             |       |
| eye disorders                                        | pupillary reflex impaired                         | 18  | 13.14(8.23 13.13(8.2, 197.49   | 3.69(3.03) 12.88(8.710      | 0     | 20  | 14.37(9.21 14.37(9.16 241.69   | 3.81(3.18) 13.99(9.640      | 0     |
| eye disorders                                        | pupil fixed                                       | 17  | 12.36(7.65 12.36(7.72 173.94   | 3.6(2.93) 12.13(8.120       | 0     | 15  | 11.08(6.64 11.08(6.66 134.55   | 3.44(2.73) 10.86(7.080      | 0     |
| eye disorders                                        | lid sulcus deepened                               |     |                                |                             |       | 3   | 15.13(4.8, 15.13(4.76 38.41    | 3.88(2.44) 14.71(5.620.001  | 0.004 |
| congenital, familial and genetic disorders           | foetal megacystis                                 | 3   | 228.99(60. 228.98(60. 495.23   | 7.38(5.75) 166.8(54.90      | 0     |     |                                |                             |       |
| congenital, familial and genetic disorders           | vascular malformation                             | 6   | 39.4(17.26 39.39(17.2 210.91   | 5.21(4.11) 37.07(18.50      | 0     |     |                                |                             |       |
| congenital, familial and genetic disorders           | congenital pulmonary hypertension                 | 3   | 21.81(6.89 21.81(6.86 57.51    | 4.4(2.95) 21.09(8.050       | 0.002 |     |                                |                             |       |
| congenital, familial and genetic disorders           | ductus arteriosus premature closure               | 3   | 13.47(4.29 13.47(4.32 33.88    | 3.72(2.29) 13.2(5.07) 0.002 | 0.005 |     |                                |                             |       |
| congenital, familial and genetic disorders           | newborn persistent pulmonary hypertension         |     |                                |                             |       | 4   | 23.54(8.63 23.53(8.66 82.38    | 4.49(3.19) 22.51(9.720      | 0     |
| skin and subcutaneous tissue disorders               | pruritus allergic                                 | 13  | 10.88(6.28 10.87(6.28 114.52   | 3.42(2.66) 10.7(6.76) 0     | 0     |     |                                |                             |       |
| skin and subcutaneous tissue disorders               | chronic spontaneous urticaria                     | 10  | 10.85(5.8, 10.85(5.79 87.82    | 3.42(2.56) 10.67(6.330      | 0     |     |                                |                             |       |
| reproductive system and breast disorders             | female reproductive tract disorder                | 4   | 16.39(6.07 16.39(6.03 56.3     | 4(2.71) 15.99(6.970         | 0.001 |     |                                |                             |       |
| reproductive system and breast disorders             | perineal pain                                     |     |                                |                             |       | 4   | 7.78(2.9, 27.78(2.92, 23.28    | 2.94(1.66) 7.68(3.36) 0.002 | 0.006 |
| renal and urinary disorders                          | urinary bladder rupture                           | 4   | 20.19(7.46 20.19(7.43 70.61    | 4.29(3) 19.57(8.5) 0        | 0     |     |                                |                             |       |

|                                                                     |                                   |      |                                 |                              |  |      |                                |                              |  |  |  |       |
|---------------------------------------------------------------------|-----------------------------------|------|---------------------------------|------------------------------|--|------|--------------------------------|------------------------------|--|--|--|-------|
| renal and urinary disorders                                         | nephrosclerosis                   | 10   | 12.19(6.52 12.19(6.51 100.69    | 3.58(2.72) 11.97(7.09) 0     |  |      |                                |                              |  |  |  |       |
| renal and urinary disorders                                         | bladder neck obstruction          |      |                                 |                              |  | 4    | 22.72(8.34 22.72(8.36 79.41    | 4.44(3.15) 21.77(9.41) 0     |  |  |  | 0     |
| neoplasms benign, malignant and unspecified (incl cysts and polyps) | systemic mastocytosis             | 4    | 19.23(7.11 19.23(7.08 67.02     | 4.22(2.93) 18.67(8.12) 0     |  | 3    | 16.66(5.27 16.66(5.24 42.71    | 4.01(2.57) 16.15(6.17) 0.001 |  |  |  | 0.003 |
| neoplasms benign, malignant and unspecified (incl cysts and polyps) | neuroendocrine tumour of the lung | 3    | 39.82(12.3 39.82(12.2 106.59    | 5.23(3.76) 37.45(14.0) 0     |  |      |                                |                              |  |  |  |       |
| neoplasms benign, malignant and unspecified (incl cysts and polyps) | metastases to eye                 | 6    | 33.93(14.9 33.92(14.8 181.62    | 5.01(3.91) 32.19(16.1) 0     |  |      |                                |                              |  |  |  |       |
| cardiac disorders                                                   | rhythm idioventricular            | 4    | 17.83(6.6, 17.83(6.56 61.73     | 4.12(2.83) 17.35(7.55) 0     |  |      |                                |                              |  |  |  |       |
| cardiac disorders                                                   | cardiovascular symptom            | 3    | 10.41(3.32 10.41(3.34 25.08     | 3.36(1.93) 10.25(3.94) 0.003 |  |      |                                |                              |  |  |  |       |
| cardiac disorders                                                   | myocardial fibrosis               |      |                                 |                              |  | 7    | 8.92(4.22, 8.92(4.24, 48.32    | 3.13(2.12) 8.78(4.69) 0      |  |  |  | 0     |
| vascular disorders                                                  | neonatal hypotension              |      |                                 |                              |  | 5    | 18.86(7.72 18.86(7.66 81.47    | 4.19(3.01) 18.21(8.62) 0     |  |  |  | 0     |
| vascular disorders                                                  | visceral congestion               |      |                                 |                              |  | 8    | 15.33(7.58 15.32(7.57 103.89   | 3.9(2.94) 14.89(8.27) 0      |  |  |  | 0     |
| immune system disorders                                             | drug hypersensitivity             | 5372 | 31.77(30.8 28.41(27.8 136291.89 | 4.77(4.72) 27.19(26.5) 0     |  | 1430 | 20.08(19.0 19.33(18.2 23975.33 | 4.22(4.14) 18.64(17.8) 0     |  |  |  | 0     |
| immune system disorders                                             | contrast media allergy            | 24   | 16.91(11.2 16.9(11.2, 349.42    | 4.04(3.47) 16.47(11.7) 0     |  |      |                                |                              |  |  |  |       |
| endocrine disorders                                                 | hypogonadism male                 |      |                                 |                              |  | 19   | 46.74(29.2 46.71(29.1 776.57   | 5.42(4.76) 42.77(28.8) 0     |  |  |  | 0     |
| endocrine disorders                                                 | carcinoid crisis                  |      |                                 |                              |  | 4    | 23.82(8.73 23.82(8.77 83.41    | 4.51(3.21) 22.77(9.83) 0     |  |  |  | 0     |
| musculoskeletal and connective tissue                               | seronegative arthritis            | 8    | 9.89(4.92, 9.89(4.88, 62.9      | 3.28(2.33) 9.75(5.43) 0      |  |      |                                |                              |  |  |  |       |
| hepatobiliary disorders                                             | sphincter of oddi dysfunction     | 15   | 35.93(21.3 35.92(21.1 480.9     | 5.09(4.36) 33.98(21.9) 0     |  | 9    | 49.99(25.1 49.97(25.1 392.28   | 5.51(4.57) 45.48(25.6) 0     |  |  |  | 0     |

**morphine stulfa**

| soc_english                                          |                                             | morphine sulfate female |                               |                          |                           | morphine sulfate male |                               |                            |                       |                           |       |
|------------------------------------------------------|---------------------------------------------|-------------------------|-------------------------------|--------------------------|---------------------------|-----------------------|-------------------------------|----------------------------|-----------------------|---------------------------|-------|
| pt_english                                           |                                             | Case                    | Repo                          | ROR(95% PRR(95% chisq    | IC(IC025) EBGM(EE p.value | p.adj                 | Case                          | Repo                       | ROR(95% PRR(95% chisq | IC(IC025) EBGM(EE p.value | p.adj |
| investigations                                       | postmortem blood drug level abnormal        | 7                       | 24.15(11.3 24.15(11.2 149.42  | 4.54(3.52) 23.27(12.3) 0 |                           | 4                     | 9.55(3.55, 9.55(3.58, 30.04   | 3.23(1.95) 9.39(4.1) 0.001 |                       |                           | 0.003 |
| investigations                                       | opiates positive                            |                         |                               |                          |                           |                       |                               |                            |                       |                           |       |
| investigations                                       | postmortem blood drug level increased       | 6                       | 13.57(6.04 13.57(6.08 68.34   | 3.73(2.65) 13.3(6.76) 0  |                           | 15                    | 28.2(16.76 28.19(16.6 372.1   | 4.74(4.01) 26.72(17.2) 0   |                       |                           | 0     |
| investigations                                       | toxicologic test abnormal                   | 68                      | 29.22(22.9 29.18(23.0 1766.16 | 4.8(4.45) 27.89(22.7) 0  |                           | 47                    | 19.94(14.9 19.92(14.8 811.92  | 4.26(3.85) 19.19(15.0) 0   |                       |                           | 0     |
| investigations                                       | respiratory rate decreased                  |                         |                               |                          |                           |                       |                               |                            |                       |                           |       |
| investigations                                       | drug screen negative                        |                         |                               |                          |                           |                       |                               |                            |                       |                           |       |
| investigations                                       | chest expansion decreased                   |                         |                               |                          |                           |                       |                               |                            |                       |                           |       |
| investigations                                       | breath sounds absent                        |                         |                               |                          |                           |                       |                               |                            |                       |                           |       |
| investigations                                       | antidepressant drug level above therapeutic |                         |                               |                          |                           |                       |                               |                            |                       |                           |       |
| investigations                                       | vital functions abnormal                    |                         |                               |                          |                           |                       |                               |                            |                       |                           |       |
| investigations                                       | corneal reflex decreased                    |                         |                               |                          |                           |                       |                               |                            |                       |                           |       |
| investigations                                       | pco2 increased                              | 5                       | 9.54(3.94, 9.54(3.95, 37.64   | 3.23(2.07) 9.41(4.49) 0  | 0.001                     | 12                    | 20.6(11.56 20.59(11.6 214.73  | 4.31(3.51) 19.81(12.2) 0   |                       |                           | 0     |
| investigations                                       | antasthmatic drug level                     |                         |                               |                          |                           |                       |                               |                            |                       |                           |       |
| investigations                                       | analgesic drug level                        |                         |                               |                          |                           |                       |                               |                            |                       |                           |       |
| investigations                                       | postmortem blood drug level                 |                         |                               |                          |                           |                       |                               |                            |                       |                           |       |
| investigations                                       | oxygen saturation                           |                         |                               |                          |                           |                       |                               |                            |                       |                           |       |
| investigations                                       | forced vital capacity decreased             |                         |                               |                          |                           |                       |                               |                            |                       |                           |       |
| investigations                                       | inspiratory capacity decreased              |                         |                               |                          |                           |                       |                               |                            |                       |                           |       |
| investigations                                       | glomerular filtration rate increased        |                         |                               |                          |                           |                       |                               |                            |                       |                           |       |
| investigations                                       | pulmonary function test abnormal            |                         |                               |                          |                           |                       |                               |                            |                       |                           |       |
| investigations                                       | drug specific antibody                      |                         |                               |                          |                           |                       |                               |                            |                       |                           |       |
| investigations                                       | pulse absent                                |                         |                               |                          |                           |                       |                               |                            |                       |                           |       |
| injury, poisoning and procedural                     | anaesthetic complication neurological       |                         |                               |                          |                           |                       |                               |                            |                       |                           |       |
| injury, poisoning and procedural                     | postoperative ileus                         |                         |                               |                          |                           |                       |                               |                            |                       |                           |       |
| injury, poisoning and procedural                     | overdose                                    |                         |                               |                          |                           | 1288                  | 7.94(7.51, 7.7(7.26, 87426.21 | 2.93(2.84) 7.6(7.25) 0     |                       |                           | 0     |
| injury, poisoning and procedural                     | foetal exposure during pregnancy            |                         |                               |                          |                           |                       |                               |                            |                       |                           |       |
| injury, poisoning and procedural                     | decompression sickness                      |                         |                               |                          |                           |                       |                               |                            |                       |                           |       |
| injury, poisoning and procedural                     | vascular access site thrombosis             |                         |                               |                          |                           |                       |                               |                            |                       |                           |       |
| injury, poisoning and procedural                     | ocular procedural complication              |                         |                               |                          |                           |                       |                               |                            |                       |                           |       |
| injury, poisoning and procedural                     | product name confusion                      |                         |                               |                          |                           |                       |                               |                            |                       |                           |       |
| injury, poisoning and procedural                     | labelled drug-drug interaction issue        |                         |                               |                          |                           |                       |                               |                            |                       |                           |       |
| injury, poisoning and procedural                     | post procedural discharge                   |                         |                               |                          |                           |                       |                               |                            |                       |                           |       |
| injury, poisoning and procedural                     | post-traumatic pain                         |                         |                               |                          |                           |                       |                               |                            |                       |                           |       |
| injury, poisoning and procedural                     | spinal shock                                |                         |                               |                          |                           |                       |                               |                            |                       |                           |       |
| injury, poisoning and procedural                     | febrile nonhaemolytic transfusion reaction  |                         |                               |                          |                           |                       |                               |                            |                       |                           |       |
| injury, poisoning and procedural                     | paternal exposure timing unspecified        |                         |                               |                          |                           |                       |                               |                            |                       |                           |       |
| injury, poisoning and procedural                     | transfusion-related acute lung injury       |                         |                               |                          |                           |                       |                               |                            |                       |                           |       |
| injury, poisoning and procedural                     | alcohol poisoning                           |                         |                               |                          |                           | 22                    | 8.36(5.49, 8.36(5.54, 140.12  | 3.04(2.45) 8.23(5.79) 0    |                       |                           | 0     |
| injury, poisoning and procedural                     | exposure to toxic agent                     | 31                      | 14.32(10.0 14.31(10.0 374.93  | 3.81(3.3) 14(10.39) 0    | 0                         | 65                    | 36.61(28.4 36.54(28.3 2092.5  | 5.09(4.73) 34.1(27.6) 0    |                       |                           | 0     |
| injury, poisoning and procedural                     | exposure via father                         |                         |                               |                          |                           |                       |                               |                            |                       |                           |       |
| general disorders and administration site conditions | drug withdrawal syndrome neonatal           | 103                     | 13.91(11.4 13.88(11.4 1204.22 | 3.77(3.48) 13.6(11.55) 0 |                           |                       |                               |                            |                       |                           |       |
| general disorders and administration site conditions | developmental delay                         | 60                      | 11.76(9.11 11.75(9.11 578.8   | 3.53(3.16) 11.54(9.32) 0 |                           |                       |                               |                            |                       |                           |       |
| general disorders and administration site conditions | drug withdrawal syndrome                    | 720                     | 10.78(10.0 10.64(9.84 6189.25 | 3.39(3.28) 10.47(9.84) 0 |                           | 826                   | 10.82(10.0 10.6(9.99, 7042.78 | 3.38(3.28) 10.39(9.81) 0   |                       |                           | 0     |
| general disorders and administration site conditions | accidental death                            | 14                      | 14.2(8.36, 14.2(8.36, 167.89  | 3.8(3.06) 13.9(8.92) 0   | 0                         | 37                    | 19.92(14.3 19.9(14.26 638.36  | 4.26(3.79) 19.17(14.5) 0   |                       |                           | 0     |

|                                                      |                                           |      |                                |                         |       |      |                                |                         |       |
|------------------------------------------------------|-------------------------------------------|------|--------------------------------|-------------------------|-------|------|--------------------------------|-------------------------|-------|
| general disorders and administration site conditions | drug tolerance                            | 38   | 10.48(7.61 10.48(7.66 320.22   | 3.37(2.91) 10.32(7.89 0 | 0     | 38   | 10.23(7.42 10.22(7.47 309.6    | 3.33(2.87) 10.03(7.67 0 | 0     |
| general disorders and administration site conditions | inadequate analgesia                      | 79   | 11.29(9.04 11.28(9.09 726.48   | 3.47(3.15) 11.09(9.2) 0 | 0     | 100  | 14.95(12.2 14.91(12.2 1259.7   | 3.86(3.57) 14.5(12.27 0 | 0     |
| general disorders and administration site conditions | foreign body reaction                     |      |                                |                         |       |      |                                |                         |       |
| general disorders and administration site conditions | fat tissue decreased                      |      |                                |                         |       |      |                                |                         |       |
| general disorders and administration site conditions | drug tolerance increased                  | 7    | 13.88(6.56 13.88(6.59 81.79    | 3.76(2.75) 13.59(7.26 0 | 0     | 13   | 17.95(10.3 17.95(10.3 200.73   | 4.12(3.35) 17.35(10.90  | 0     |
| general disorders and administration site conditions | administration site bruise                |      |                                |                         |       |      |                                |                         |       |
| general disorders and administration site conditions | administration site swelling              |      |                                |                         |       |      |                                |                         |       |
| general disorders and administration site conditions | administration site erythema              | 4    | 15.08(5.59 15.08(5.55 51.31    | 3.88(2.6) 14.74(6.43 0  | 0.001 |      |                                |                         |       |
| general disorders and administration site conditions | feeling of relaxation                     |      |                                |                         |       |      |                                |                         |       |
| general disorders and administration site conditions | temperature regulation disorder           |      |                                |                         |       |      |                                |                         |       |
| general disorders and administration site conditions | infusion site mass                        |      |                                |                         |       |      |                                |                         |       |
| general disorders and administration site conditions | pain                                      |      |                                |                         |       |      |                                |                         |       |
| general disorders and administration site conditions | breakthrough pain                         |      |                                |                         |       | 18   | 13.22(8.28 13.22(8.26 197.99   | 3.69(3.03) 12.9(8.72) 0 | 0     |
| psychiatric disorders                                | substance dependence                      | 44   | 145.35(10. 145.22(10. 5091.32  | 6.88(6.42) 117.51(89. 0 | 0     | 52   | 90.93(67.690.8(67.67 3901.57   | 6.26(5.85) 76.86(60.00  | 0     |
| psychiatric disorders                                | learning disability                       | 54   | 17.11(13.0 17.09(12.9 795.96   | 4.06(3.67) 16.65(13.2 0 | 0     | 71   | 12.03(9.5, 12.01(9.49 699.59   | 3.55(3.22) 11.75(9.64 0 | 0     |
| psychiatric disorders                                | self esteem inflated                      |      |                                |                         |       |      |                                |                         |       |
| psychiatric disorders                                | drug dependence                           | 1588 | 16.91(16.0 16.4(15.46 22402.07 | 4(3.93) 15.99(15.3 0    | 0     | 2233 | 14.19(13.5 13.39(12.8 25034.16 | 3.71(3.64) 13.06(12.50  | 0     |
| psychiatric disorders                                | substance abuse                           | 188  | 46.88(40.4 46.7(39.92 7811.28  | 5.44(5.23) 43.45(38.3 0 | 0     | 286  | 35.73(31.6 35.46(31.5 8938.06  | 5.05(4.88) 33.15(29.90  | 0     |
| psychiatric disorders                                | emotional distress                        |      |                                |                         |       | 933  | 9.28(8.69, 9.07(8.55, 6593.8   | 3.16(3.06) 8.92(8.44) 0 | 0     |
| psychiatric disorders                                | self esteem decreased                     | 18   | 9.23(5.8, 19.23(5.77, 130.1    | 3.19(2.53) 9.11(6.17) 0 | 0     | 18   | 8.69(5.45, 8.69(5.43, 120.33   | 3.1(2.44) 8.55(5.79) 0  | 0     |
| psychiatric disorders                                | substance use disorder                    |      |                                |                         |       |      |                                |                         |       |
| psychiatric disorders                                | somatic symptom disorder                  |      |                                |                         |       |      |                                |                         |       |
| psychiatric disorders                                | post-traumatic stress disorder            |      |                                |                         |       |      |                                |                         |       |
| psychiatric disorders                                | suicidal behaviour                        |      |                                |                         |       |      |                                |                         |       |
| psychiatric disorders                                | euphoric mood                             |      |                                |                         |       |      |                                |                         |       |
| psychiatric disorders                                | sexually inappropriate behaviour          |      |                                |                         |       | 6    | 10.82(4.82 10.82(4.84 52.34    | 3.41(2.33) 10.61(5.39 0 | 0     |
| psychiatric disorders                                | drug abuse                                | 764  | 16.49(15.3 16.24(15.0 10657.23 | 3.99(3.88) 15.85(14.90  | 0     | 1051 | 14.03(13.1 13.66(12.8 12021.74 | 3.74(3.65) 13.32(12.60  | 0     |
| psychiatric disorders                                | mental disorder                           |      |                                |                         |       |      |                                |                         |       |
| psychiatric disorders                                | alcohol abuse                             |      |                                |                         |       |      |                                |                         |       |
| nervous system disorders                             | judgement impaired                        | 15   | 13.92(8.35 13.92(8.36 175.87   | 3.77(3.05) 13.63(8.88 0 | 0     | 12   | 9.39(5.3, 19.38(5.31, 88.21    | 3.21(2.41) 9.23(5.72) 0 | 0     |
| nervous system disorders                             | unresponsive to stimuli                   |      |                                |                         |       |      |                                |                         |       |
| nervous system disorders                             | reversible ischaemic neurological deficit |      |                                |                         |       |      |                                |                         |       |
| nervous system disorders                             | pseudostroke                              |      |                                |                         |       |      |                                |                         |       |
| nervous system disorders                             | toxic leukoencephalopathy                 | 5    | 11.35(4.69 11.35(4.7, 46.33    | 3.48(2.31) 11.16(5.32 0 | 0     | 18   | 33.84(20.9 33.82(21.1 536.62   | 4.99(4.32) 31.72(21.20  | 0     |
| nervous system disorders                             | hypertensive encephalopathy               |      |                                |                         |       |      |                                |                         |       |
| nervous system disorders                             | cholinergic syndrome                      |      |                                |                         |       |      |                                |                         |       |
| nervous system disorders                             | hyporesponsive to stimuli                 |      |                                |                         |       |      |                                |                         |       |
| nervous system disorders                             | chanter syndrome                          |      |                                |                         |       |      |                                |                         |       |
| nervous system disorders                             | central pain syndrome                     |      |                                |                         |       |      |                                |                         |       |
| nervous system disorders                             | hyperaesthesia                            |      |                                |                         |       | 48   | 9.46(7.11, 9.45(7.04, 355.78   | 3.22(2.81) 9.29(7.31) 0 | 0     |
| nervous system disorders                             | arachnoiditis                             |      |                                |                         |       | 5    | 10.74(4.43 10.74(4.45 43.24    | 3.4(2.23) 10.54(5.02 0  | 0.001 |
| nervous system disorders                             | psychomotor skills impaired               |      |                                |                         |       | 39   | 17.07(12.4 17.06(12.4 569.84   | 4.05(3.59) 16.52(12.60  | 0     |
| nervous system disorders                             | allodynia                                 | 8    | 9.99(4.97, 9.99(4.93, 63.68    | 3.3(2.35) 9.84(5.49) 0  | 0     | 14   | 26.72(15.6 26.71(15.7 328.74   | 4.67(3.92) 25.39(16.10  | 0     |
| nervous system disorders                             | sleep deficit                             |      |                                |                         |       |      |                                |                         |       |
| nervous system disorders                             | seizure like phenomena                    |      |                                |                         |       |      |                                |                         |       |
| surgical and medical procedures                      | fluid replacement                         |      |                                |                         |       |      |                                |                         |       |
| surgical and medical procedures                      | life support                              |      |                                |                         |       |      |                                |                         |       |
| surgical and medical procedures                      | palliative sedation                       |      |                                |                         |       |      |                                |                         |       |
| surgical and medical procedures                      | coccygectomy                              |      |                                |                         |       |      |                                |                         |       |
| surgical and medical procedures                      | rest regimen                              |      |                                |                         |       |      |                                |                         |       |
| surgical and medical procedures                      | therapeutic embolisation                  |      |                                |                         |       |      |                                |                         |       |
| surgical and medical procedures                      | oxygen therapy                            |      |                                |                         |       |      |                                |                         |       |
| surgical and medical procedures                      | sleep disorder therapy                    |      |                                |                         |       |      |                                |                         |       |
| surgical and medical procedures                      | drug therapy                              |      |                                |                         |       |      |                                |                         |       |
| surgical and medical procedures                      | analgesic therapy                         |      |                                |                         |       |      |                                |                         |       |
| surgical and medical procedures                      | drug detoxification                       |      |                                |                         |       |      |                                |                         |       |
| surgical and medical procedures                      | intensive care                            |      |                                |                         |       |      |                                |                         |       |
| respiratory, thoracic and mediastinal disorders      | apnoeic attack                            | 4    | 11.69(4.35 11.69(4.39 38.35    | 3.52(2.24) 11.49(5.02 0 | 0.002 |      |                                |                         |       |

|                                                                     |                                           |     |                               |            |              |   |     |                               |            |              |       |
|---------------------------------------------------------------------|-------------------------------------------|-----|-------------------------------|------------|--------------|---|-----|-------------------------------|------------|--------------|-------|
| respiratory, thoracic and mediastinal disorders                     | respiratory depression                    | 198 | 27.63(23.9 27.52(23.9 4842.83 | 4.72(4.52) | 26.38(23.40) | 0 | 200 | 19.54(16.9 19.44(16.9 3367    | 4.23(4.02) | 18.74(16.60) | 0     |
| respiratory, thoracic and mediastinal disorders                     | diaphragmatic paralysis                   |     |                               |            |              |   |     |                               |            |              |       |
| respiratory, thoracic and mediastinal disorders                     | pulmonary vascular disorder               |     |                               |            |              |   |     |                               |            |              |       |
| respiratory, thoracic and mediastinal disorders                     | pneumothorax spontaneous                  |     |                               |            |              |   |     |                               |            |              |       |
| respiratory, thoracic and mediastinal disorders                     | hypopnoea                                 |     |                               |            |              |   |     |                               |            |              |       |
| respiratory, thoracic and mediastinal disorders                     | chylothorax                               |     |                               |            |              |   |     |                               |            |              |       |
| respiratory, thoracic and mediastinal disorders                     | apnoea                                    | 59  | 10.7(8.27, 10.68(8.28 509.02  | 3.39(3.03) | 10.52(8.48 0 | 0 | 55  | 8.88(6.8, 18.87(6.74, 377.08  | 3.13(2.74) | 8.73(6.98) 0 | 0     |
| respiratory, thoracic and mediastinal disorders                     | hypercapnia                               | 24  | 11.42(7.62 11.41(7.56 223.84  | 3.49(2.92) | 11.22(8) 0   | 0 |     |                               |            |              |       |
| respiratory, thoracic and mediastinal disorders                     | infantile apnoea                          |     |                               |            |              |   |     |                               |            |              |       |
| respiratory, thoracic and mediastinal disorders                     | snoring                                   |     |                               |            |              |   |     |                               |            |              |       |
| congenital, familial and genetic disorders                          | spina bifida                              |     |                               |            |              |   |     |                               |            |              |       |
| congenital, familial and genetic disorders                          | congenital anomaly                        |     |                               |            |              |   |     |                               |            |              |       |
| congenital, familial and genetic disorders                          | hypermobility syndrome                    |     |                               |            |              |   |     |                               |            |              |       |
| congenital, familial and genetic disorders                          | multiple congenital abnormalities         |     |                               |            |              |   |     |                               |            |              |       |
| congenital, familial and genetic disorders                          | congenital hearing disorder               |     |                               |            |              |   |     |                               |            |              |       |
| congenital, familial and genetic disorders                          | congenital choroid plexus cyst            |     |                               |            |              |   |     |                               |            |              |       |
| congenital, familial and genetic disorders                          | kidney duplex                             |     |                               |            |              |   |     |                               |            |              |       |
| congenital, familial and genetic disorders                          | congenital megaureter                     |     |                               |            |              |   |     |                               |            |              |       |
| congenital, familial and genetic disorders                          | congenital hydronephrosis                 |     |                               |            |              |   |     |                               |            |              |       |
| infections and infestations                                         | extradural abscess                        |     |                               |            |              |   |     |                               |            |              |       |
| infections and infestations                                         | vascular access site infection            |     |                               |            |              |   |     |                               |            |              |       |
| infections and infestations                                         | human immunodeficiency virus transmission |     |                               |            |              |   |     |                               |            |              |       |
| infections and infestations                                         | lower respiratory tract infection viral   |     |                               |            |              |   | 5   | 16.26(6.67 16.26(6.73 69.31   | 3.98(2.8)  | 15.77(7.48 0 | 0     |
| infections and infestations                                         | virologic failure                         |     |                               |            |              |   |     |                               |            |              |       |
| infections and infestations                                         | spinal cord infection                     |     |                               |            |              |   |     |                               |            |              |       |
| infections and infestations                                         | respiratory tract infection bacterial     |     |                               |            |              |   |     |                               |            |              |       |
| infections and infestations                                         | systemic infection                        |     |                               |            |              |   |     |                               |            |              |       |
| gastrointestinal disorders                                          | narcotic bowel syndrome                   | 5   | 41.83(16.9 41.82(16.9 186.46  | 5.29(4.1)  | 39.21(18.30) | 0 | 3   | 24.71(7.75 24.71(7.77 65      | 4.56(3.1)  | 23.58(8.94 0 | 0.001 |
| gastrointestinal disorders                                          | abdominal compartment syndrome            |     |                               |            |              |   |     |                               |            |              |       |
| gastrointestinal disorders                                          | intestinal pseudo-obstruction             | 10  | 27.89(14.8 27.88(14.8 247.86  | 4.74(3.87) | 26.71(15.70) | 0 |     |                               |            |              |       |
| gastrointestinal disorders                                          | faecal vomiting                           |     |                               |            |              |   |     |                               |            |              |       |
| gastrointestinal disorders                                          | appendicolith                             |     |                               |            |              |   |     |                               |            |              |       |
| gastrointestinal disorders                                          | gastrointestinal tract irritation         |     |                               |            |              |   |     |                               |            |              |       |
| skin and subcutaneous tissue disorders                              | adiposis dolorosa                         |     |                               |            |              |   |     |                               |            |              |       |
| skin and subcutaneous tissue disorders                              | urticaria thermal                         |     |                               |            |              |   |     |                               |            |              |       |
| skin and subcutaneous tissue disorders                              | needle track marks                        |     |                               |            |              |   | 7   | 29.57(13.7 29.57(13.7 182.3   | 4.8(3.77)  | 27.95(14.70) | 0     |
| skin and subcutaneous tissue disorders                              | skin ulcer haemorrhage                    |     |                               |            |              |   |     |                               |            |              |       |
| skin and subcutaneous tissue disorders                              | generalised bullous fixed drug eruption   |     |                               |            |              |   |     |                               |            |              |       |
| neoplasms benign, malignant and unspecified (incl cysts and polyps) | brain stem glioma                         |     |                               |            |              |   |     |                               |            |              |       |
| neoplasms benign, malignant and unspecified (incl cysts and polyps) | malignant cranial nerve neoplasm          |     |                               |            |              |   |     |                               |            |              |       |
| neoplasms benign, malignant and unspecified (incl cysts and polyps) | retro-orbital neoplasm                    |     |                               |            |              |   |     |                               |            |              |       |
| neoplasms benign, malignant and unspecified (incl cysts and polyps) | neuroblastoma recurrent                   |     |                               |            |              |   |     |                               |            |              |       |
| eye disorders                                                       | vision abnormal neonatal                  | 11  | 39.06(21.2 39.05(21.2 383.32  | 5.2(4.36)  | 36.76(22.00) | 0 | 8   | 19.97(9.85 19.97(9.86 138.54  | 4.27(3.3)  | 19.23(10.60) | 0     |
| eye disorders                                                       | orbital oedema                            |     |                               |            |              |   |     |                               |            |              |       |
| eye disorders                                                       | hypoaesthesia eye                         |     |                               |            |              |   |     |                               |            |              |       |
| eye disorders                                                       | miosis                                    | 103 | 22.97(18.8 22.92(18.8 2081.32 | 4.47(4.19) | 22.13(18.70) | 0 | 114 | 16.1(13.36 16.05(13.1 1559.04 | 3.96(3.69) | 15.58(13.30) | 0     |
| vascular disorders                                                  | foreign body embolism                     |     |                               |            |              |   |     |                               |            |              |       |
| vascular disorders                                                  | vein collapse                             |     |                               |            |              |   |     |                               |            |              |       |
| vascular disorders                                                  | arterial insufficiency                    |     |                               |            |              |   |     |                               |            |              |       |
| musculoskeletal and connective tissue disorders                     | rib deformity                             |     |                               |            |              |   |     |                               |            |              |       |
| musculoskeletal and connective tissue disorders                     | dupuytren's contracture                   |     |                               |            |              |   |     |                               |            |              |       |
| musculoskeletal and connective tissue disorders                     | costochondritis                           |     |                               |            |              |   |     |                               |            |              |       |
| immune system disorders                                             | secondary amyloidosis                     |     |                               |            |              |   |     |                               |            |              |       |
| immune system disorders                                             | allergy to metals                         |     |                               |            |              |   |     |                               |            |              |       |
| immune system disorders                                             | allergy to chemicals                      |     |                               |            |              |   |     |                               |            |              |       |
| reproductive system and breast disorders                            | vaginal flatulence                        | 5   | 13.51(5.57 13.51(5.59 56.66   | 3.73(2.56) | 13.24(6.31 0 | 0 |     |                               |            |              |       |
| reproductive system and breast disorders                            | adnexal torsion                           |     |                               |            |              |   |     |                               |            |              |       |
| renal and urinary disorders                                         | renal artery thrombosis                   |     |                               |            |              |   |     |                               |            |              |       |
| renal and urinary disorders                                         | urinary tract discomfort                  |     |                               |            |              |   |     |                               |            |              |       |
| pregnancy, puerperium and perinatal disorders                       | stillbirth                                |     |                               |            |              |   |     |                               |            |              |       |
| metabolism and nutrition disorders                                  | protein deficiency                        |     |                               |            |              |   |     |                               |            |              |       |
| endocrine disorders                                                 | carcinoid syndrome                        |     |                               |            |              |   |     |                               |            |              |       |
| ear and labyrinth disorders                                         | neonatal hypoacusis                       | 4   | 25.99(9.55 25.98(9.56 92.16   | 4.64(3.35) | 24.96(10.80) | 0 |     |                               |            |              |       |
| cardiac disorders                                                   | cardiac ventricular disorder              |     |                               |            |              |   |     |                               |            |              |       |
| blood and lymphatic system disorders                                | hypersplenism                             |     |                               |            |              |   |     |                               |            |              |       |
| psychiatric disorders                                               | perseveration                             | 4   | 32.14(11.7 32.14(11.8 114.64  | 4.93(3.63) | 30.58(13.10) | 0 | 3   | 21.49(6.76 21.49(6.76 56.16   | 4.37(2.91) | 20.63(7.84 0 | 0.002 |
| psychiatric disorders                                               | suspected suicide                         | 36  | 14.29(10.2 14.28(10.2 434.57  | 3.81(3.33) | 13.98(10.60) | 0 | 22  | 10.47(6.86 10.46(6.8, 184.42  | 3.36(2.76) | 10.27(7.21 0 | 0     |

|                                                      |                                                   |     |                                |                             |       |     |                                |                             |       |  |  |
|------------------------------------------------------|---------------------------------------------------|-----|--------------------------------|-----------------------------|-------|-----|--------------------------------|-----------------------------|-------|--|--|
| psychiatric disorders                                | delirium tremens                                  | 3   | 17.28(5.49 17.28(5.44 44.75    | 4.07(2.63) 16.83(6.44 0.001 | 0.003 |     |                                |                             |       |  |  |
| psychiatric disorders                                | posturing                                         | 5   | 12.72(5.25 12.72(5.27 52.9     | 3.64(2.47) 12.48(5.95 0     | 0     |     |                                |                             |       |  |  |
| psychiatric disorders                                | helplessness                                      | 4   | 9.36(3.49, 9.36(3.51, 29.41    | 3.21(1.93) 9.23(4.04) 0.001 | 0.004 |     |                                |                             |       |  |  |
| psychiatric disorders                                | trance                                            |     |                                |                             |       | 8   | 34.69(16.9 34.68(16.7 244.51   | 5.02(4.04) 32.47(17.8 0     | 0     |  |  |
| psychiatric disorders                                | autophobia                                        |     |                                |                             |       | 3   | 23.53(7.39 23.53(7.4, 61.78    | 4.49(3.04) 22.51(8.54 0     | 0.001 |  |  |
| psychiatric disorders                                | suicide threat                                    |     |                                |                             |       | 4   | 12.84(4.76 12.84(4.73 42.55    | 3.65(2.36) 12.54(5.46 0     | 0.001 |  |  |
| psychiatric disorders                                | delusional perception                             |     |                                |                             |       | 4   | 12.75(4.73 12.75(4.69 42.24    | 3.64(2.35) 12.46(5.43 0     | 0.001 |  |  |
| psychiatric disorders                                | flashback                                         |     |                                |                             |       | 4   | 10.04(3.73 10.03(3.69 31.89    | 3.3(2.02) 9.85(4.3) 0.001   | 0.003 |  |  |
| psychiatric disorders                                | antisocial behaviour                              |     |                                |                             |       | 7   | 7.88(3.73, 7.88(3.74, 41.39    | 2.96(1.95) 7.77(4.16) 0     | 0     |  |  |
| investigations                                       | blood ph decreased                                | 17  | 13.45(8.32 13.45(8.24 191.63   | 3.72(3.05) 13.18(8.81 0     | 0     | 18  | 11.82(7.4, 11.81(7.38 174.01   | 3.53(2.87) 11.56(7.82 0     | 0     |  |  |
| investigations                                       | drug screen positive                              | 55  | 11.61(8.89 11.6(8.82, 522.88   | 3.51(3.13) 11.4(9.12) 0     | 0     | 72  | 10.79(8.55 10.78(8.52 625.02   | 3.4(3.07) 10.57(8.69 0      | 0     |  |  |
| investigations                                       | blood ph increased                                | 5   | 11.79(4.87 11.79(4.88 48.43    | 3.53(2.37) 11.58(5.52 0     | 0     | 4   | 7.75(2.89, 7.75(2.91, 23.16    | 2.94(1.66) 7.65(3.35) 0.002 | 0.006 |  |  |
| investigations                                       | grip strength                                     | 4   | 18.5(6.84, 18.5(6.81, 64.28    | 4.17(2.88) 17.99(7.83 0     | 0     |     |                                |                             |       |  |  |
| investigations                                       | po2 decreased                                     | 12  | 14.26(8.04 14.26(8.08 144.53   | 3.8(3.01) 13.95(8.64 0      | 0     |     |                                |                             |       |  |  |
| investigations                                       | anti-cyclic citrullinated peptide antibody        | 8   | 11.69(5.81 11.69(5.77 76.71    | 3.52(2.57) 11.49(6.4) 0     | 0     |     |                                |                             |       |  |  |
| investigations                                       | neurological examination abnormal                 | 4   | 10.76(4, 21 10.76(4.04 34.8    | 3.4(2.13) 10.59(4.63 0.001  | 0.002 |     |                                |                             |       |  |  |
| investigations                                       | drug level                                        |     |                                |                             |       | 4   | 76.04(26.5 76.03(26.3 256.68   | 6.04(4.68) 66.02(27.3 0     | 0     |  |  |
| investigations                                       | analgesic drug level above therapeutic            |     |                                |                             |       | 4   | 31.89(11.6 31.88(11.5 112.41   | 4.91(3.6) 30.01(12.8 0      | 0     |  |  |
| investigations                                       | blood ethanol increased                           |     |                                |                             |       | 4   | 17.04(6.29 17.04(6.27 58.39    | 4.04(2.75) 16.51(7.17 0     | 0     |  |  |
| investigations                                       | blood alcohol increased                           |     |                                |                             |       | 7   | 8.54(4.05, 8.54(4.06, 45.82    | 3.07(2.06) 8.41(4.5) 0      | 0     |  |  |
| investigations                                       | electrocardiogram st segment abnormal             |     |                                |                             |       | 5   | 8.49(3.51, 8.49(3.51, 32.49    | 3.06(1.9) 8.36(3.99) 0      | 0.001 |  |  |
| investigations                                       | blood chromogranin a increased                    |     |                                |                             |       | 3   | 8.24(2.63, 8.24(2.64, 18.76    | 3.02(1.59) 8.12(3.12) 0.006 | 0.016 |  |  |
| nervous system disorders                             | cerebrospinal fluid leakage                       | 16  | 11.77(7.18 11.77(7.21 154.71   | 3.53(2.84) 11.57(7.65 0     | 0     | 11  | 9.81(5.4, 19.81(5.45, 85.36    | 3.27(2.44) 9.64(5.85) 0     | 0     |  |  |
| nervous system disorders                             | anterior spinal artery syndrome                   | 8   | 101.78(48, 101.77(48, 684.19   | 6.45(5.43) 87.37(46.7 0     | 0     |     |                                |                             |       |  |  |
| nervous system disorders                             | piriformis syndrome                               | 3   | 17.79(5.64 17.78(5.59 46.18    | 4.11(2.67) 17.31(6.62 0.001 | 0.003 |     |                                |                             |       |  |  |
| nervous system disorders                             | arachnoid cyst                                    | 3   | 11.45(3.65 11.45(3.67 28.08    | 3.49(2.06) 11.26(4.33 0.003 | 0.008 |     |                                |                             |       |  |  |
| nervous system disorders                             | consciousness fluctuating                         | 8   | 10.76(5.35 10.76(5.31 69.59    | 3.4(2.45) 10.59(5.9) 0      | 0     |     |                                |                             |       |  |  |
| nervous system disorders                             | myoclonus                                         | 85  | 10.3(8.31, 10.29(8.29 700.86   | 3.34(3.03) 10.13(8.47 0     | 0     |     |                                |                             |       |  |  |
| nervous system disorders                             | phantom limb syndrome                             |     |                                |                             |       | 3   | 19.77(6.23 19.77(6.22 51.4     | 4.25(2.8) 19.05(7.25 0.001  | 0.002 |  |  |
| nervous system disorders                             | brain hypoxia                                     |     |                                |                             |       | 11  | 13.87(7.62 13.87(7.55 127.75   | 3.76(2.93) 13.52(8.19 0     | 0     |  |  |
| nervous system disorders                             | amnesic disorder                                  |     |                                |                             |       | 4   | 9.88(3.67, 9.88(3.71, 31.31    | 3.28(2) 9.71(4.24) 0.001    | 0.003 |  |  |
| nervous system disorders                             | hypoxic-ischaemic encephalopathy                  |     |                                |                             |       | 20  | 8.8(5.65, 18.79(5.6, 1135.73   | 3.11(2.49) 8.66(5.98) 0     | 0     |  |  |
| nervous system disorders                             | stupor                                            |     |                                |                             |       | 20  | 7.79(5.01, 7.79(4.96, 116.51   | 2.94(2.32) 7.68(5.31) 0     | 0     |  |  |
| general disorders and administration site conditions | catheter site granuloma                           | 4   | 174.47(57. 174.46(57. 536.55   | 7.09(5.67) 135.91(53. 0     | 0     | 3   | 92.67(27, 92.66(26.9 229.06    | 6.29(4.74) 78.19(27.8 0     | 0     |  |  |
| general disorders and administration site conditions | injection site granuloma                          | 9   | 53.36(27, 53.35(26.8 425.2     | 5.62(4.69) 49.15(27.7 0     | 0     | 14  | 133.1(73.7 133.05(73. 1445.6   | 6.71(5.91) 105.04(64. 0     | 0     |  |  |
| general disorders and administration site conditions | implant site extravasation                        | 9   | 16.12(8.31 16.12(8.28 124.32   | 3.98(3.07) 15.73(9.04 0     | 0     |     |                                |                             |       |  |  |
| general disorders and administration site conditions | implant site discharge                            | 5   | 13.75(5.67 13.75(5.69 57.82    | 3.75(2.58) 13.47(6.42 0     | 0     |     |                                |                             |       |  |  |
| general disorders and administration site conditions | haemorrhagic cyst                                 | 5   | 12.78(5.27 12.77(5.29 53.15    | 3.65(2.48) 12.53(5.97 0     | 0     |     |                                |                             |       |  |  |
| general disorders and administration site conditions | infusion site granuloma                           |     |                                |                             |       | 4   | 219.66(67. 219.64(67. 602.7    | 7.25(5.78) 152.36(56. 0     | 0     |  |  |
| general disorders and administration site conditions | medical device site erythema                      |     |                                |                             |       | 3   | 28.51(8.9, 28.51(8.97 75.29    | 4.76(3.29) 27.01(10.2 0     | 0.001 |  |  |
| general disorders and administration site conditions | brain death                                       |     |                                |                             |       | 20  | 8.62(5.54, 8.62(5.49, 132.36   | 3.09(2.46) 8.49(5.86) 0     | 0     |  |  |
| respiratory, thoracic and mediastinal disorders      | acute chest syndrome                              | 31  | 53.2(36.85 53.17(36.6 1459.77  | 5.61(5.09) 48.99(36.00      | 0     | 30  | 42.76(29.4 42.72(29.4 1125.19  | 5.3(4.77) 39.4(28.84 0      | 0     |  |  |
| respiratory, thoracic and mediastinal disorders      | bradypnoea                                        | 26  | 15.01(10.1 15.01(10.1 331.73   | 3.87(3.32) 14.67(10.5 0     | 0     | 26  | 12.32(8.34 12.31(8.32 263.55   | 3.59(3.04) 12.03(8.69 0     | 0     |  |  |
| respiratory, thoracic and mediastinal disorders      | respiratory arrest                                | 196 | 9.69(8.41, 9.66(8.42, 1498.14  | 3.25(3.05) 9.52(8.46) 0     | 0     | 181 | 8.04(6.94, 8(6.97, 9.1 1092.38 | 2.98(2.77) 7.89(6.98) 0     | 0     |  |  |
| respiratory, thoracic and mediastinal disorders      | paranasal cyst                                    | 6   | 30.03(13.2 30.03(13.1 160.49   | 4.84(3.74) 28.67(14.4 0     | 0     |     |                                |                             |       |  |  |
| respiratory, thoracic and mediastinal disorders      | obliterative bronchiolitis                        | 12  | 14.04(7.92 14.04(7.95 142.03   | 3.78(2.99) 13.74(8.51 0     | 0     |     |                                |                             |       |  |  |
| respiratory, thoracic and mediastinal disorders      | respiratory paralysis                             |     |                                |                             |       | 4   | 30.41(11.0 30.41(10.9 107.18   | 4.84(3.53) 28.71(12.3 0     | 0     |  |  |
| respiratory, thoracic and mediastinal disorders      | pneumonitis aspiration                            |     |                                |                             |       | 3   | 13.24(4.21 13.24(4.17 33.05    | 3.69(2.25) 12.92(4.95 0.002 | 0.005 |  |  |
| respiratory, thoracic and mediastinal disorders      | hypoventilation                                   |     |                                |                             |       | 24  | 9.81(6.55, 9.8(6.49, 1186.02   | 3.27(2.7) 9.63(6.87) 0      | 0     |  |  |
| respiratory, thoracic and mediastinal disorders      | respiratory acidosis                              |     |                                |                             |       | 26  | 8.63(5.86, 8.63(5.83, 172.38   | 3.09(2.54) 8.5(6.14) 0      | 0     |  |  |
| respiratory, thoracic and mediastinal disorders      | irregular breathing                               |     |                                |                             |       | 3   | 8.19(2.62, 8.19(2.63, 18.63    | 3.01(1.58) 8.07(3.11) 0.006 | 0.016 |  |  |
| respiratory, thoracic and mediastinal disorders      | asphyxia                                          |     |                                |                             |       | 52  | 8.08(6.14, 8.07(6.13, 316.88   | 2.99(2.6) 7.95(6.32) 0      | 0     |  |  |
| injury, poisoning and procedural                     | sedation complication                             | 39  | 21.57(15.6 21.55(15.7 738.26   | 4.38(3.93) 20.85(15.9 0     | 0     | 20  | 14.59(9.35 14.58(9.29 245.69   | 3.83(3.2) 14.19(9.78 0      | 0     |  |  |
| injury, poisoning and procedural                     | accidental overdose                               | 219 | 9.04(7.91, 9(7.85, 10. 1535.99 | 3.15(2.96) 8.89(7.95) 0     | 0     | 251 | 9.9(8.74, 19.84(8.75, 1955.95  | 3.27(3.09) 9.67(8.71) 0     | 0     |  |  |
| injury, poisoning and procedural                     | obstetric procedure complication                  | 6   | 146.56(60. 146.54(60. 699.44   | 6.89(5.71) 118.37(56. 0     | 0     |     |                                |                             |       |  |  |
| injury, poisoning and procedural                     | thermal burns of eye                              | 3   | 20.82(6.59 20.82(6.55 54.73    | 4.33(2.89) 20.16(7.7) 0     | 0.002 |     |                                |                             |       |  |  |
| injury, poisoning and procedural                     | environmental exposure                            | 3   | 19.49(6.17 19.49(6.13 50.99    | 4.24(2.8) 18.92(7.23 0.001  | 0.002 |     |                                |                             |       |  |  |
| injury, poisoning and procedural                     | exposure to contaminated device                   | 4   | 16.62(6.15 16.62(6.12 57.15    | 4.02(2.73) 16.2(7.06) 0     | 0.001 |     |                                |                             |       |  |  |
| injury, poisoning and procedural                     | procedural hypotension                            | 10  | 14.3(7.64, 14.3(7.64, 120.87   | 3.81(2.94) 14(8.28) 0       | 0     |     |                                |                             |       |  |  |
| injury, poisoning and procedural                     | documented hypersensitivity to administered produ | 9   | 13.84(7.15 13.84(7.11 104.86   | 3.76(2.86) 13.56(7.8) 0     | 0     |     |                                |                             |       |  |  |
| injury, poisoning and procedural                     | maternal exposure during delivery                 | 13  | 12.83(7.41 12.82(7.41 138.81   | 3.65(2.89) 12.58(7.94 0     | 0     |     |                                |                             |       |  |  |
| injury, poisoning and procedural                     | carbon monoxide poisoning                         | 3   | 9.16(2.93, 9.16(2.94, 21.48    | 3.18(1.75) 9.04(3.48) 0.005 | 0.013 |     |                                |                             |       |  |  |
| injury, poisoning and procedural                     | drug monitoring procedure incorrectly performed   |     |                                |                             |       | 6   | 17.34(7.68 17.34(7.61 89.25    | 4.07(2.98) 16.79(8.49 0     | 0     |  |  |

|                                                                     |                                           |      |                                 |                             |       |      |                                |                              |                         |   |
|---------------------------------------------------------------------|-------------------------------------------|------|---------------------------------|-----------------------------|-------|------|--------------------------------|------------------------------|-------------------------|---|
| injury, poisoning and procedural                                    | poisoning                                 |      |                                 |                             |       |      | 109                            | 10.95(9.06 10.92(8.98 961.47 | 3.42(3.15) 10.71(9.13 0 | 0 |
| infections and infestations                                         | meningitis herpes                         | 4    | 23.95(8.82 23.95(8.81 84.63     | 4.53(3.23) 23.08(10) 0      | 0     |      |                                |                              |                         |   |
| infections and infestations                                         | lupus vulgaris                            | 13   | 14.68(8.47 14.67(8.47 161.75    | 3.84(3.08) 14.35(9.06 0     | 0     |      |                                |                              |                         |   |
| infections and infestations                                         | retinitis                                 | 15   | 13.16(7.89 13.16(7.91 164.98    | 3.69(2.97) 12.9(8.41) 0     | 0     |      |                                |                              |                         |   |
| infections and infestations                                         | herpes zoster oticus                      | 4    | 10.39(3.87 10.39(3.9, 33.39     | 3.36(2.08) 10.24(4.48 0.001 | 0.003 |      |                                |                              |                         |   |
| infections and infestations                                         | lymph gland infection                     | 4    | 9.32(3.47, 9.32(3.5, 229.27     | 3.2(1.92) 9.2(4.03) 0.001   | 0.004 |      |                                |                              |                         |   |
| infections and infestations                                         | pseudomonas bronchitis                    |      |                                 |                             |       | 3    | 59.31(17.9 59.3(17.94 153.53   | 5.73(4.22) 53.06(19.4 0      | 0                       |   |
| infections and infestations                                         | herpes simplex meningoencephalitis        |      |                                 |                             |       | 3    | 47.83(14.6 47.82(14.7 125.4    | 5.45(3.96) 43.69(16.2 0      | 0                       |   |
| infections and infestations                                         | whipple's disease                         |      |                                 |                             |       | 4    | 10.4(3.86, 10.4(3.83, 33.3     | 3.35(2.07) 10.21(4.46 0.001  | 0.002                   |   |
| infections and infestations                                         | herpes simplex encephalitis               |      |                                 |                             |       | 3    | 9.32(2.98, 9.32(2.99, 21.88    | 3.2(1.77) 9.17(3.53) 0.005   | 0.012                   |   |
| infections and infestations                                         | lower respiratory tract infection fungal  |      |                                 |                             |       | 3    | 8.93(2.85, 8.93(2.87, 20.75    | 3.14(1.71) 8.79(3.38) 0.005  | 0.013                   |   |
| surgical and medical procedures                                     | detoxification                            | 5    | 20.77(8.52 20.77(8.6, 90.99     | 4.33(3.15) 20.12(9.54 0     | 0     | 3    | 9.75(3.11, 9.75(3.13, 23.11    | 3.26(1.83) 9.58(3.68) 0.004  | 0.011                   |   |
| surgical and medical procedures                                     | euthanasia                                | 3    | 15.52(4.94 15.52(4.98 39.75     | 3.92(2.49) 15.16(5.81 0.001 | 0.004 |      |                                |                              |                         |   |
| surgical and medical procedures                                     | patient restraint                         |      |                                 |                             |       | 3    | 32.23(10.0 32.23(9.94 85.22    | 4.92(3.45) 30.32(11.4 0      | 0.001                   |   |
| surgical and medical procedures                                     | drug rehabilitation                       |      |                                 |                             |       | 4    | 26.36(9.64 26.36(9.7, 92.64    | 4.65(3.34) 25.07(10.8 0      | 0                       |   |
| surgical and medical procedures                                     | self-medication                           |      |                                 |                             |       | 37   | 10.54(7.61 10.53(7.55 312.59   | 3.37(2.91) 10.33(7.87 0      | 0                       |   |
| surgical and medical procedures                                     | finger amputation                         |      |                                 |                             |       | 6    | 10.05(4.48 10.05(4.5, 47.93    | 3.3(2.22) 9.87(5.02) 0       | 0                       |   |
| gastrointestinal disorders                                          | oesophageal motility disorder             | 5    | 17.35(7.13 17.35(7.18 74.89     | 4.08(2.91) 16.9(8.03) 0     | 0     |      |                                |                              |                         |   |
| gastrointestinal disorders                                          | trichoglossia                             | 4    | 13.96(5.18 13.96(5.14 47.04     | 3.77(2.49) 13.67(5.96 0     | 0.001 |      |                                |                              |                         |   |
| gastrointestinal disorders                                          | oral discharge                            | 3    | 9.07(2.9, 29.07(2.91, 21.22     | 3.16(1.73) 8.95(3.45) 0.005 | 0.014 |      |                                |                              |                         |   |
| eye disorders                                                       | pupillary reflex impaired                 | 18   | 13.14(8.23 13.13(8.2, 197.49    | 3.69(3.03) 12.88(8.71 0     | 0     | 20   | 14.37(9.21 14.37(9.16 241.69   | 3.81(3.18) 13.99(9.64 0      | 0                       |   |
| eye disorders                                                       | pupil fixed                               | 17   | 12.36(7.65 12.36(7.72 173.94    | 3.6(2.93) 12.13(8.12 0      | 0     | 15   | 11.08(6.64 11.08(6.66 134.55   | 3.44(2.73) 10.86(7.08 0      | 0                       |   |
| eye disorders                                                       | lid sulcus deepened                       |      |                                 |                             |       | 3    | 15.13(4.8, 15.13(4.76 38.41    | 3.88(2.44) 14.71(5.62 0.001  | 0.004                   |   |
| congenital, familial and genetic disorders                          | foetal megacystis                         | 3    | 228.99(60. 228.98(60. 495.23    | 7.38(5.75) 166.8(54.9 0     | 0     |      |                                |                              |                         |   |
| congenital, familial and genetic disorders                          | vascular malformation                     | 6    | 39.4(17.26 39.39(17.2 210.91    | 5.21(4.11) 37.07(18.5 0     | 0     |      |                                |                              |                         |   |
| congenital, familial and genetic disorders                          | congenital pulmonary hypertension         | 3    | 21.81(6.89 21.81(6.86 57.51     | 4.4(2.95) 21.09(8.05 0      | 0.002 |      |                                |                              |                         |   |
| congenital, familial and genetic disorders                          | ductus arteriosus premature closure       | 3    | 13.47(4.29 13.47(4.32 33.88     | 3.72(2.29) 13.2(5.07) 0.002 | 0.005 |      |                                |                              |                         |   |
| congenital, familial and genetic disorders                          | newborn persistent pulmonary hypertension |      |                                 |                             |       | 4    | 23.54(8.63 23.53(8.66 82.38    | 4.49(3.19) 22.51(9.72 0      | 0                       |   |
| skin and subcutaneous tissue disorders                              | pruritus allergic                         | 13   | 10.88(6.28 10.87(6.28 114.52    | 3.42(2.66) 10.7(6.76) 0     | 0     |      |                                |                              |                         |   |
| skin and subcutaneous tissue disorders                              | chronic spontaneous urticaria             | 10   | 10.85(5.8, 10.85(5.79 87.82     | 3.42(2.56) 10.67(6.33 0     | 0     |      |                                |                              |                         |   |
| reproductive system and breast disorders                            | female reproductive tract disorder        | 4    | 16.39(6.07 16.39(6.03 56.3      | 4(2.71) 15.99(6.97 0        | 0.001 |      |                                |                              |                         |   |
| reproductive system and breast disorders                            | perineal pain                             |      |                                 |                             |       | 4    | 7.78(2.9, 27.78(2.92, 23.28    | 2.94(1.66) 7.68(3.36) 0.002  | 0.006                   |   |
| renal and urinary disorders                                         | urinary bladder rupture                   | 4    | 20.19(7.46 20.19(7.43 70.61     | 4.29(3) 19.57(8.5) 0        | 0     |      |                                |                              |                         |   |
| renal and urinary disorders                                         | nephrosclerosis                           | 10   | 12.19(6.52 12.19(6.51 100.69    | 3.58(2.72) 11.97(7.09 0     | 0     |      |                                |                              |                         |   |
| renal and urinary disorders                                         | bladder neck obstruction                  |      |                                 |                             |       | 4    | 22.72(8.34 22.72(8.36 79.41    | 4.44(3.15) 21.77(9.41 0      | 0                       |   |
| neoplasms benign, malignant and unspecified (incl cysts and polyps) | systemic mastocytosis                     | 4    | 19.23(7.11 19.23(7.08 67.02     | 4.22(2.93) 18.67(8.12 0     | 0     | 3    | 16.66(5.27 16.66(5.24 42.71    | 4.01(2.57) 16.15(6.17 0.001  | 0.003                   |   |
| neoplasms benign, malignant and unspecified (incl cysts and polyps) | neuroendocrine tumour of the lung         | 3    | 39.82(12.3 39.82(12.2 106.59    | 5.23(3.76) 37.45(14.0 0     | 0     |      |                                |                              |                         |   |
| neoplasms benign, malignant and unspecified (incl cysts and polyps) | metastases to eye                         | 6    | 33.93(14.9 33.92(14.8 181.62    | 5.01(3.91) 32.19(16.1 0     | 0     |      |                                |                              |                         |   |
| cardiac disorders                                                   | rhythm idioventricular                    | 4    | 17.83(6.6, 17.83(6.56 61.73     | 4.12(2.83) 17.35(7.55 0     | 0     |      |                                |                              |                         |   |
| cardiac disorders                                                   | cardiovascular symptom                    | 3    | 10.41(3.32 10.41(3.34 25.08     | 3.36(1.93) 10.25(3.94 0.003 | 0.01  |      |                                |                              |                         |   |
| cardiac disorders                                                   | myocardial fibrosis                       |      |                                 |                             |       | 7    | 8.92(4.22, 8.92(4.24, 48.32    | 3.13(2.12) 8.78(4.69) 0      | 0                       |   |
| vascular disorders                                                  | neonatal hypotension                      |      |                                 |                             |       | 5    | 18.86(7.72 18.86(7.66 81.47    | 4.19(3.01) 18.21(8.62 0      | 0                       |   |
| vascular disorders                                                  | visceral congestion                       |      |                                 |                             |       | 8    | 15.33(7.58 15.32(7.57 103.89   | 3.9(2.94) 14.89(8.27 0       | 0                       |   |
| immune system disorders                                             | drug hypersensitivity                     | 5372 | 31.77(30.8 28.41(27.8 136291.89 | 4.77(4.72) 27.19(26.5 0     | 0     | 1430 | 20.08(19.0 19.33(18.2 23975.33 | 4.22(4.14) 18.64(17.8 0      | 0                       |   |
| immune system disorders                                             | contrast media allergy                    | 24   | 16.91(11.2 16.9(11.2, 349.42    | 4.04(3.47) 16.47(11.7 0     | 0     |      |                                |                              |                         |   |
| endocrine disorders                                                 | hypogonadism male                         |      |                                 |                             |       | 19   | 46.74(29.2 46.71(29.1 776.57   | 5.42(4.76) 42.77(28.8 0      | 0                       |   |
| endocrine disorders                                                 | carcinoid crisis                          |      |                                 |                             |       | 4    | 23.82(8.73 23.82(8.77 83.41    | 4.51(3.21) 22.77(9.83 0      | 0                       |   |
| musculoskeletal and connective tissue                               | seronegative arthritis                    | 8    | 9.89(4.92, 9.89(4.88, 62.9      | 3.28(2.33) 9.75(5.43) 0     | 0     |      |                                |                              |                         |   |
| hepatobiliary disorders                                             | sphincter of oddi dysfunction             | 15   | 35.93(21.3 35.92(21.1 480.9     | 5.09(4.36) 33.98(21.9 0     | 0     | 9    | 49.99(25.1 49.97(25.1 392.28   | 5.51(4.57) 45.48(25.6 0      | 0                       |   |
